1 **Purine nucleosides replace cAMP in allosteric regulation of PKA in**  
2 **trypanosomatid pathogens**

3  
4 Veronica Ober<sup>1#</sup>, George B. Githure<sup>1#</sup>, Yuri Volpato Santos<sup>1#</sup>, Sidney Becker<sup>3</sup>, Gabriel Moya<sup>1</sup>,  
5 Jérôme Basquin<sup>4</sup>, Frank Schwede<sup>2</sup>, Esben Lorentzen<sup>5</sup>, Michael Boshart<sup>1\*</sup>

6  
7  
8 <sup>1</sup> *Faculty of Biology, Genetics, Ludwig-Maximilians-University Munich (LMU), 82152*

9 *Martinsried, Germany*

10 <sup>2</sup> *BIOLOG Life Science Institute GmbH & Co. KG, 28199 Bremen, Germany*

11 <sup>3</sup> *Max Planck Institute of Molecular Physiology, Dortmund, 44227 Germany*

12 <sup>4</sup> *Max Planck Institute for Biochemistry, 82152 Martinsried, Germany*

13 <sup>5</sup> *Department of Molecular Biology and Genetics, Aarhus University, Aarhus, Denmark*

14  
15 # equal contributions of authors

16 \* corresponding author: Prof. Michael Boshart [boshart@lmu.de](mailto:boshart@lmu.de)

17

18 **Abstract**

19 Cyclic nucleotide binding domains (CNB) confer allosteric regulation by cAMP or cGMP to  
20 many signalling proteins, including PKA and PKG. PKA of phylogenetically distant  
21 *Trypanosoma* is the first exception as it is cyclic nucleotide independent and responsive to  
22 nucleoside analogues (Bachmaier et al. 2019). Here we show that natural nucleosides inosine,  
23 guanosine and adenosine are nanomolar affinity CNB ligands and activators of PKA orthologs  
24 of the important tropical pathogens *T. brucei*, *T. cruzi* and *Leishmania*. The sequence and  
25 structural determinants of binding affinity, -specificity and kinase activation of PKAR were  
26 established by structure-activity relationship (SAR) analysis, co-crystal structures and  
27 mutagenesis. Substitution of 2-3 amino acids in the binding sites is sufficient for conversion of  
28 CNB domains from nucleoside to cyclic nucleotide specificity. In addition, a trypanosomatid-  
29 specific C-terminal helix ( $\alpha$ D) is required for high affinity binding to CNB-B. The  $\alpha$ D helix  
30 functions as a lid of the binding site that shields ligands from solvent. Selectivity of guanosine  
31 for CNB-B and of adenosine for CNB-A results in synergistic kinase activation at low  
32 nanomolar concentration. PKA pulldown from rapid lysis establishes guanosine as the  
33 predominant ligand *in vivo* in *T. brucei* bloodstream forms, whereas guanosine and adenosine  
34 seem to synergize in the procyclic developmental stage in the insect vector. We discuss the  
35 versatile use of CNB domains in evolution and recruitment of PKA for novel nucleoside-  
36 mediated signalling.

37

38

## 39 **Introduction**

40 Protein kinase A (PKA) is a prototype kinase first purified from rabbit skeletal muscle in 1968  
41 (Walsh, Perkins, and Krebs 1968). More than 40 years of trailblazing biochemical and  
42 structural work elucidated the mechanism of allosteric activation by cAMP, providing a  
43 paradigm of allosteric regulation (Taylor et al. 2021). Inactive PKA is a dimeric or tetrameric  
44 complex of regulatory (R) and catalytic (C) subunits, depending on the species. Upon  
45 activation, two molecules of cAMP bind to two cyclic nucleotide binding domains (CNB)  
46 arranged in tandem in the C-terminal part of the regulatory subunit(s). Cyclic AMP binding to  
47 the C-terminal CNB-B initiates a conformation change that opens up the adjacent CNB-A for  
48 a second cAMP molecule whose binding completes the conformational transition that liberates  
49 the C-subunit from the holoenzyme complex (Kim et al. 2007). The free C subunit is thereby  
50 released from autoinhibition and activated (Kim et al. 2007; Taylor et al. 2012). PKA is a highly  
51 conserved kinase present in all eukaryotes except plants, functioning in diverse signalling  
52 processes ranging from metabolic regulation and hormone action to cell differentiation and  
53 synaptic long term potentiation underlying memory (Lee et al. 2021). In protists and fungi the  
54 predominant functions are response to carbon source changes and regulation of  
55 developmental transitions, infectivity or sexual dimorphism (Perrin et al. 2020; Hitz et al. 2021;  
56 Uboldi et al. 2018; Jia et al. 2017; Choi, Jung, and Kronstad 2015; Kim et al. 2021;  
57 Vaidyanathan et al. 2014). Regulation of PKA by cAMP was universally found (Rinaldi et al.  
58 2010; Haste et al. 2012; Kurokawa et al. 2011; Taylor et al. 2012), which is why PKA and  
59 cAMP-dependent protein kinase are used as synonyms. Furthermore, cAMP dependence was  
60 assumed and widely cited in reviews for PKAs of species for which uncontested biochemical  
61 evidence is lacking, including protozoan flagellates of the phylogenetically distant order  
62 *Kinetoplastida*. It was therefore of greatest interest that PKA in *Trypanosoma brucei*, a parasitic  
63 and pathogenic member of the *Kinetoplastida* was found unresponsive to cAMP even at high  
64 intracellular concentrations (Bachmaier et al. 2019; Bubis et al. 2018). Compound screening

65 then identified 7-deazapurine nucleoside antibiotics as nanomolar activators of TbPKA  
66 (Bachmaier et al. 2019).

67 *Trypanosoma brucei*, *Trypanosoma cruzi* and *Leishmania sp.* are related trypanosomatid  
68 pathogens causing the deadly neglected tropical diseases sleeping sickness, Chagas disease  
69 and leishmaniosis, respectively. In addition, *Trypanosoma* is responsible as animal pathogen  
70 for important economic losses and impedes social development in affected countries. These  
71 organisms are famous for discovery of many exotic biochemical and genetic mechanisms  
72 (Matthews 2015) and not surprisingly, signaling systems diverge from other model organisms  
73 and few pathways are on the way to be assembled (Matthews 2021). Nevertheless, cAMP  
74 seems to play an important role: *T. brucei* encodes > 80 adenylate cyclase genes (Salmon,  
75 Bachmaier, et al. 2012) that are important for host innate immunity subversion (Salmon,  
76 Vanwalleghem, et al. 2012) and for development of the parasite in its insect vector (Bachmaier  
77 et al. 2022). These pathways are obviously uncoupled from the cAMP unresponsive PKA and  
78 seem to use alternative and novel cAMP effectors (Bachmaier et al. 2023). PKA in these  
79 parasites is essential and important for cell division (Bachmaier et al. 2019; Baker et al. 2021;  
80 Cayla et al. 2022) and in *T. brucei* has been identified as candidate member of a quorum  
81 sensing pathway and implicated in stage development (Mony et al. 2014; Toh et al. 2021). The  
82 genome of *T. brucei* encodes one regulatory and three catalytic subunits that all have syntenic  
83 orthologs in *T. cruzi* and *Leishmania*. The upstream pathway(s) regulating PKA in these  
84 organisms have not been identified. However, the high degree of conservation of the CNBs in  
85 TbPKA and their high affinity binding to nucleoside analogues (Bachmaier et al. 2019)  
86 suggested the existence of an alternative second messenger. PKG, a related AGC kinase, is  
87 also subject to allosteric regulation by cyclic nucleotides, responding to cyclic guanosine  
88 monophosphate (cGMP) instead of cAMP (Huang, Kim, et al. 2014; Kim and Sharma 2021).  
89 The high structural similarity of the CNB domains in PKA and PKG spurred attempts to define  
90 determinants of cyclic nucleotide binding selectivity. Amino acids that contribute to selectivity  
91 have been identified (Lorenz et al. 2017; Shabb et al. 1991; Shabb, Ng, and Corbin 1990;



92 Huang, Gerlits, et al. 2014; Weber, Shabb, and Corbin 1989; Corbin et al. 1986; Kim and  
93 Sharma 2021; Lorenz, Bertinetti, and Herberg 2017), but establishing a consensus of key  
94 determinants has been challenging. Differences in ligand specificity of PKAR between a  
95 pathogen and its host is a unique opportunity for future drug development for a group of  
96 pathogens for which there is much medical need for improved treatment options. Hence,  
97 identification of physiological ligands of trypanosomatid PKA and definition of their binding  
98 selectivity were important goals.

99 Here we show that purine nucleosides exhibit nanomolar affinity for the PKA regulatory  
100 subunits of these pathogens and activate the kinases. We define the minimal changes that  
101 convert a nucleoside-specific CNB to cyclic nucleotide specificity. Furthermore, we see site-  
102 selective binding and synergy between guanosine and adenosine, compatible with binding *in*  
103 *vivo* to PKAR. Expansion of the ligand portfolio of CNBs in evolution has enabled repurposing  
104 of PKA for a different signalling pathway, while maintaining the sophisticated allosteric  
105 activation mechanism triggered by ligand binding to PKA.

106

## 107 **Results**

108

### 109 **Nucleosides are direct activators of PKA in trypanosomes**

110 We recently identified the nucleoside analogue 7-cyano-7-deaza-inosine (7-CN-7-C-Ino,  
111 Jaspamycin) and related compounds like Toyocamycin as potent activators of the cAMP-  
112 independent PKA of *Trypanosoma* (Bachmaier et al. 2019). Attempts to bioinformatically  
113 detect pathways for synthesis of these nucleoside antibiotics in trypanosomatids have been  
114 unsuccessful. Therefore, we considered unmodified purine nucleosides and studied the  
115 structure-activity-relationship (SAR) for kinase activation (Fig. 1a and Table 1). Tagged R- and  
116 C1-subunits of *T. brucei* PKA were co-expressed in *Leishmania tarentolae* and stoichiometric  
117 holoenzyme complexes were tandem-affinity purified (Supplementary Fig. 1a). The tandem-  
118 affinity purification to near homogeneity guaranteed removal of any heterologous complexes  
119 formed with endogenous PKA subunits of the expression system. EC<sub>50</sub> values for kinase  
120 activation were determined from dose response assays (Fig. 1b, Table 1, Supplementary Fig.  
121 1a). Surprisingly, inosine was the most potent activator (EC<sub>50</sub> 14 nM). We did not expect this  
122 result as the structure of TcPKAR bound to 7-CN-7-C-Ino (PDB: 6FTF) and computational  
123 docking of 7-deaza analogues had suggested an important role of the cyano group at position  
124 7 of the purine ring (Bachmaier et al. 2019). The SAR analysis (Fig. 1a, Table 1,  
125 Supplementary Fig. 1a) showed oxygen at position 6 in the purine ring to be particularly  
126 important, as nebularine, lacking a 6-substitution, was 186-fold less potent than inosine. An  
127 amino group substitution at position 6 (adenosine) resulted in a further 2-fold drop in potency.  
128 An amino group at position 2 (guanosine) caused 11-fold and a keto group in this position  
129 (xanthosine) a >4400-fold lower activation potency, respectively. A structural isomer of inosine  
130 (allopurinol riboside) with restricted delocalized  $\pi$ -electron system showed 120-fold reduced  
131 activation. The structure of TcPKAR bound to 7-CN-7-C-Ino (Bachmaier et al. 2019) predicted  
132 an important role of the ribose moiety that is accommodated deep in the binding pocket. The  
133 2'-, 3'- and 5'-deoxy derivatives of adenosine confirmed essential roles for all three hydroxyl

a

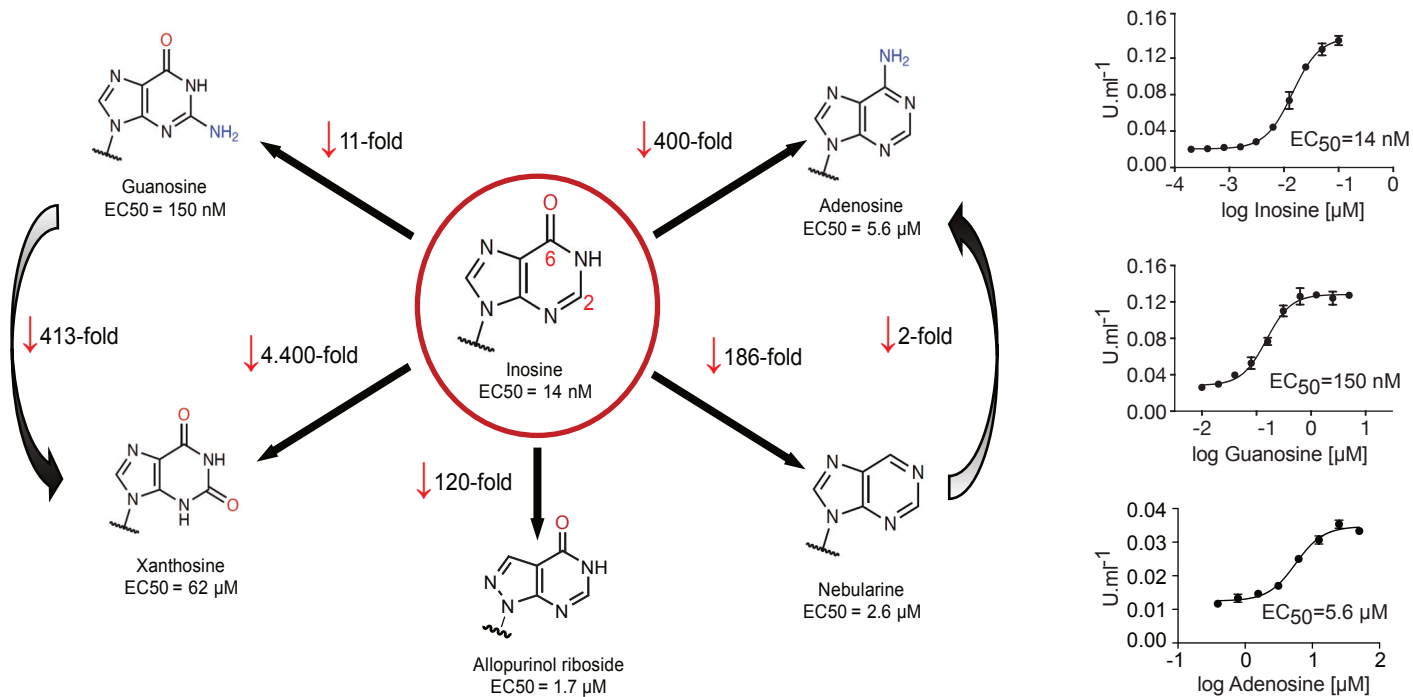

c

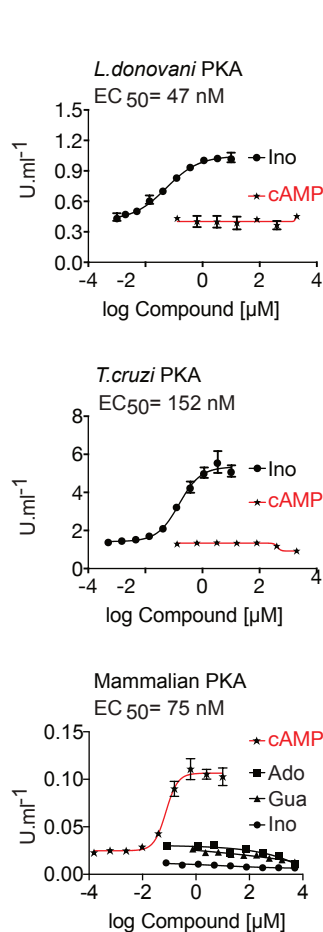

d *T. brucei* PKAR

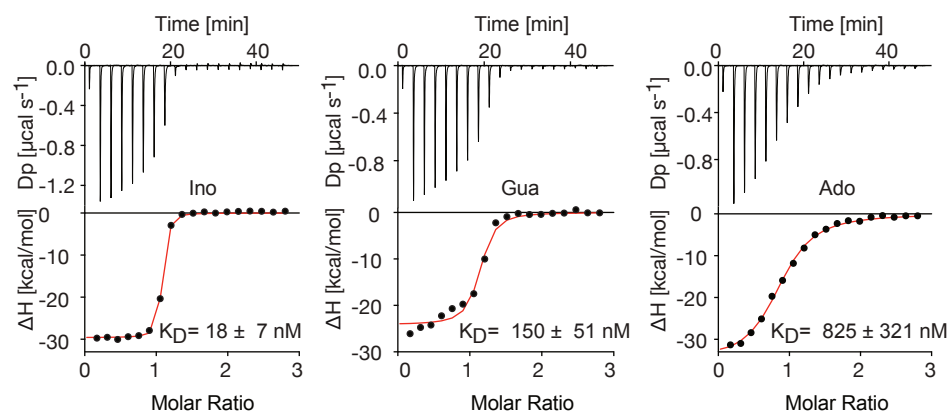

e *L. donovani* PKAR

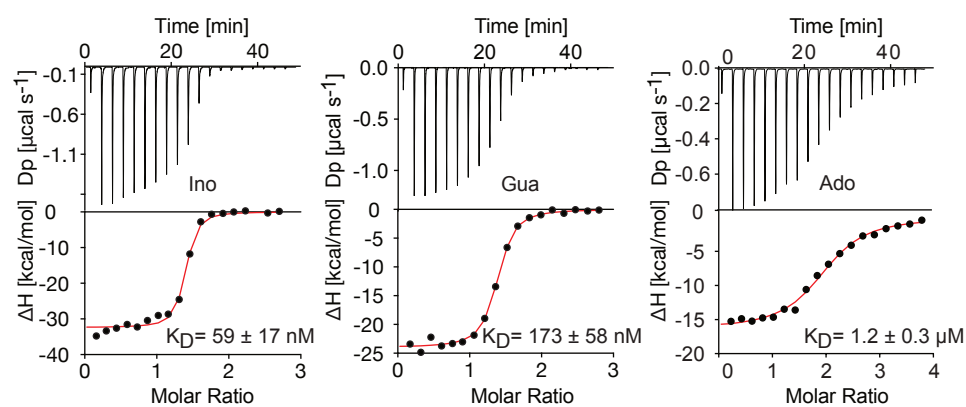

**Figure 1. Trypanosomatid PKA binds to and is selectively activated by purine nucleosides.**

**a** Structure-Activity Relationship (SAR) analysis for TbPKA kinase activation by nucleoside derivatives. Chemical structures and the corresponding  $EC_{50}$  values are taken from Table 1. For representative dose-response curves see Supplementary Fig. 1. **b** Representative dose response curves for activation of *T. brucei* PKAR-PKAC1 holoenzyme by inosine, guanosine or adenosine (*in vitro* kinase assay,  $n \geq 3$  biological replicates). The calculated  $EC_{50}$  values are displayed next to the graph and in Table 1, error bars indicate SD of technical triplicates. Purity of PKA enzymes is shown in Supplementary Fig. 1a. **c** Representative dose-response curves for activation of *L. donovani*, *T. cruzi* and mammalian (human R1 $\alpha$ /mouse C $\alpha$ ) holoenzymes by purine nucleosides and cAMP, as in A. The calculated  $EC_{50}$  values are displayed next to the curve and in Table 1, error bars indicate SD of technical triplicates; Purity of PKA holoenzyme is shown in Supplementary Fig. 1b. **d** Binding isotherms (ITC) of nucleoside-depleted (APO) *T. brucei* PKAR(199-499) upon titration with purine nucleosides. The graphs give the difference power (DP) between the reference and sample cells upon ligand injection as a function of time (upper panel). In the lower panel, the total heat exchange per mole of injectant (integrated peak areas from upper panel) is plotted against the molar ratio of ligand to protein. A representative curve out of  $\geq 3$  independent replicates is shown. The final given  $K_D$  (as in Table S2) was calculated as the mean ( $\pm$  SD) of at least 3 independent experiment (see Source Data File). For purity of R subunit eluted from SEC see Supplementary Fig. S3a. **e** Binding isotherms (ITC) of nucleoside-depleted (APO) *L. donovani* PKAR1(200-502) upon titration with purine nucleosides, as in D. Purity, aggregation state and thermal stability of protein sample prior to binding assays is shown in Supplementary Fig. 3c, d.

1189  
1190

**Table 1: Structure activity relation (SAR) analysis for PKA holoenzyme activation**

| PKA holoenzyme complex        | Ligand               | EC <sub>50</sub> (95% CI) <sup>1</sup> |
|-------------------------------|----------------------|----------------------------------------|
| <i>T. brucei</i> PKAR/PKAC1   | Inosine              | 14 (13 - 15) nM                        |
|                               | Guanosine            | 152 (132 - 172) nM                     |
|                               | Adenosine            | 7.0 (6.9 - 8.4) μM                     |
|                               | cAMP                 | - <sup>2</sup>                         |
|                               | cGMP                 | 0.36 (0.33 - 0.41) mM                  |
|                               | cIMP                 | - <sup>2</sup>                         |
|                               | AMP                  | - <sup>2</sup>                         |
|                               | GMP                  | 1.1 (0.9 - 1.3) mM                     |
|                               | IMP                  | 108 (83 - 135) μM                      |
|                               | 2'-deoxyadenosine    | - <sup>2</sup>                         |
|                               | 3'-deoxyadenosine    | - <sup>2</sup>                         |
|                               | 5'-deoxyadenosine    | - <sup>2</sup>                         |
|                               | Nebularine           | 2.6 (2.2 - 3.2) μM                     |
|                               | Allopurinol riboside | 1.7 (1.5 - 1.9) μM                     |
|                               | Xanthosine           | 62 (51 - 72) μM                        |
| Uridine                       | 40 (35 - 47) μM      |                                        |
| Cytidine                      | ≥350 μM              |                                        |
| <i>Leishmania</i> PKAR1/PKAC1 | Inosine              | 47 (33 - 63) nM                        |
|                               | Guanosine            | 1.7 (1.4 - 2.1) μM                     |
|                               | Adenosine            | 6.5 (5.7 - 7.6) μM                     |
|                               | cAMP                 | - <sup>2</sup>                         |
| <i>T. cruzi</i> PKAR/PKAC2    | Inosine              | 150 (110 - 200) nM                     |
|                               | Guanosine            | 3.5 (2.8 - 4.5) μM                     |
|                               | Adenosine            | 8.3 (5.2 - 12.4) μM                    |
|                               | cAMP                 | - <sup>2</sup>                         |
| human R1a/mouse Cα            | Inosine              | - <sup>2</sup>                         |
|                               | Guanosine            | - <sup>2</sup>                         |
|                               | Adenosine            | - <sup>2</sup>                         |
|                               | cAMP                 | 75 (59 - 93) nM                        |

1191

1192 <sup>1</sup> mean half activation constants (EC<sub>50</sub>) and 95% confidence interval (95% CI) determined from  
1193 Supplementary Fig. 1 using Graphpad prism 7.0 for technical triplicates.

1194 <sup>2</sup> no activation was detected up to a maximum concentration of 5mM

1195

134 groups of the ribose ring (Table 1, Supplementary Fig. 1a). Inosine and guanosine 5'-  
135 monophosphates were >7700-fold less potent than the respective nucleosides and AMP did  
136 not activate even at 5 mM. Cyclic GMP activated the kinase in the upper micromolar range,  
137 whereas cAMP and cIMP were inactive up to 5mM. Pyrimidine nucleosides uridine and cytidine  
138 were 3-4 orders of magnitude less potent than purine nucleosides (Table 1, Supplementary  
139 Fig. 1a). In summary, the natural nucleoside inosine is only 2-fold less potent as activator than  
140 the nucleoside analogue activator 7-CN-7-C-Ino (6.5 nM)(Bachmaier et al. 2019) but 5-fold  
141 more potent than cAMP to activate the recombinant mammalian PKAR1 $\alpha$ 2-2PKAC $\alpha$   
142 holoenzyme purified from *E. coli* (Fig. 1c, Table 1). Therefore, purine nucleosides qualify as  
143 possible physiological activators of TbPKA in trypanosomes.

144

#### 145 **Nucleoside activation of PKA in kinetoplastid pathogens**

146 Next, we asked if activation by nucleosides and complete insensitivity to cAMP is a unique  
147 feature of *T. brucei* PKA or a shared feature in the protozoan class of Kinetoplastida. We  
148 selected the medically important *Trypanosoma cruzi* and *Leishmania donovani* as  
149 representatives of this group. Orthologous regulatory subunits (TcPKAR and LdPKAR1) and  
150 catalytic subunits (TcPKAC2 and LdPKAC1), respectively, were tagged and co-expressed in  
151 *Leishmania tarentolae*, and holoenzyme complexes were tandem affinity purified  
152 (Supplementary Fig. 1b, c). The kinase assay dose responses (Fig. 1c, Supplementary Fig.  
153 1b, c) show that inosine is the most potent of the tested nucleosides for all analysed species,  
154 whereas no activation was observed with cAMP, even at very high concentrations (Fig. 1c,  
155 Table 1). Activation potency of inosine or guanosine was between 3-fold and 23-fold lower for  
156 *Leishmania* and *T. cruzi*, compared to *T. brucei*. The mammalian R1 $\alpha$ 2:Ca $^{2+}$  holoenzyme,  
157 included as control, was activated by cAMP with an EC $_{50}$  of 75 nM in agreement with Herberg,  
158 Taylor, and Dostmann (1996), but was completely insensitive to inosine. We conclude that the  
159 PKAs of *T. cruzi* and *L. donovani* are also cAMP-independent nucleoside activated kinases.  
160 The same order of potency was found among the 3 tested nucleosides, adenosine being the

161 weakest activator ( $EC_{50} \sim 6-8 \mu M$ ) of PKA in the three parasite species (Supplementary Fig.  
162 1b-c, Table 1)

163

#### 164 **Binding of nucleosides to kinetoplastid PKAs**

165 To further investigate purine nucleoside-specific allosteric regulation of kinetoplastid PKAs,  
166 nucleoside binding parameters were determined for the isolated R-subunits. The N-terminally  
167 truncated PKARs of the respective species containing the two tandem cyclic nucleotide binding  
168 domains (CNBs) were expressed in *E. coli* and purified. Initially, binding assays with natively  
169 purified PKAR were inconclusive and highly variable using several methods. We concluded  
170 that the purified PKAR was at least partially bound by ligands or metabolites derived from *E.*  
171 *coli*, similar to the mammalian PKAR subunit that tightly binds cAMP when purified from  
172 bacteria (Buechler, Herberg, and Taylor 1993). To confirm this directly, TbPKAR or HsPKAR1 $\alpha$   
173 purified from *E. coli* were boiled to denature the proteins and separated by centrifugation.  
174 Supernatants containing released ligands were collected and tested in kinase assays with  
175 purified holoenzyme as before (Supplementary Fig. 2). The supernatant of the boiled  
176 HsPKAR1 $\alpha$  fully activated the mammalian holoenzyme, but not the *T. brucei* holoenzyme, as  
177 would be expected for cAMP. In contrast, the supernatant from boiled TbPKAR fully activated  
178 the *T. brucei* holoenzyme but not the mammalian one (Supplementary Fig. 2b). In the  
179 HsPKAR1 $\alpha$ -derived supernatant only cAMP was detected by LC-MS (Supplementary Fig. 2d),  
180 whereas in the TbPKAR-derived supernatant nucleosides (predominantly inosine) were  
181 detected (Supplementary Fig. 2c). This experiment qualitatively showed tight binding of  
182 nucleosides to TbPKAR in *E. coli*. Subsequently, we routinely denatured the purified His-  
183 tagged regulatory subunits to remove any pre-bound ligands (see Methods). Refolding  
184 conditions were optimized by a buffer screen and monitored by differential scanning fluorimetry  
185 (nanoDSF) (Niesen, Berglund, and Vedadi 2007) and size exclusion chromatography  
186 (Supplementary Fig. 3a-d). The thermal stability of proteins was determined by nanoDSF that  
187 records changes of the ratio of intrinsic fluorescence at two wavelengths (330 and 350nm).

188 Natively purified TbPKAR(199-499) unfolded at  $T_m$  of 59,5°C. When refolded in absence of  
189 ligand (APO form) the  $T_m$  was only 42,3°C (Supplementary Fig. 3b). This is interpreted as  
190 stabilization of the purified TbPKAR by its partial loading with nucleosides from *E. coli*. Indeed,  
191 upon saturating the ligand-bound state of the refolded and the natively purified protein  
192 preparations by addition of excess inosine, the  $T_m$  raised to 68°C for both. The identical  $T_m$   
193 strongly indicates correct folding after renaturation. Ligand-depleted LdPKAR1(200-502) was  
194 prepared in the same way (Supplementary Fig. 3c-d), whereas for TcPKAR the yield of  
195 refolded protein ( $\leq 2\mu\text{M}$ ) was too low to carry out further experiments. Isothermal titration  
196 calorimetry (ITC) measurements showed high affinity binding of inosine and guanosine to both  
197 TbPKAR (Fig. 1d) and LdPKAR1 (Fig.1e) with nanomolar  $K_D$  values (Supplementary Table 2),  
198 matching closely the  $EC_{50}$  values for kinase activation (Table 1). Adenosine, the weakest  
199 activator of both kinases, is also the weakest binder. Inosine did not bind at all to human  
200 PKAR1 $\alpha$ , which bound cAMP with a  $K_D$  of 23 nM (Supplementary Fig. 1d). LdPKAR1 did not  
201 bind to cAMP (Supplementary Fig. 1d) as shown before for TbPKAR (Bachmaier et al. 2019).  
202 The binding data thus support nucleoside-specificity and cAMP independence of the  
203 trypanosomatid PKAs. The stoichiometry of purine nucleosides binding to TbPKAR as  
204 calculated from ITC data was  $N \approx 1$ , apparently lower than expected for the two binding sites  
205 occupied by inosine in the co-crystal structures (see below). We cannot exclude the possibility  
206 that a fraction of the refolded protein unfolds or aggregates after purification or is bound to  
207 remaining traces of the ligand and therefore not available for binding at the time of ITC analysis  
208 (see Methods). The thermodynamic signature of nucleosides binding to kinetoplastid PKA  
209 resembles that of mammalian PKA bound by cAMP (Supplementary Fig. 5). The enthalpic  
210 contribution to binding ( $\Delta H$ ), indicating strong hydrogen bonding, is counteracted by a relatively  
211 large loss of entropy ( $T\Delta S$ ), indicating bound-state conformational constrains.

212

213 **Structure of the nucleoside-binding pockets**



214 To evaluate the binding mode, we solved the crystal structures of *T. cruzi* PKAR(200-503) and  
215 *T. brucei* PKAR(199-499) bound to inosine at 1.4 Å and 2.1 Å resolution, respectively  
216 (Supplementary Fig. 3f and g, Supplementary Table 1). Attempts to crystallize LdPKAR1(200-  
217 502) were unsuccessful. The structures of TbPKAR and TcPKAR show high overall similarity.  
218 Calculated RMSD of C $\alpha$  alignment was 0.796 Å for the entire proteins and 0.281/0.342 Å for  
219 CNB-A and CNB-B, respectively. Residues that contribute to high affinity binding by interacting  
220 with the ribose moiety of inosine are identical in both structures (Fig. 2 a, b; Supplementary  
221 Fig. 3o; Supplementary Movie 1) and reside in a segment that we denoted ribose binding  
222 cassette (RBC), in analogy to the phosphate binding cassette (PBC) nomenclature for  
223 mammalian PKA (Canaves and Taylor 2002). These residues in site A (308-320<sup>TbPKAR</sup>, 309-  
224 321<sup>TcPKAR</sup>) and site B (432-445<sup>TbPKAR</sup>, 433-446<sup>TcPKAR</sup>) engage in the same interactions with  
225 inosine as in our previously described co-crystal structure of TcPKAR(200-503) with 7-CN-7-  
226 C-Ino (PDB: 6FTF) (Bachmaier et al. 2019). Likewise, the “capping” by  $\pi$ -stacking with the  
227 purine ring in both sites (Y371/483<sup>TcPKAR</sup>, Y370/482<sup>TbPKAR</sup>) and the interacting residues in the  
228 lid-like  $\alpha$ D helix are conserved. Thus, the binding mode of inosine and 7-CN-7C-Ino is almost  
229 identical. Minor differences are compatible with similar affinities of inosine and 7-CN-7-C-Ino.  
230 In site A amino acid K294 donates a hydrogen bond to the cyano group of 7-CN-7-C-Ino (Fig.  
231 2c). When bound to inosine, however, a different side chain rotamer of K294 is preferred, and  
232 a hydrogen bond can now be formed with the keto group in position 6 of the purine ring (Fig.  
233 2c). In site B the bulkiness of the cyano group displaces the side chain of Y485 by 1.5 Å,  
234 creating a small hydrophobic pocket able to fit C7-derivatives (Bachmaier et al. 2019) (Fig. 2c).  
235 Comparison of mammalian cAMP-bound PKAR1 $\alpha$  (PDB:1RGS) with nucleoside-bound  
236 kinetoplastid structures (PDB: 6FLO) clearly suggests that residues A202/R209<sup>PKAR1 $\alpha$</sup>  in site  
237 A and A326/R333<sup>PKAR1 $\alpha$</sup>  in site B are key to explain the altered ligand specificity of the  
238 kinetoplastid PKAR subunits (Fig. 2d). The arginine residues 209/333<sup>PKAR1 $\alpha$</sup>  conserved in most  
239 PKARs are replaced by polar amino acids, and the alanine residues 202/326<sup>PKAR1 $\alpha$</sup>  are replaced



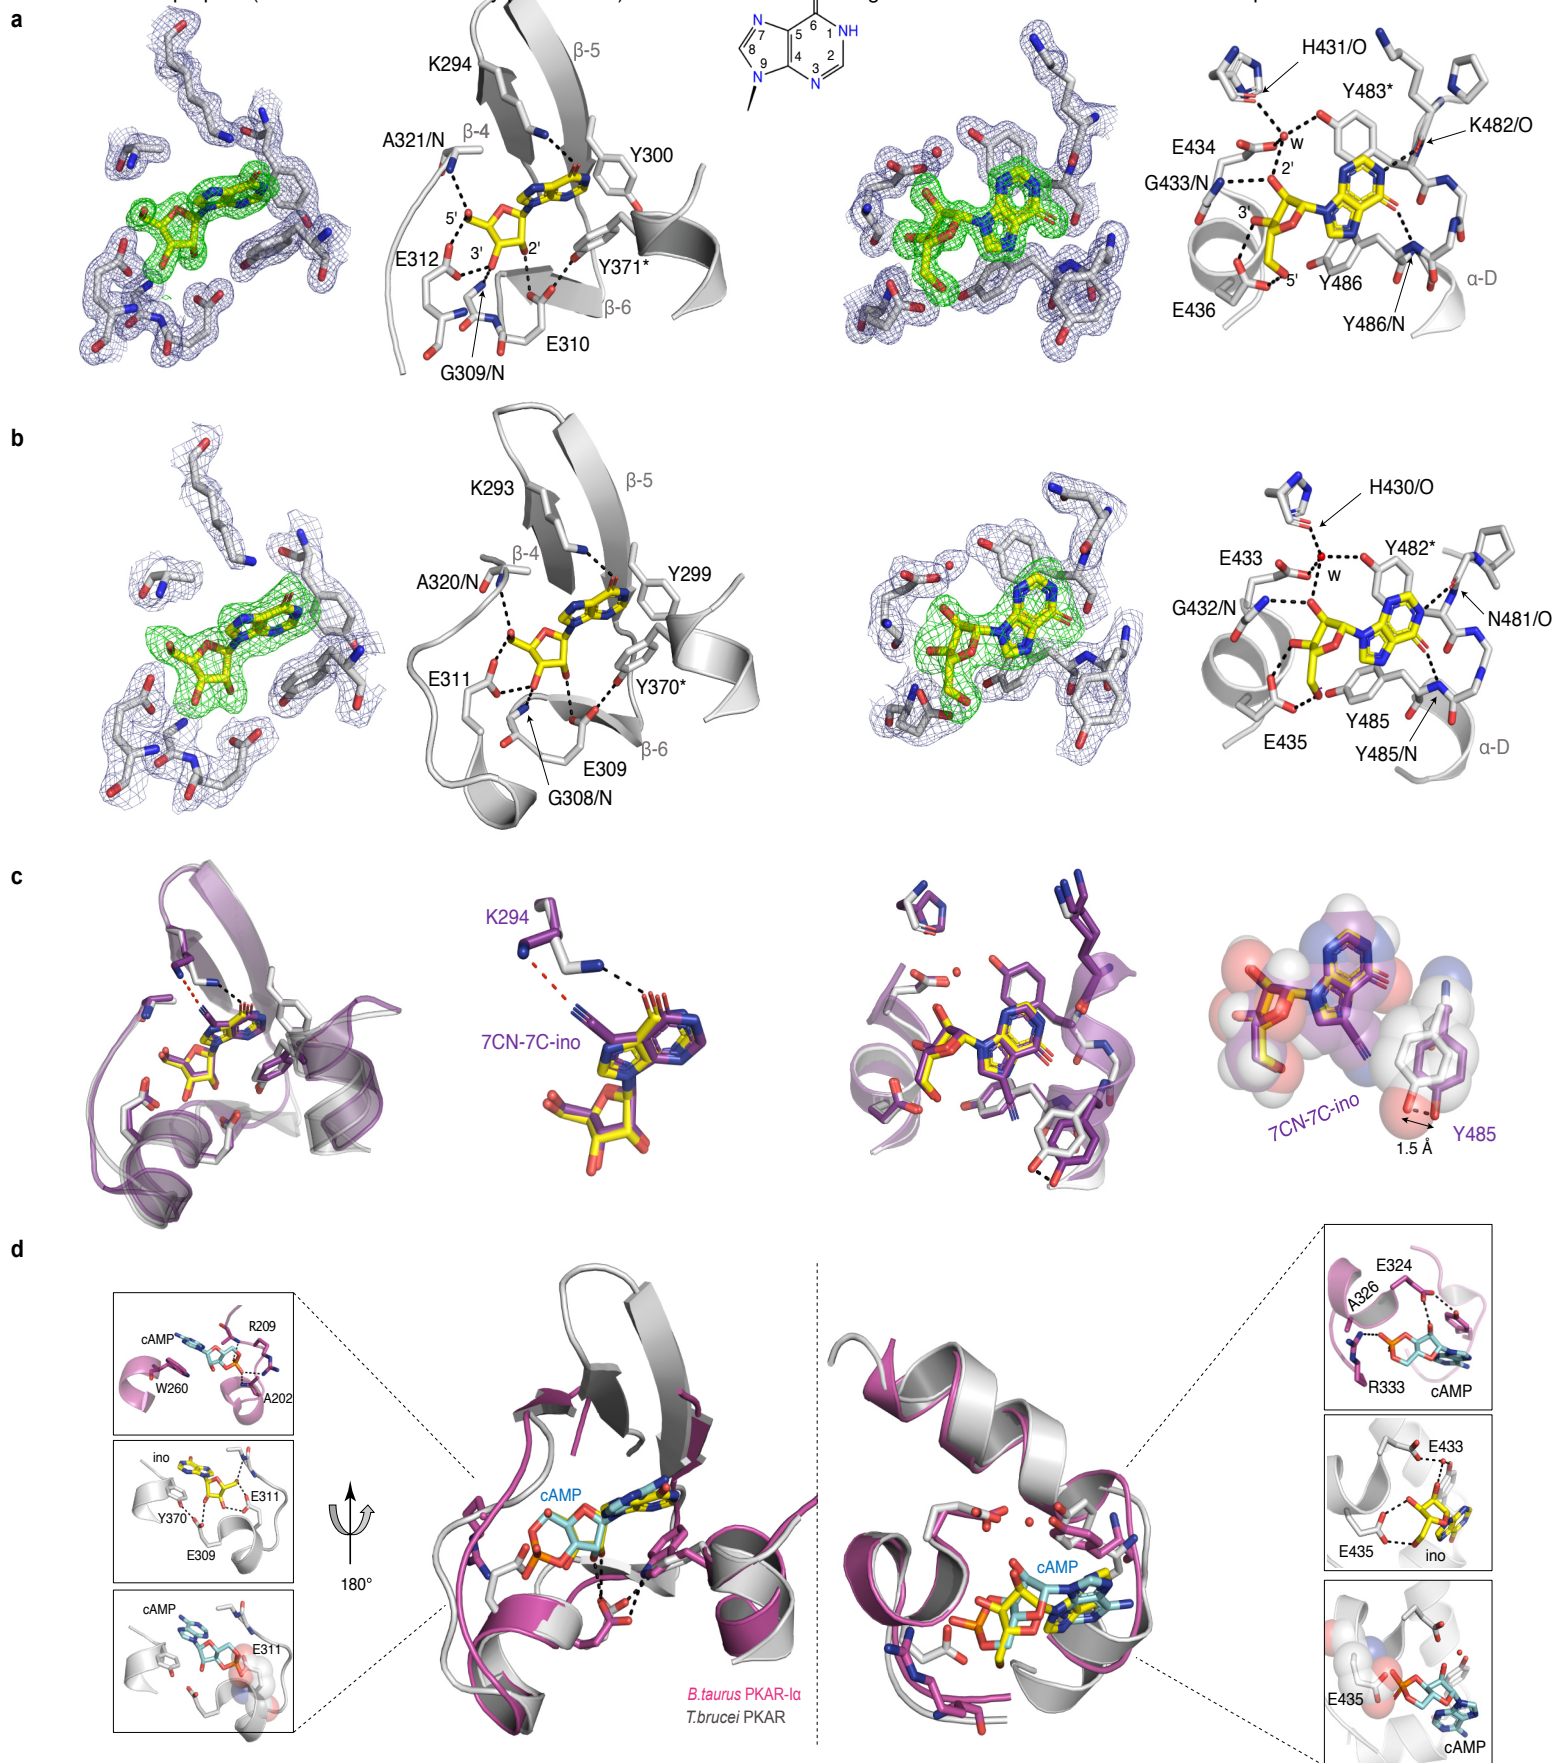

**Figure 2. Crystal structures of *T. cruzi* and *T. brucei* PKAR bound to inosine.**

**a** Electron density (ED) maps of site A (left) and site B (right) of *T. cruzi* PKAR(200-503) and corresponding ball and stick models of the hydrogen bond network around the bound inosine molecule. The inosine molecule was modelled into the omit map (Fo-Fc, 3 $\sigma$ , green) in each binding site. The surrounding protein atoms are shown together with a 2Fo-Fc map (1 $\sigma$ , dark blue). The black dashed lines represent hydrogen bonds ( $\leq 3$  Å cutoff). Residues G309; E310; E312 and A321 belong to Ribose Binding Cassette A (RBC-A), while G433; E434 and E436 are part of Ribose Binding Cassette B (RBC-B). Capping residues (Y371 and Y483) taking part in a  $\pi$ -stacking interaction with the hypoxanthine ring of inosine are marked with an asterisk. Purine ring nomenclature is shown in the middle. PDB: 6HYI. **b** *T. brucei* PKAR(199-499) displayed as in A, Residues G308, E309, E311 and A320 are part of RBC-A while G432, E433, and E435 belong to RBC-B. Capping residues (Y370 and Y482) are marked with an asterisk. PDB: 6FLO. **c** Structural alignment of inosine-bound *T. cruzi* PKAR (PDB: 6HYI; protein grey, inosine yellow) and 7-CN-7C-Ino-bound *T. cruzi* PKAR (PDB: 6FTF; protein and ligand in purple). The different ligand binding to K294 (A-site, left) and a 1.5 Å displacement of Y485 due to the bulky cyano group of 7-CN-7C-Ino (B-site, right) are shown at two magnifications. **d** Structural alignment of TbPKAR (PDB: 6FLO; protein grey, inosine yellow) and *B. taurus* PKAR1 $\alpha$  (PDB: 1RGS; protein magenta, cAMP cyan) for sites A (left) and B (right). In the blow-up panels, ligand-protein interactions are highlighted for the mammalian PKAR1 $\alpha$  (upper panel), TbPKAR (middle panel), and TbPKAR overlaid with the cAMP ligand of the aligned PKAR1 $\alpha$  structure. A clash between the exocyclic oxygens of cAMP and the side chain of glutamate residues (faded sphere-representation) is seen in both binding sites.

240 by glutamates highly conserved in the kinetoplastid PKARs. The arginine in PKAR $\alpha$   
241 neutralizes the negative charge of the phosphate in cAMP and also donates hydrogen bonds  
242 to the exocyclic oxygens of the cyclic phosphate. The glutamates in kinetoplastid RBCs  
243 interacts with the 3' and 5' OH groups of ribose. Moreover, the arginines 209/333<sup>PKAR $\alpha$</sup>  and the  
244 glutamates 311/435<sup>TbPKAR</sup> occupy the same spatial position in the structures (Fig. 2d). A  
245 superposition of the mammalian and *T. brucei* structures shows a clash between the  
246 phosphate group of cAMP and the negatively charged side chain of E311/435<sup>TbPKAR</sup> (Fig. 2d  
247 insets). The high-resolution crystal structures of *T. brucei* PKAR and *T. cruzi* PKAR thus  
248 provides a molecular rationale for absence of binding and activation by cAMP.

249

### 250 **Synthetic conversion of TbPKAR to cyclic nucleotide specificity**

251 To identify the structural determinants of ligand specificity, we introduced site-directed amino  
252 acid changes in TbPKAR to restore binding and activation by cyclic nucleotides. Three  
253 residues in each of the binding sites were mutated: E311A, T318R, V319A in RBC-A and  
254 E435A, N442R, V443A in RBC-B (mutant 1 in Table 2). In addition to the arginines and  
255 glutamates discussed above, a third position (V319/V443) that differs in kinetoplastid PKA  
256 compared to other eukaryotic PKAs (Mohanty et al. 2015; Bachmaier et al. 2019) was changed  
257 to alanine. The consensus PBC sequence of cAMP dependent PKAs (Canaves and Taylor  
258 2002) was thereby restored. Mutant PKAR subunits were co-expressed with *T. brucei* catalytic  
259 subunits in *Leishmania tarentolae*, and holoenzymes were tandem affinity purified. Kinase  
260 activation by nucleosides and cyclic nucleotides was measured (Table 2, Supplementary Fig.  
261 4). Mutant 1 restored kinase activation by cIMP ( $EC_{50}$  340 nM) and reduced activation potency  
262 of inosine >21.000-fold compared to WT. Thus, we confirmed that replacing these key residues  
263 was sufficient for conversion to cyclic nucleotide specificity. Activation by cAMP was also  
264 restored, but at lower activation potency ( $EC_{50}$  33  $\mu$ M). This corresponds to lower activation  
265 potency of adenosine compared to inosine for wild type TbPKA. The same ranking is also seen  
266 for the very low potencies of IMP, GMP and AMP (Tables 1 and 2). To confirm the binding

267 mode of cAMP to the converted binding site, mutant 6 of TbPKAR(199-499) carrying the triple  
268 replacements in site A was expressed in *E. coli* and co-crystallized with cAMP (Supplementary  
269 Fig. 3h, Supplementary Table 1). A molecule of cAMP was bound to site A and an inosine  
270 molecule (captured during expression in *E. coli*) to the unmodified site B (Fig. 3a). Structural  
271 similarity of mutant 6 to wild type TbPKAR was very high (Ca RMSD = 0.430 Å). All hydrogen  
272 bonds to cAMP observed in the PKAR1 $\alpha$  structure (PDB: 1RGS, Fig. 3b, right) were also  
273 present between cAMP and homologous residues in the A-site pocket of TbPKAR mutant 6  
274 (Fig. 3b, left and Supplementary Movie 2). The only remarkable difference is that cAMP binds  
275 in an *anti*-conformation in mutant 6 and in the *syn*-conformation in the mammalian PKAR. The  
276 E311A and V319A replacements created additional space inside the pocket to accommodate  
277 the bulky phosphate group of cAMP. An altered conformer of cysteine 278 and slight  
278 displacement of the loop between  $\beta$ -2 and  $\beta$ -3 in site-A allowed R318 to be accommodated so  
279 that it can interact with an exocyclic oxygen of cAMP (Supplementary Movie 2).

280 Simultaneous binding of cAMP and inosine to mutant 6 was supported by nanoDSF analysis.  
281 The refolded protein (APO form) had a low  $T_m$  measured by nanoDSF, but  $T_m$  raised by 14°C  
282 upon addition of cAMP and by 28°C upon addition of both cAMP and inosine (Fig. 3c). cAMP  
283 also stabilized the refolded mutant 6 protein during purification (Supplementary Fig. 3i,j).  
284 Correct refolding of this mutant was indicated by identical  $T_m$  after addition of cAMP plus  
285 inosine to native and refolded protein preparations and was confirmed by circular dichroism  
286 spectroscopy (Supplementary Fig. 3e). To evaluate role of individual amino acids in the  
287 “conversion set”, single and double mutations were introduced at equivalent positions in RBC  
288 A and RBC B of TbPKAR and co-expressed with the *T. brucei* catalytic subunit PKAC1 in  
289 *Leishmania tarentolae*. The tandem affinity purified holoenzymes were used for kinase assays  
290 to determine EC<sub>50</sub> values (Table 2, Fig. 3d, Supplementary Fig. 4). Replacement of positions  
291 318/442<sup>TbPKAR</sup> by arginines in both RBCs (mutant 4) was sufficient for response to cAMP (EC<sub>50</sub>  
292 24  $\mu$ M). To achieve cyclic nucleotide activation in the upper nM range the glutamates 311/435  
293 needed to be replaced by alanines as well in mutant 5 (Fig. 3d, Table 2). The potency of inosine



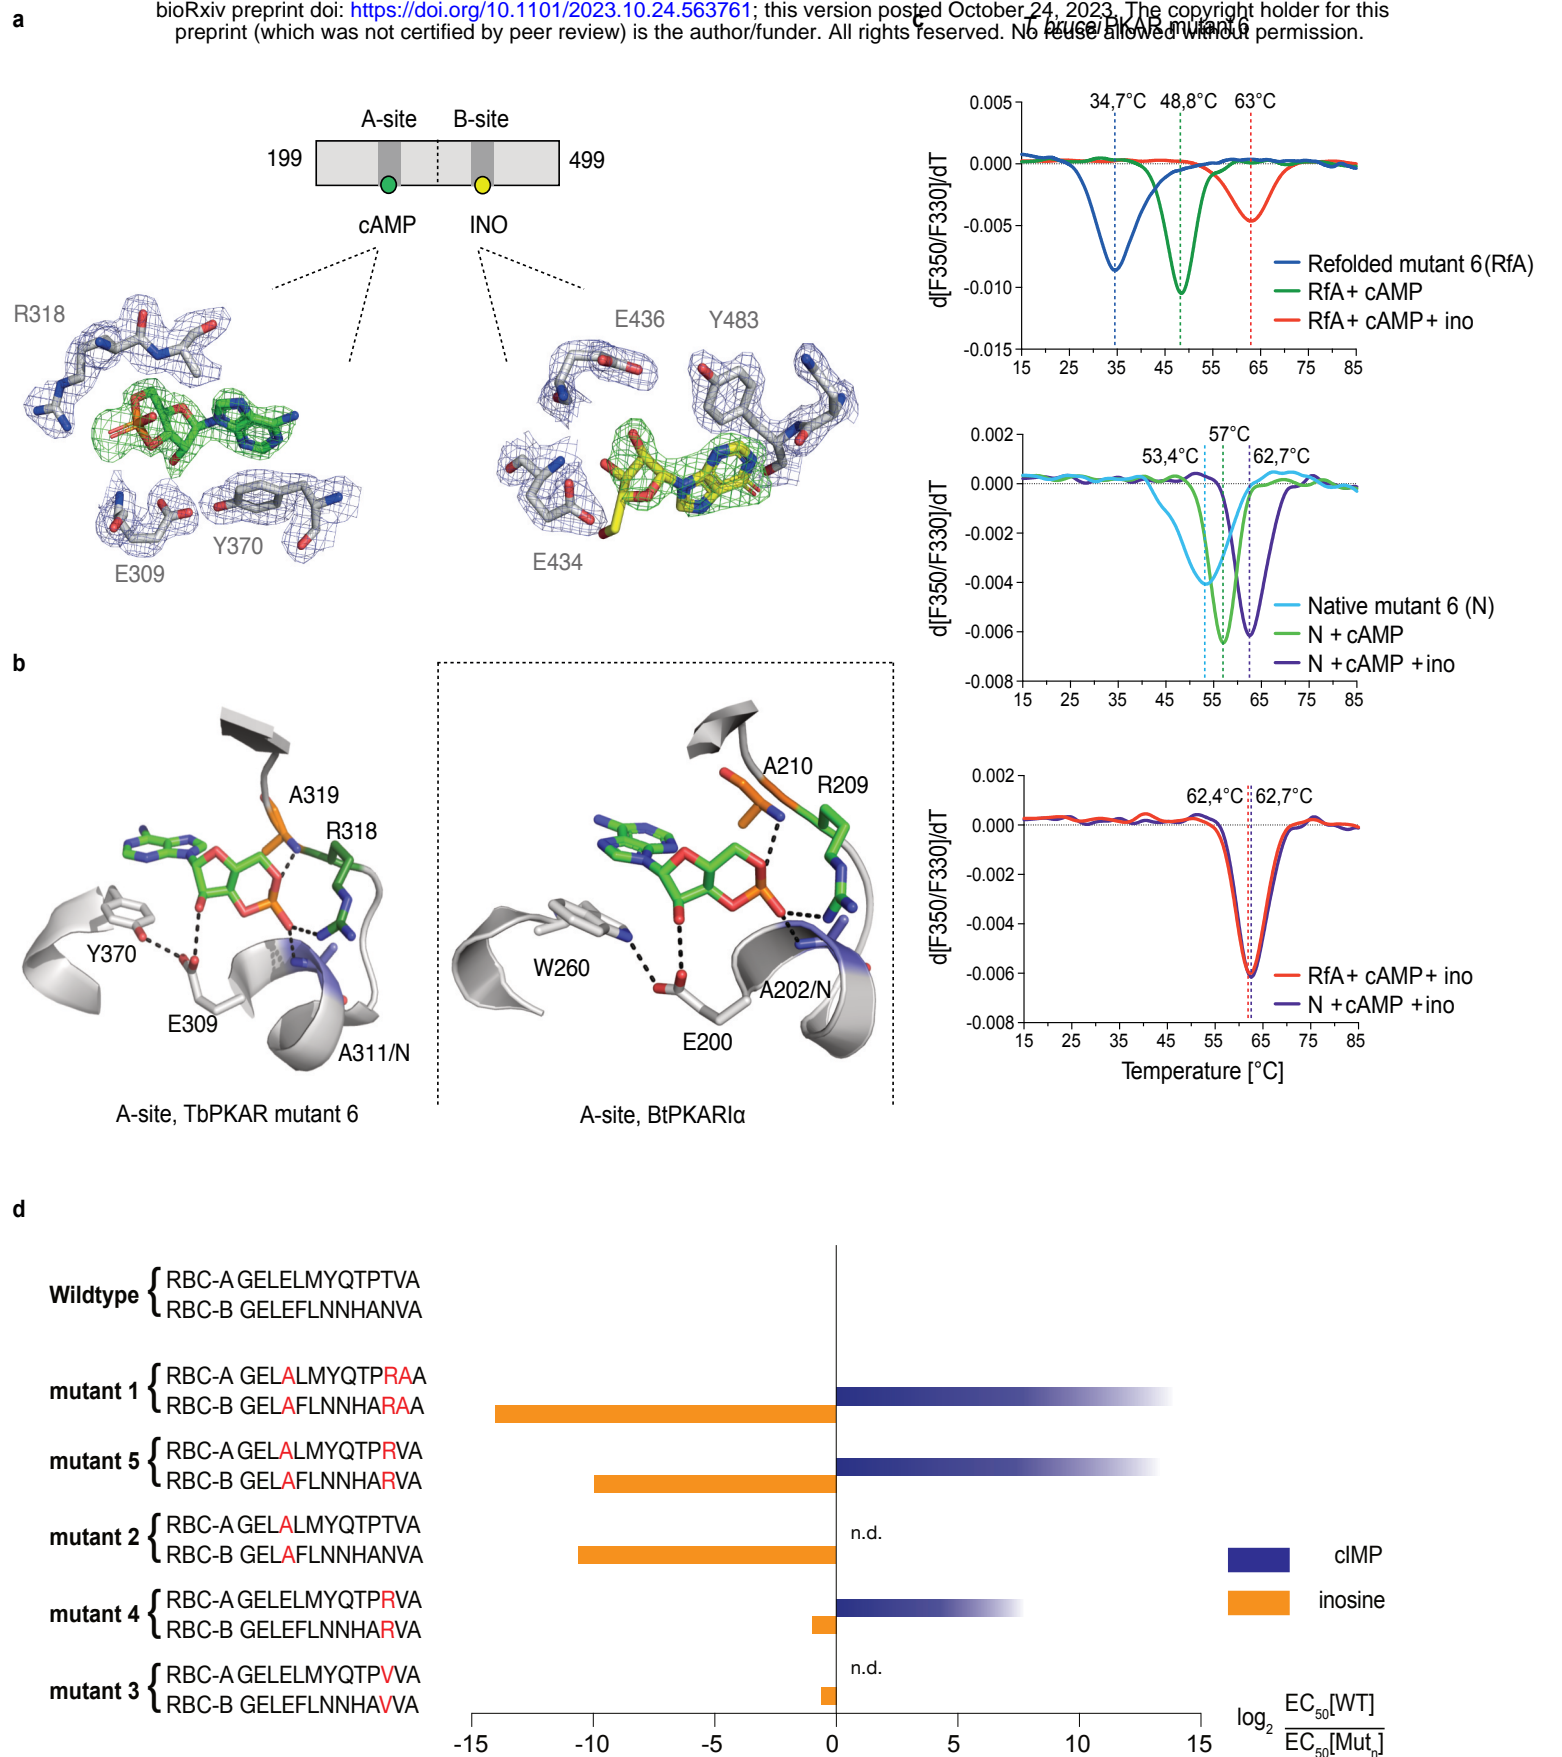

**Figure 3. Conversion of TbPKAR to cyclic nucleotide specificity.**

**a** Structure of ligand binding sites of TbPKAR(199-499) mutant 6 crystallized in presence of 1mM cAMP (Supplementary Fig. 3h, PDB: 6H4G). The scheme above the electron density map highlights binding of cAMP to site A and inosine to site B. Below, the electron densities show the protein atoms inside the 2Fo-Fc ( $1\sigma$ , dark blue) map and ligands inside the Fo-Fc omit map ( $3\sigma$ , green). **b** Structural comparison between the A pocket of TbPKAR(199-499) mutant 6 (left) and BtPKAR1 $\alpha$  (right, PDB: 1RGS). The point mutations in mutant 6 are coloured in purple (E311A), green (T318R) and orange (V319A). The same colour code was used for the corresponding amino acids in BtPKAR1 $\alpha$ . Hydrogen bonds (3Å) are indicated as dashed lines. **c** Thermal denaturation profiles (nanoDSF) of refolded APO (upper panel) and native mutant 6 TbPKAR(199-499) (middle panel) in the absence and presence of 1 mM ligands as indicated. The lower panel is a superposition of the thermal denaturation profiles of the two protein preparations (native and refolded APO) both incubated with 1mM cAMP plus 1mM inosine. **d** Mutational analysis of TbPKAR nucleoside binding sites. Relative kinase activation potency by inosine (orange) and cIMP (blue) is displayed as  $\log_2$  of the  $EC_{50}[WT]/EC_{50}[Mut_n]$  ratio on the x-axis. Since up to 5mM cIMP did not activate the WT, this value was taken as minimal estimate of  $EC_{50}[WT]$  for cIMP. This uncertainty propagating into the calculated ratio is indicated by a colour gradient at the right end of the columns. All data are taken from Table 2. Missing columns are not determined (n. d.). The sequences of RBC-A and RBC-B of mutants 1-5, with mutated amino acids highlighted in red, are shown on the left to the respective columns.

1196  
1197

**Table 2: Activation of mutant TbPKA holoenzymes by different ligands**

|                  | TbPKA holoenzyme                                 | EC <sub>50</sub> (95% CI)           |                                      |                               |                                      |                                |
|------------------|--------------------------------------------------|-------------------------------------|--------------------------------------|-------------------------------|--------------------------------------|--------------------------------|
|                  |                                                  | Inosine                             | cIMP                                 | Adenosine                     | Guanosine                            | cAMP                           |
| WT               | RBC-A -GELELMYQTPTVA-<br>RBC-B -GELEFLNNHANVA-   | 18 (13-22)<br>nM <sup>1</sup>       | - <sup>3</sup>                       | 5 (3-7) μM <sup>1</sup>       | 0.14 (0.08-<br>0.19) μM <sup>1</sup> | - <sup>3</sup>                 |
| Mut <sup>5</sup> |                                                  |                                     |                                      |                               |                                      |                                |
| 1                | RBC-A -GELALMYQTPRAA-<br>RBC-B -GELAFLLNNHARAA-  | 300 (160-<br>600) μM <sup>2</sup>   | 0.34<br>(0.2-0.7)<br>μM <sup>2</sup> | - <sup>3</sup>                | 370 (130-<br>1000) μM <sup>2</sup>   | 33 (26-45)<br>μM <sup>2</sup>  |
| 2                | RBC-A -GELALMYQTPPTVA-<br>RBC-B -GELAFLLNNHANVA- | 28 (23-35)<br>μM <sup>2</sup>       | nd <sup>6</sup>                      | nd                            | nd                                   | - <sup>4</sup>                 |
| 3                | RBC-A -GELELMYQTPVVA-<br>RBC-B -GELEFLNNHAVVA-   | 28 (15-37)<br>nM <sup>2</sup>       | nd                                   | nd                            | nd                                   | nd                             |
| 4                | RBC-A -GELELMYQTPRVA-<br>RBC-B -GELEFLNNHARVA-   | 36 (29-44)<br>nM <sup>2</sup>       | 24 (22-<br>26) μM <sup>2</sup>       | nd                            | nd                                   | - <sup>4</sup>                 |
| 5                | RBC-A -GELALMYQTPRVA-<br>RBC-B -GELAFLLNNHARVA-  | 18 (15-20)<br>μM <sup>2</sup>       | 0.5 (0.3-<br>0.6) μM <sup>2</sup>    | nd                            | nd                                   | 90 (71-115)<br>μM <sup>2</sup> |
| 6                | RBC-A -GELALMYQTPRAA-<br>RBC-B -GELEFLNNHANVA-   | 0.2 (0.16-<br>0.25) μM <sup>2</sup> | 14 (10-<br>25) μM <sup>2</sup>       | - <sup>3</sup>                | 1.2 (0.6-<br>2.6) μM <sup>2</sup>    | 25 (19-38)<br>μM <sup>2</sup>  |
| 7                | RBC-A -GELELMYQTPTVA-<br>RBC-B -GELAFLLNNHARAA-  | 1.1 (0.9-<br>1.4) μM <sup>2</sup>   | 7 (5-11)<br>μM <sup>2</sup>          | 21 (13-30)<br>μM <sup>2</sup> | 23 (17-32)<br>μM <sup>2</sup>        | - <sup>4</sup>                 |

1198  
1199  
1200  
1201  
1202  
1203  
1204  
1205  
1206

<sup>1</sup>mean half activation constants (EC<sub>50</sub>) and 95% confidence interval (95% CI) for ≥ 3 biological replicates

<sup>2</sup>mean half activation constants (EC<sub>50</sub>) and 95% confidence interval (95% CI) for technical triplicate of a single biological experiments

<sup>3</sup>no activation was detected up to a maximum concentration of 5mM

<sup>4</sup>no activation was detected up to a maximum concentration of 2mM

<sup>5</sup>number given to the respective mutant; site-directed mutations indicated in red

<sup>6</sup>not determined

294 was 1556-fold reduced by E311A/E435A<sup>TbPKAR</sup> (mutant 2) alone. In contrast, substituting the  
295 non-conserved amino acids at positions 318/442 by arginine (mutant 4) or a valine (mutant 3)  
296 did not have a significant effect on inosine response. The adjacent valine 319/443<sup>TbPKAR</sup> seems  
297 to contribute to activation by inosine 17-fold (compare mutants 1 and 5, Tab. 2 and Fig. 3d). In  
298 the B site this valine engages in hydrophobic interactions with the side chains of Y485 and  
299 K488, both belonging to the kinetoplastid-specific  $\alpha$ D helix that supports inosine binding by  
300 sealing the binding pocket (Supplementary Movie 3). The EC<sub>50</sub> values of all mutants tested  
301 were almost 100-fold higher for cAMP than for cIMP, not surprising as inosine is a much better  
302 activator compared to adenosine (Tables 1, 2).

303

#### 304 **The $\alpha$ D helix is required for high affinity binding to the B-site**

305 The binding and activation assays used so far average K<sub>D</sub> and EC<sub>50</sub> values over both the A-  
306 site and B-site of TbPKAR. As these sites are structurally not identical, we considered a  
307 kinetoplastid-specific feature of the B-site, the  $\alpha$ D-helix (Bachmaier et al. 2019). This is a  
308 helical extension of  $\alpha$ C beyond the small loop containing the capping residue Y482 at the end  
309 of  $\alpha$ C that stacks with the purine ring of inosine (Fig. 4a). In the ligand bound structures of  
310 TbPKAR and TcPKAR, this helix docks to the  $\beta$ -barrel of the B-site, covers the binding pocket  
311 and shields the ligand from solvent (Fig 4a, Supplementary Movie 4). Only one water molecule  
312 was found inside the binding pocket (Fig. 4a). Two tyrosine residues (Y484, Y485) in  $\alpha$ D are  
313 conserved in trypanosomatids, as are amino acids in the beta barrel of the B-site that are linked  
314 to these two amino acids via hydrogen bonds (Fig. 4b, c). Y484 interacts with the backbone of  
315 V443 and R413 while Y485 forms two hydrogen bonds to the side chains of N438 and H440  
316 (Fig. 4b). *In silico* structure relaxation (Fig. 4d) under an OPLS3 force field (Maestro-  
317 Schrödinger™) showed two histidines (H440, H430) engaging in salt bridge interactions with  
318 the ribose-binding glutamates (E433 and E435), together forming a stable structure on which  
319 the  $\alpha$ D-helix can dock (Fig. 4d). The beta factor representation of TbPKAR suggests that

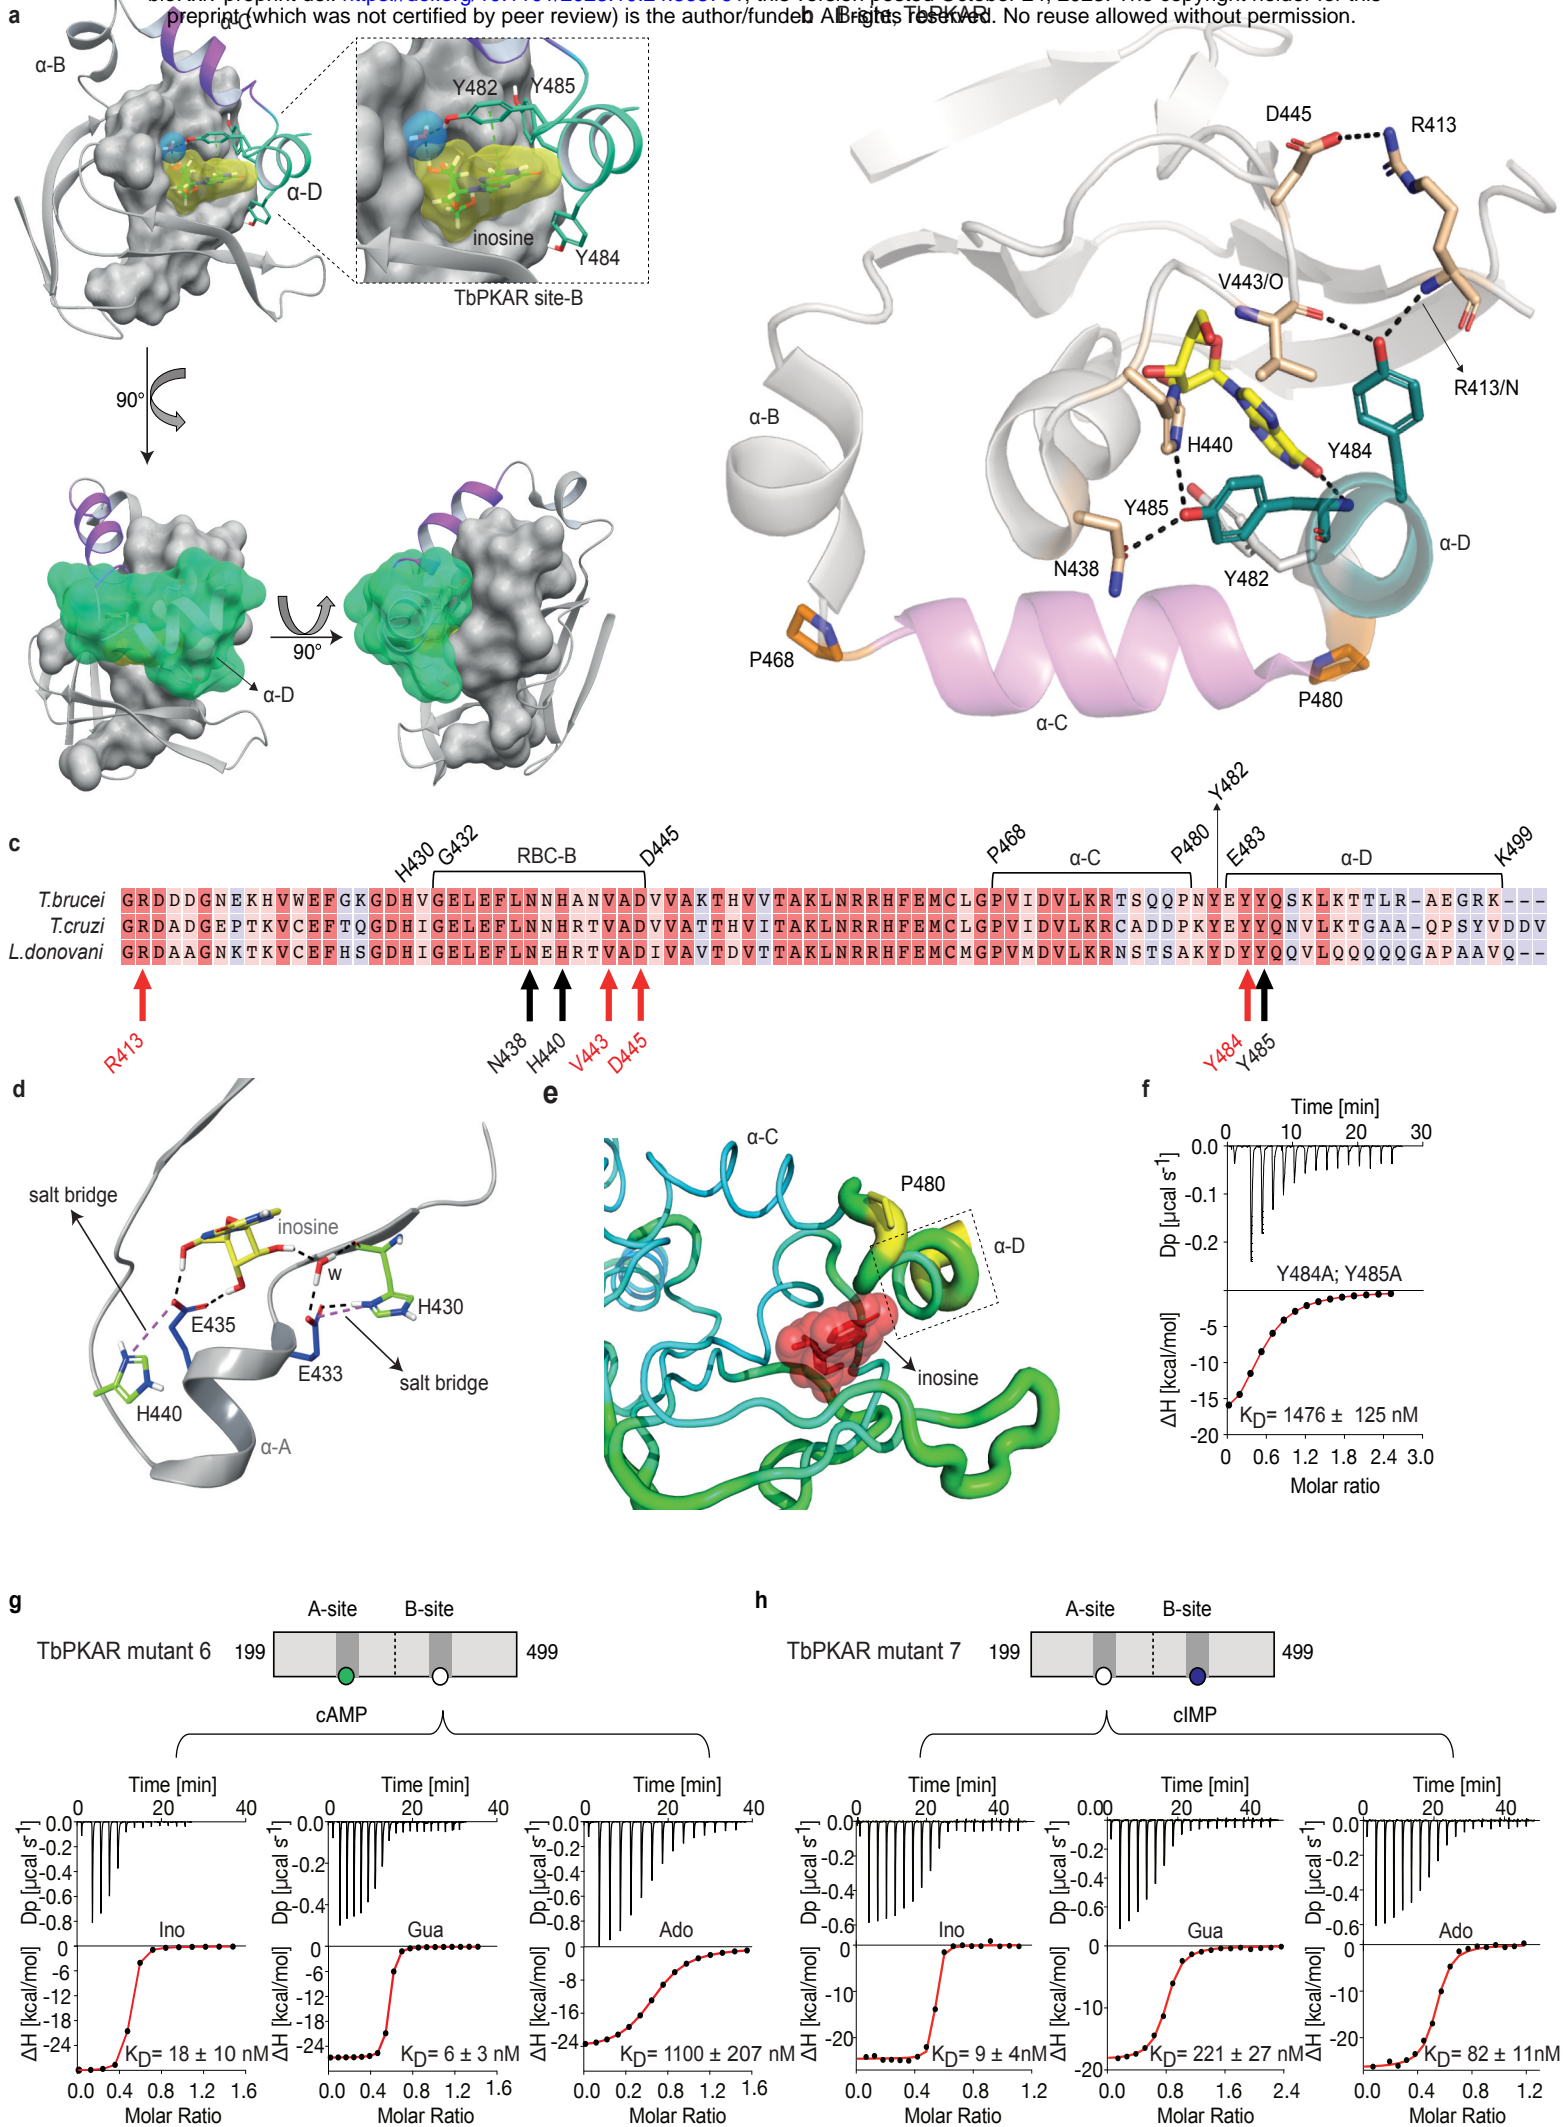

**Figure 4. The  $\alpha$ D helix of TbPKAR determines high binding affinity and ligand selectivity of the B-site**

**a** C-terminal helices  $\alpha$ B (grey),  $\alpha$ C (purple) and  $\alpha$ D (green) in CNB-B of TbPKAR, illustrating the lid-like position of the  $\alpha$ D helix. The ribose binding cassette (RBC, residues 432 to 445) is shown in surface representation (grey). Inosine (yellow) and one water molecule (blue) are sandwiched between RBC-B and the  $\alpha$ D helix (enlarged view in the blow-up panel). The  $90^\circ$  rotations of the structure show that the  $\alpha$ C and  $\alpha$ D helices are orthogonally positioned to each other. **b** The hydrogen-bond network formed between Y484 and Y485 in  $\alpha$ D helix and amino acids in the beta barrel of site B. Hydrogen bonds (3Å) are displayed as black dashed lines. **c** Sequence alignment of C-terminal domains from *T. brucei*, *T. cruzi* and *L. donovani* PKARs. Only TbPKAR numbering is shown. Red arrows mark residues involved in the hydrogen bond network with Y484, black arrows mark residues involved in the hydrogen bond network with Y485. **d** Extended network of hydrogen bonds and salt bridges (purple dashed lines) between two conserved histidines (H430 and H440) and the ribose-binding glutamates E433 and E435. **e** Beta factor representation of TbPKAR site B showing a higher overall atom displacement in the crystal structure of the  $\alpha$ D helix and in particular of P480. The Beta factor value increases from blue to red and from thin to thick, indicating an increase of atom displacement in the crystal. **f** Representative binding isotherm (ITC) for inosine binding to TbPKAR mutant 8 (mutant 6 with additional substitutions Y484A, Y485A). Data representation as in Fig. 1d, the  $K_D$  value is taken from Supplementary Table 2. **g, h** Representative binding isotherms (ITC) for mutant 6 refolded in presence of 1mM cAMP (g) and mutant 7 refolded in presence of 1mM cIMP (h). Data representation as in Fig. 1d, the  $K_D$  values are taken from Supplementary Table 2. For sequences of mutants see Table 2, for purity and non-aggregated state of R subunits see Supplementary Fig. 3j-l.



320 proline 480 functions as a hinge between  $\alpha$ C and  $\alpha$ D, as the average displacement of P480 is  
321 higher than that of the other residues around it, likely correlating with higher mobility (Fig. 4e).  
322 The  $\alpha$ D-helix might therefore function as a lid to close the pocket and determine ligand affinity.  
323 This hypothesis was confirmed by ITC measurements of inosine binding to the Y484A/Y485A  
324 double mutant (mutant 8). To selectively measure nucleoside binding to the mutated  
325 Y484A/Y485A B-site, the A-site was made unavailable for nucleoside binding by using  
326 TbPKAR mutant 6 as context and refolding of the protein occurred in the presence of cAMP  
327 (Supplementary Fig. 3 k). Mutant 8 shows an 82-fold decreased affinity for inosine (Fig. 4f,  
328 Supplementary Table 2). The  $\alpha$ D is therefore important for high binding affinity of 6-oxopurine  
329 nucleosides to the B-site.

330

### 331 **Site-selective binding and synergism of nucleosides**

332 The specific role of the  $\alpha$ D-helix in site B prompted us to investigate binding affinities and ligand  
333 specificity of both sites individually. As interdomain CNB-A to CNB-B contacts are important  
334 for the allosteric activation mechanism of mammalian PKAR (Akimoto et al. 2015; Berman et  
335 al. 2005; Kim et al. 2007; Malmstrom et al. 2015), we analysed the contribution of each site in  
336 the R-subunit context. Mutant 6 with site A converted to cyclic nucleotide specificity (E311A,  
337 T318R, V319A) was blocked by excess of cAMP during refolding and was used to measure  
338 nucleoside binding to the non-mutated site B (Fig. 4g, Supplementary Table 2). The  
339 corresponding mutant 7 with site B converted to cyclic nucleotide specificity was refolded in  
340 presence of cIMP to block this site and allow measurements of nucleoside binding affinity to  
341 the non-mutated A-site (Fig. 4h, Supplementary Table 2). Correct refolding of mutant 6 and 7  
342 was monitored by size exclusion chromatography and comparison of native and refolded  
343 protein by nanoDSF (Fig. 3c; Supplementary Fig. 3j, l-n). Inosine bound to mutants 6 and 7  
344 and to the wild type protein with similar high affinity ( $K_D$  9-18 nM). Adenosine had two orders  
345 of magnitude lower affinity for site B than inosine ( $K_D$  1.1  $\mu$ M) but displayed high affinity for site

346 A ( $K_D$  82 nM). In contrast, guanosine bound with highest affinity of all nucleosides to site B ( $K_D$   
347 6 nM), but with 36-fold lower affinity to site A ( $K_D$  221 nM). The preference of mutant 7 for cIMP  
348 over cAMP also reflects the B-site specificity for 6-oxo purines. *In silico* docking of inosine,  
349 guanosine and adenosine to site A and B of TbPKAR (PDB: 6FLO, chain B) using GLIDE  
350 (Friesner et al. 2004) provided an explanation for the much lower binding affinity of adenosine  
351 to the B-site. Differences in interaction of the respective purine bases with the  $\alpha$ D helix  
352 (Supplementary Fig. 6) include the hydrogen bonds of guanosine and inosine via the keto  
353 group at the C6 position to the backbone nitrogen of Y485. Since adenosine has an amino  
354 group in place of the C6 keto group, this specific interaction cannot take place. On the other  
355 hand, the C2 amino group of adenosine interacts with the keto group of N481 but apparently  
356 this interaction is not equivalently. Docking also suggests that the  $\alpha$ D helix connects to  
357 guanosine, inosine and adenosine via three, two and one hydrogen bonds, respectively  
358 (Supplementary Fig. 6) which is perfectly compatible with weaker binding of adenosine to the  
359 B-site (Fig. 4g). In the more solvent exposed site A, smaller differences in binding affinity of  
360 the three nucleosides (Fig. 4h) correspond to smaller differences in the Glide G scores  
361 (Supplementary Fig. 6). In summary, molecular docking is compatible with the ITC data  
362 showing 37-fold binding selectivity of guanosine over adenosine at the B-site and 13-fold  
363 binding selectivity of adenosine over guanosine at the A-site (Fig. 4g, h). An important  
364 implication of the site-selective binding of adenosine and guanosine is their possible synergism  
365 in kinase activation. This hypothesis was directly tested in kinase assays by determining the  
366 dose-response for adenosine in the presence of guanosine concentrations far below its  $EC_{50}$ .  
367 As seen in Fig. 5a, the dose response curves were clearly left shifted (up to 20-fold) by  
368 guanosine addition. Thus, adenosine can activate TbPKA in the nanomolar range upon co-  
369 stimulation by very low concentrations of guanosine.

370

371 **Allosteric kinase activation**

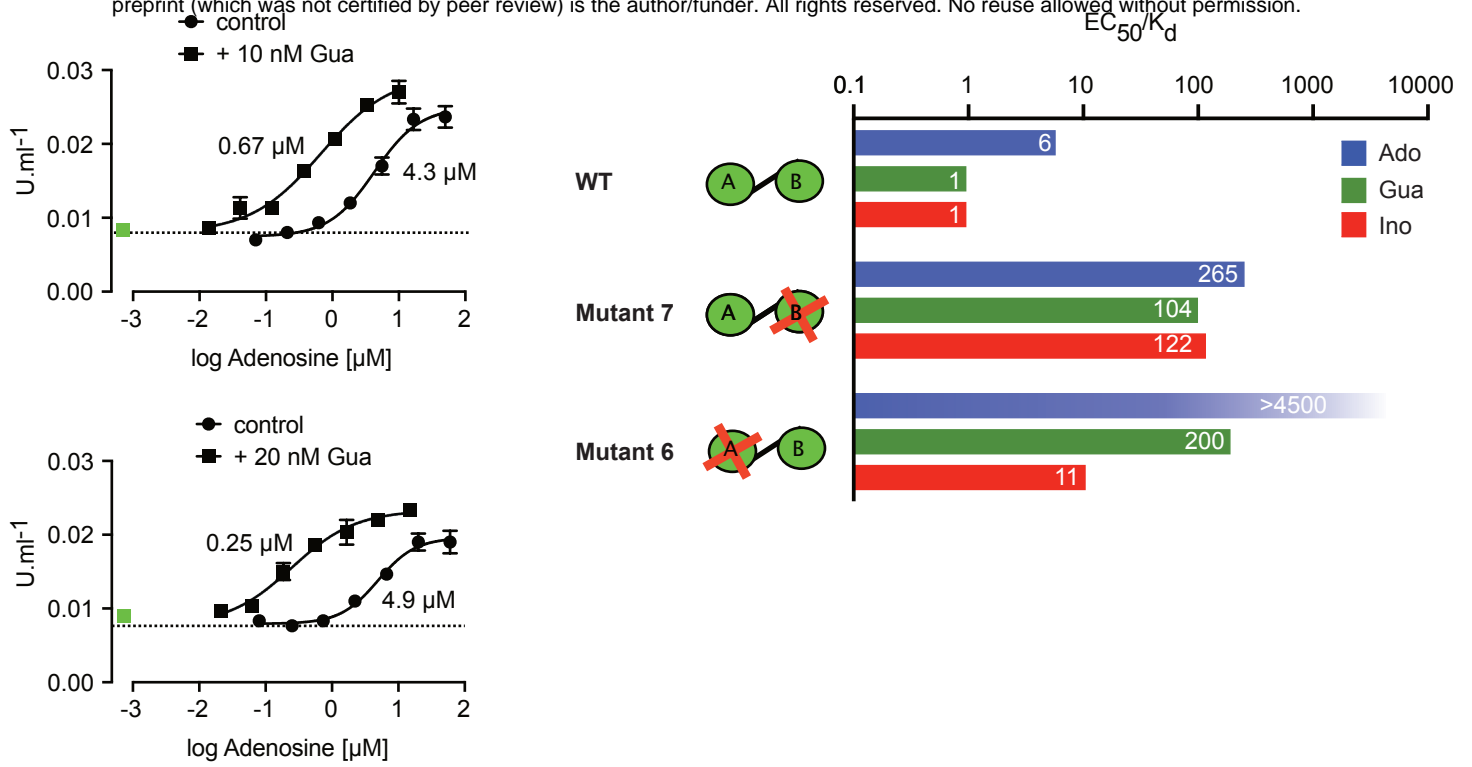

**Figure 5. Binding site selectivity and synergism of nucleosides.**

**a** Dose-response curves for kinase activation of TbPKA by adenosine in presence of 10nM or 20nM guanosine. Error bars are  $m \pm SD$  of technical triplicates, the calculated  $EC_{50}$  values are given next to the respective curve. Basal kinase activity in the absence of any ligand is indicated by a horizontal dashed line. A green square (placed outside the log scale) represents the control with guanosine (10 or 20nM) only.

**b** Ratio of kinase activation over binding affinity ( $EC_{50}/K_D$ ) for different purine nucleosides and individual binding sites A and B. Unavailable binding sites in mutants 6 and 7 are indicated by red crosses. Data are taken from Tables 2 and S2.

372 Comparing ligand binding data ( $K_D$ , Supplementary Table 2, Fig. 1d) and kinase activation  
373  $EC_{50}$  (Table 2, Fig. 1b) of WT TbPKA we noticed that these values did very well correspond to  
374 the high affinity B-site binders inosine and guanosine, whereas a 6-fold weaker activation is  
375 seen with adenosine that preferentially binds to the A-site. This indicates that the B-site is the  
376 gate keeper and that our data are compatible with the model of allosteric regulation established  
377 for mammalian PKA (Rehmann, Wittinghofer, and Bos 2007; Kim et al. 2007), where a  
378 conformational change upon B-site binding gives access to the ligand at the A-site. We then  
379 calculated the  $EC_{50}/K_D$  ratio (Fig. 5b) for mutants 6 and 7 with either the B-site or the A-site  
380 intact. Both mutants show a high ( $>100$ )  $EC_{50}/K_D$  ratio for nucleosides. This indicates that both  
381 binding domains are required in a ligand-bound conformation for efficient allosteric kinase  
382 activation by release of the catalytic subunit. The extreme ( $> 4500$ )  $EC_{50}/K_D$  ratio for adenosine  
383 and mutant 6 corresponds to the low affinity of adenosine to the B-site and confirms the role  
384 of that site in initiating the conformation change. The  $EC_{50}/K_D$  value of only 11 for mutant 6 and  
385 inosine is interpreted as weak binding of inosine to the mutated A binding site that we cannot  
386 exclude as the site is not blocked by cAMP in the kinase assays. Together, analysis of single  
387 binding site mutants and different nucleoside ligands in the context of the full length PKA  
388 provides strong support for conservation of an allosteric activation mechanism triggered by  
389 cooperative binding in hierarchical order, initiated by B-site binding.

390

### 391 **Ligands of trypanosome PKA *in vivo***

392 The biochemical and structural characterization of purified TbPKAR did not address the  
393 relative importance of the natural purine nucleosides for kinase activation *in vivo* in  
394 trypanosomes. The initial focus on inosine was due to the abundance of this nucleoside in *E.*  
395 *coli* and preloaded recombinant protein. We then quantified the loading of tagged PKAR with  
396 ligands upon rapid pulldown from *T. brucei* lysates. We expected at least a fraction of PKAR  
397 to be loaded with ligands due to the dynamic equilibrium between dissociated, ligand bound

**a**

Procyclic forms (PCF)

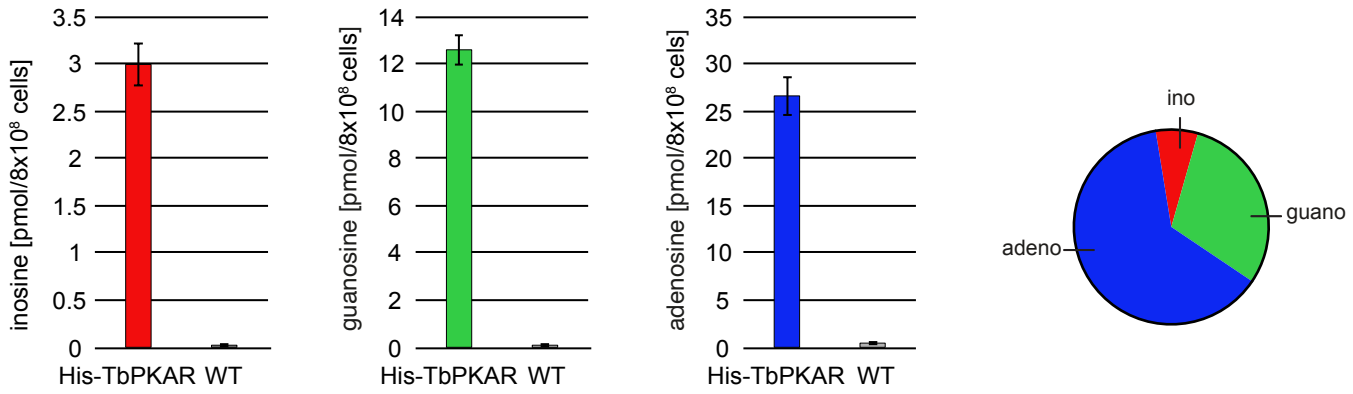

**b**

Blood stream forms (BSF)

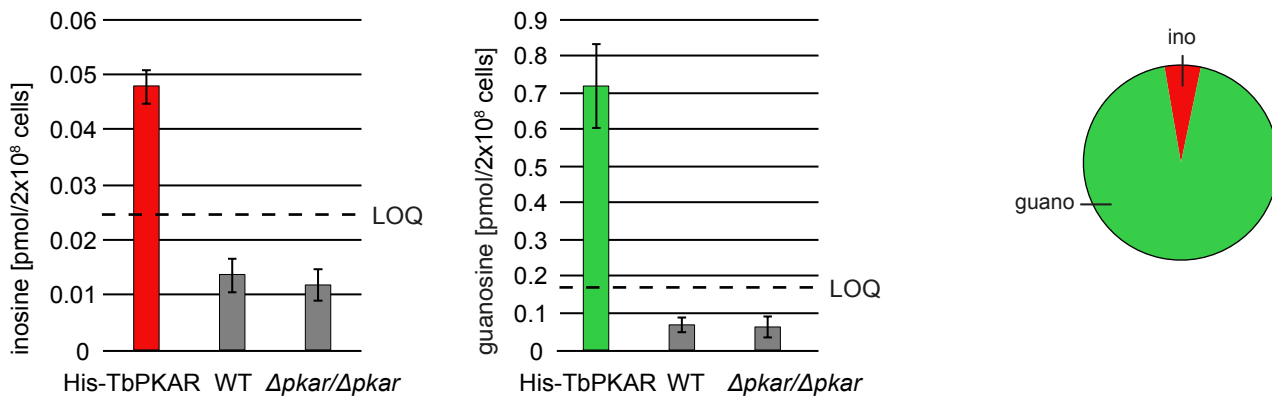

**Figure 6. Quantification of ligands bound to TbPKAR in lysed cells**

HPLC-MS based quantification of nucleoside amounts released from boiled His-tagged TbPKAR pulled down from lysed *T. brucei* (see Supplementary Fig. 7). Inosine (red), guanosine (green) and adenosine (blue) were quantified using stable isotope-labelled internal standards. Error bars indicate SD from three biological replicates. Note the different Y-axis scales. Pie charts on the right show the relative amounts of nucleosides detected and quantified. **a** Procyclic stage *T. brucei* strain EATRO1125 expressing His-TbPKAR and parental control cells. Pulled down nucleosides from the control cell line were in the range of water blanks. **b** Bloodstream stage *T. brucei* MITat 1.2 single marker line expressing His-TbPKAR, parental control cells and isogenic  $\Delta tbpkar/\Delta tbpkar$  cells devoid of endogenous PKAR. The limit of quantification (LOQ), defined by the linear part of the standard curves for stable isotope-labelled nucleoside references, is given by a dashed line. Adenosine was below the LOQ.

398 and C-subunit bound (holoenzyme complex) TbPKA. Tagged TbPKAR, but not endogenous  
399 TbPKAR was efficiently pulled down via the tag. Indeed, C subunits were co-purified, indicating  
400 only partial holoenzyme dissociation (Supplementary Fig. 7). Blood stream forms (BSF) and  
401 the procyclic fly vector stage of *T. brucei* (PCF) expressing tagged TbPKAR were used in these  
402 experiments and compared to matched isogenic wild type and  $\Delta pkar/\Delta pkar$  knock out controls.  
403 Nucleosides were released from PKAR bound to beads by boiling, then quantified by mass  
404 spectrometry using stable isotope labelled internal standards (Fig. 6, Supplementary Fig. 7).  
405 In the procyclic stage (PCF) the relative amounts of nucleosides detected in the bead fraction  
406 were 63% adenosine, 30% guanosine and 7% inosine (Fig. 6a, Supplementary Fig. 7a). In the  
407 bloodstream stage (BSF) 94% guanosine, 6% inosine and only background level of adenosine  
408 were found (Fig. 6b, Supplementary Fig. 7b). A priori the MS method did not exclude the  
409 additional presence of an unknown endogenous ligand of TbPKAR in trypanosomes. However,  
410 careful searches of the MS data sets for all known modified nucleosides detected in living  
411 systems from the MODOMICS database (Boccaletto et al. 2018) did not return significant hits  
412 absent in the blank (Supplementary data 1). Thus, we propose that the nucleosides guanosine,  
413 adenosine and possibly inosine are endogenous ligands and likely activators of  
414 trypanosomatid PKA, probably acting synergistically.

415

## 416 **Discussion**

417

418 PKA was the first protein kinase studied at the structural and mechanistic level and became a  
419 paradigm for allosteric kinase regulation by ligands (Taylor et al. 2012; Taylor et al. 2021). It is  
420 highly conserved through evolution, including its activation by cAMP and present in most  
421 species, except plants. Here we show that in the phylogenetically distant protozoan group  
422 *Trypanosomatida* nucleosides have replaced cyclic nucleotides as ligands of PKA. Inosine,  
423 guanosine and adenosine bind with high affinity to the regulatory subunit PKAR and efficiently  
424 activate PKA of *Trypanosoma brucei*, *Trypanosoma cruzi* and *Leishmania spp.* Site-selective  
425 binding affinities and synergism of guanosine and adenosine suggest a new second  
426 messenger signalling pathway or nucleoside sensing mechanism in *Trypanosomatida*.

### 427 **The CNB domain - a versatile ligand binding domain**

428 In trypanosomatid PKAR orthologs, few residues in each CNB domain systematically deviate  
429 from the consensus of the cyclic nucleotide binding motif (Mohanty et al. 2015; Canaves and  
430 Taylor 2002). By mutagenesis of these residues (E311, T318, V319 in RBC A and E435, N442,  
431 V443 in RBC B of TbPKA) we were able to restore binding and kinase activation by cyclic  
432 nucleotides and structurally interpret the determinants of altered ligand specificity. Whereas  
433 the crystal structures predict that the most critical glutamates E311<sup>RBC:A</sup> and E435<sup>RBC:B</sup> required  
434 for nucleoside binding preference would clash with the cyclic phosphate of cAMP (Fig. 2d),  
435 kinase activation at high concentration suggests that this incompatibility is not absolute (mutant  
436 4, Fig. 3d), as expected for a dynamic structure *in vivo*. Cyclic nucleotide binding domains  
437 (CNB) are present in most species and in a broad variety of proteins, reaching from protein  
438 kinases (Diller et al. 2001; Su et al. 1995) to ion channels (Zagotta et al. 2003) and transcription  
439 factors, such as the catabolite activator protein (CAP) in bacteria (Kannan et al. 2007; Passner  
440 and Steitz 1997). The ancient CNB fold has been described as core module for allosteric  
441 regulation by cyclic nucleotides (Berman et al. 2005; Kannan et al. 2007). Here we propose  
442 that the CNB is a module for allosteric regulation by a broader spectrum of small ligands. This

443 is reminiscent of other families of ligand binding proteins like the G-protein coupled receptors  
444 or steroid hormone binding domains in transcription factors that have been initially  
445 characterized by a limited set of ligands. Diverse ligands have later been identified for the  
446 “orphan” members of those families (Davenport et al. 2013). Future investigations might  
447 identify additional CNB domain ligands also outside the *Trypanosomatida* group.

448 In contrast to residues important for ligand specificity, the  $\pi$ -stacking interaction by the so  
449 called capping residues (Wu et al. 2004; Kim et al. 2007) with the purine ring of cAMP or  
450 nucleosides are well conserved between mammalian and trypanosomatids. Single mutations  
451 of the mammalian PKA capping residues W260<sup>R1 $\alpha$ :CNB-A</sup> or Y371<sup>R1 $\alpha$ :CNB-B</sup> that interact with cAMP  
452 reduced activation potency by 4.6 and 9-fold, respectively and influence the cooperativity of  
453 the two binding sites (Kim et al. 2007). The importance of stacking interactions with Y371 in  
454 site A and Y482 in site B of TbPKAR explains why allopurinol riboside, a purine derivative very  
455 similar to inosine with reduced delocalized electron system, is 120-fold less potent than inosine  
456 (Table 1).

457 The biochemical and structural evidence for a distinct ligand specificity of trypanosomatid PKA  
458 that is provided here, will resolve a very controversial issue: whereas difficulties to detect  
459 cAMP-dependent kinase activity in *T. brucei* and *Leishmania* were reported long ago (Walter  
460 1978; Banerjee and Sarkar 2001), cAMP regulation of *T. cruzi* and *Leishmania* PKA activity  
461 and binding of cAMP to LdPKAR1 in the  $\mu$ M range have been proposed by others (Huang et  
462 al. 2006; Bhattacharya, Biswas, and Das 2012). Our data contradict the latter reports and  
463 possible technical reasons have been discussed previously (Bachmaier et al. 2019; Bachmaier  
464 and Boshart 2013).

#### 465 **The tail makes the affinity difference**

466 The very high affinity of nucleosides to the B-site was surprising as the ionic interaction of the  
467 cyclic phosphate deep in the pocket is important for strong binding of cAMP in mammalian  
468 PKA (Su et al. 1995; Herberg, Taylor, and Dostmann 1996). The C-terminal extension ( $\alpha$ D  
469 helix) is so far only found in trypanosomatid PKAR and contains the conserved sequence



470 (K/N)YxYY. Our crystal structures show that this helix covers the B binding site in the ligand  
471 bound state like a lid and shields the ligand from solvent (Supplementary Movie 4). Inside the  
472 binding pocket, the capping residue (Y482)  $\pi$ -stacks with the purine ring that may additionally  
473 engage in T-shape  $\pi$ -stacking interaction with Y484 and Y485 from the  $\alpha$ D helix (Fig. 4b). C-  
474 terminal extensions are found in some PKAR subunits e.g. RII $\beta$  (PDB: 1CX4) (Diller et al.  
475 2001) or *Plasmodium falciparum* PKAR (PDB: 5K8S) (Littler et al. 2016). These differ from the  
476  $\alpha$ D helix in that they just seem to prolong the  $\alpha$ C helix. In contrast, the  $\alpha$ D helix is separated  
477 from  $\alpha$ C by a proline resulting in a kink that positions the  $\alpha$ D helix on top of the binding pocket  
478 to which it is attached by multiple hydrogen bonds donated by the conserved tyrosines Y484  
479 and Y485 (Fig. 4b). Consequently, the Y484A/Y485A mutation reduced the binding affinity for  
480 inosine to site B drastically. The  $\alpha$ D helix lid mechanism may compensate for the weaker bonds  
481 of the ribose moiety of nucleosides deep in the pocket, whereas cAMP binding is stabilized by  
482 a strong ionic interaction with the phosphate in cAMP dependent PKARs.

### 483 **Site selectivity and synergism of nucleosides**

484 The binding data for trypanosomatid PKARs show a clear affinity ranking of the three purine  
485 nucleosides:  $K_D(\text{ino}) < K_D(\text{guano}) < K_D(\text{adeno})$ . The preference of inosine and guanosine over  
486 adenosine is most striking for the B-site. The structures and molecular docking show that the  
487  $\alpha$ D-helix contributes to the high affinity of guanosine and inosine, as in contrast to the adenine  
488 base, the 6-oxopurines can form several hydrogen bonds to the  $\alpha$ D-helix. This preference is  
489 also seen as a 97-fold difference in kinase activation between cIMP and cAMP in mutant 1  
490 (Tab. 2). Initially, binding of nucleosides to TbPKAR and LdPKAR1 was measured with  
491 recombinant proteins containing the complete C-terminus with both CNB domains. This  
492 averages over the affinity of two binding sites. To determine single binding site affinities,  
493 previous work on mammalian PKA used individual expressed CNB domains (Moll et al. 2007;  
494 Lorenz et al. 2017). Here we blocked either the A (mutant 6) or B site (mutant 7) of TbPKAR  
495 by conversion to cyclic nucleotide specificity to measure binding to the other site in the context  
496 of the intact protein. This strategy reduces the risk of protein truncation artefacts, but we are

497 aware of the limitation of measuring binding to a “primed” protein (the other binding site is  
498 occupied). The true affinity to the B-site of the holoenzyme (APO) form available *in vivo* cannot  
499 be easily determined. This in mind, a strong site preference of adenosine for site A and  
500 guanosine for site B was observed, whereas inosine bound equally to both sites (Tab. S2).  
501 The  $\alpha$ D-helix seems important for guanosine preference in site B (see above), but single amino  
502 acids contributing to adenosine preference in site A could not be identified by *in-silico* docking  
503 experiments (Supplementary Fig. 6). A co-crystal structure of TbPKAR with adenosine is not  
504 yet available. The site selective binding of adenosine and guanosine to sites A and B,  
505 respectively, of *T. brucei* PKAR is reminiscent of site selectivity of cAMP or cGMP analogues  
506 for mammalian PKAR. A synergistic effect on kinase activation of these synthetic compounds  
507 was exploited for development of potential anti-proliferative drugs (Schwede et al. 2000; Cho-  
508 Chung et al. 1989; Huseby et al. 2011; Gausdal et al. 2013). Priming mammalian RI and RII  
509 isoenzymes with B-site selective cyclic nucleotides led to an increase of activation potency of  
510 A-site selective compounds (Ogreid et al. 1989; Dostmann et al. 1990; Corbin et al. 1986). We  
511 observed a comparable synergistic effect upon priming of TbPKA with 10-20 nM of the B-site  
512 selective guanosine, resulting in a 6-20-fold shift in activation potency by the A-site selective  
513 adenosine. In contrast to pharmacological synergism of drugs acting on mammalian PKA, the  
514 synergism of two endogenous ligands present in trypanosomes may have *in vivo* relevance by  
515 providing a logical AND switch to respond to and integrate over the two most important purine  
516 nucleosides in the cell.

### 517 **Allosteric regulation of PKA**

518 A detailed model for the allosteric activation mechanism of mammalian PKA has been  
519 elaborated over many years (Su et al. 1995; Kim et al. 2007; Taylor et al. 2021; Rehmann,  
520 Wittinghofer, and Bos 2007). Is this activation mode also applicable to the nucleoside  
521 dependent PKA of trypanosomatids? The crystal structures of inosine bound TbPKAR and  
522 mammalian PKAR1 $\alpha$  (PDB: 1RGS) are highly homologous (rms = 3.2 Å). Key sequence  
523 features implicated in the allosteric regulation, such as the salt bridge (E371, R475<sup>TbPKAR</sup>)

524 keeping the B/C helix extended in the apo conformation, the capping residues (Y370 and  
525 Y482) that participate in ligand binding by  $\pi$  stacking (Kim et al. 2007; Wu et al. 2004) as well  
526 as residues involved in R-C interaction e. g. the inhibitory sequence (RRTTV, res. 201-206 in  
527 TbPKAR) (Kim, Xuong, and Taylor 2005; Kim et al. 2007) are conserved. The binding and  
528 kinase activation data for single site mutants of TbPKA (Fig. 5b) clearly show that nucleoside  
529 binding to both sites is required for efficient kinase activation and suggests that the B-site has  
530 a “gatekeeper” function that initiates the conformational change and leads to accessibility of  
531 the A-site, like in mammalian PKA. Subsequent ligand binding to the A-site then triggers  
532 dissociation of the catalytic subunit (Herberg, Taylor, and Dostmann 1996; Kim, Xuong, and  
533 Taylor 2005; Kim et al. 2007) and thereby releases the kinase from (auto)inhibition. The results  
534 of our single site mutant analysis of TbPKA (Fig. 5b) are perfectly compatible with this model.  
535 Therefore, the basic allosteric mechanism seems to be conserved and may predate in  
536 evolution the separation of PKA into different CNB ligand specificities. More insight into the  
537 conformational detail of kinase activation by nucleosides will require the structure of a  
538 trypanosomatid PKA holoenzyme complex.

### 539 **Nucleosides as second messengers?**

540 Inosine, guanosine and adenosine were shown to bind to TbPKAR *in vivo* (Fig. 6), whereas  
541 no compounds from an exhaustive list of nucleoside analogues previously identified in living  
542 organisms (MODOMICS database) (Dunin-Horkawicz et al. 2006; Boccaletto et al. 2022;  
543 Boccaletto et al. 2018) did match MS spectra from pulled down bound material (Supplementary  
544 data 1). We may have missed a low affinity or labile ligand not captured by the pulldown  
545 procedure. However, in favour of a second messenger role of nucleosides, their binding  
546 affinities and activation potencies match well the affinity and potency of cAMP for mammalian  
547 PKA (Fig.1, Table 1, Supplementary Table 2). In contrast, an unidentified second messenger  
548 would compete with the nucleosides in the cell and therefore require even higher affinity.  
549 Reconciling a second messenger function with the role of metabolites in the cell seems less of  
550 a conceptual problem. First, an increasing number of metabolites with signalling function

551 emerge (Baker and Rutter 2023) and second, subcellular compartmentalization of signal  
552 generation/degradation is well established for cAMP signalling and PKA that act mostly in  
553 microdomains (Buxton and Brunton 1983; Zaccolo, Zerio, and Lobo 2021; Paolocci and  
554 Zaccolo 2023; Musheshe, Schmidt, and Zaccolo 2018). In fact, PKA of the trypanosomatid  
555 species analysed here is predominantly localized in the flagellum (Bachmaier et al. 2016;  
556 Oberholzer et al. 2011; Billington et al. 2023), a confined compartment that serves as sensory  
557 organelle of the cell (Bachmaier et al. 2022; Ooi and Bastin 2013; Oberholzer et al. 2010). The  
558 subcellular distribution of nucleosides in trypanosomes is not known and no values for total  
559 guanosine and inosine per cell are available in the literature. Only adenosine was measured  
560 in the bloodstream stage of *T. brucei* in the range of 12-28  $\mu$ M depending on the growth  
561 medium (Kim et al. 2015). Taking the binding affinities into account, the relative amounts of  
562 bound nucleosides pulled down with TbPKAR from cell lysates (Fig. 6) can be used as proxy  
563 for relative nucleoside concentrations in the cell. Only a small fraction of PKAR bound inosine  
564 *in vivo* in both life cycle stages, indicating that this high affinity binder is not readily available  
565 for PKAR in the parasites. This is in contrast to *E. coli* where inosine seems more abundant  
566 (extrapolated from Bennett et al. (2009)) resulting in inosine bound to trypanosomatid PKAR  
567 when expressed in this heterologous system. In *T. brucei* bloodstream forms guanosine was  
568 captured but adenosine remained below the level of detection (Fig. 6). In procyclic forms  
569 guanosine and adenosine were both captured by PKAR, indicating a much higher  
570 adenosine/guanosine ratio in this life cycle stage. Based on these estimations, guanosine  
571 seems to be the primary physiological ligand in BSF, whereas adenosine and guanosine likely  
572 synergize to activate PKA in PCF (Fig. 5a). Most PKAR pulled down from PCF would then  
573 have adenosine in the A-site and guanosine in the B-site.

574 PKA might also serve as an intracellular nucleoside gauge. Trypanosomes are purine  
575 auxotroph and require sensitive regulation of purine uptake (Rico-Jimenez et al. 2021). A third  
576 hypothesis suggests that physiological activation of the kinase holoenzyme *in vivo* is co-  
577 triggered by nucleoside binding and a second allosteric mechanism, for example, a

578 posttranslational modification or a protein-protein interaction may shift the affinity or may be  
579 required for the final conformational change upon binding (Khamina et al. 2022). This would  
580 allow kinase regulation without signal-related changes of the intracellular nucleoside  
581 concentrations. This synergism hypothesis is inspired by the role of specific phosphorylations  
582 of mammalian PKA (Haushalter et al. 2018) and the phenomenon of allosteric pluripotency  
583 described for the analogue Rp-cAMP, that acts as an inhibitor or activator depending on  
584 MgATP concentrations (Dostmann and Taylor 1991; Byun, Akimoto, et al. 2020).  
585 Mechanistically, the opposite effects of Rp-cAMP are explained by formation of energetically  
586 stabilized mixed intermediate states of the kinase, in which CNB-A and CNB-B adopt different  
587 conformational states (Byun, VanSchouwen, et al. 2020; Akimoto et al. 2015). Similar  
588 intermediate states were also reported for *Plasmodium falciparum* PKG (Byun, Van, et al.  
589 2020). Models for activation of the kinetoplastid PKA remain speculative as long as the  
590 upstream signalling that leads to PKA activation *in vivo* has not been elucidated in these  
591 organism. Future research will use kinase activation as readout for genome-wide screening to  
592 detect upstream pathway components regulating the nucleoside-dependent PKA.  
593

594 **Acknowledgements**

595 We thank Thomas Carell, LMU Chemistry, for generous support of S.B., MS instrument time  
596 and discussions, Ralph Heermann, LMU Microbiology, and Michaela Smolle, LMU BMC, for  
597 advice, and Andreas Anger, LMU Gene Center for structural homology modelling in the early  
598 phase of the project. Eleni Polatoglou launched Y.V.S. in the laboratory. Access to nanoDSF  
599 instruments and advice was generously provided by NanoTemper Technologies GmbH  
600 (Munich, Germany). We are grateful to Ricardo Biondi, IBIOBA, Buenos Aires for critical  
601 reading of the manuscript. The work was supported by the Bundesministerium für Bildung und  
602 Forschung (BMBF) grant 16GW0281K to M.B. Y.V.S. was supported by a fellowship from the  
603 Brazilian Science Without Borders/CNPq program and by the Life Sciences Munich (LSM)  
604 graduate school.

605

606 **Author Contributions**

607 Conceptualization [MB, GG, YVS]; Methodology [JB, SB]; Formal analysis [VO, GG, YVS,  
608 SB, MB]; Investigation [VO, GG, YVS, SB, GM]; Resources [FS]; Data curation [JB]; Writing  
609 – original draft preparation [VO; YVS; GG; MB]; Writing- review & editing [VO; YVS; MB];  
610 Supervision [EL, MB]; Funding acquisition [MB]

611

612

## 613 **Materials and Method**

### 614 **Preparation of PKA holoenzymes and kinase assay**

615 *T. brucei* PKAR/PKAC1 (TriTrypDB: Tb927.11.4610 and Tb927.9.111100); *T. cruzi*  
616 PKAR1/PKAC2 (TriTrypDB: TcCLB.506227.150 and TcCLB.508461.280), *L. donovani*  
617 PKAR1/PKAC1 (TriTrypDB: LdBPK\_130160.1 and LINF\_350045600) isoform ORFs were  
618 amplified by PCR from their respective gDNA and fused to a 6xHis tag and a TEV cleavage  
619 site. PKACs were N-terminally fused to a strep tag. Mutations were introduced by PCR site  
620 directed mutagenesis via overlap extensions as described previously in Ho et al. (1989).  
621 Primer sequences are available in Supplementary file 2. The fusion ORFs were cloned into 3<sup>rd</sup>  
622 generation pLEXSY<sup>®</sup> vectors: pLEXSY\_I-ble3 for PKARs and pLEXSY\_I-neo3 for PKACs  
623 (Jena Bioscience). Holoenzymes were reconstituted *in vivo* by co-expression in *Leishmania*  
624 *tarentolae* T7-TR according to the Jena Bioscience manual. The holoenzyme complexes were  
625 isolated using a tandem affinity purification protocol: Ni-NTA followed by Streptactin matrix. *L.*  
626 *tarentolae* cells were detergent lysed by vortex homogenization in Ni-NTA binding buffer (50  
627 mM NaH<sub>2</sub>PO<sub>4</sub> pH 7.4, 150 mM NaCl, 20 mM imidazole, 0.5% Triton-X 100, Complete Mini  
628 EDTA-free protease inhibitor cocktail (Roche)). The soluble fraction was loaded onto a gravity  
629 flow Ni-NTA column. After washing with Ni-NTA wash buffer (50 mM NaH<sub>2</sub>PO<sub>4</sub> pH 7.4, 150  
630 mM NaCl, 40 mM imidazole) the protein complex was eluted in Ni-NTA elution buffer (50 mM  
631 NaH<sub>2</sub>PO<sub>4</sub> pH 7.4, 150 mM NaCl, 250 mM imidazole). The eluate was immediately loaded onto  
632 the gravity flow Streptactin column, washed with Streptactin wash buffer (50 mM NaH<sub>2</sub>PO<sub>4</sub> pH  
633 7.4, 150 mM NaCl) and eluted with Streptactin elution buffer (50 mM NaH<sub>2</sub>PO<sub>4</sub> pH 7.4, 150  
634 mM NaCl, 2.5 mM desthiobiotin). All purification steps were carried out at 4°C. The mammalian  
635 PKA holoenzyme: human R1 $\alpha$ /mouse C $\alpha$  was co-expressed and co-purified from *E. coli* strain  
636 APE304 as previously described in (Bachmaier et al. 2019). The kinase assays with  
637 radiolabelled [ $\gamma$ -<sup>32</sup>P] ATP were set up and performed as described in Hastie, McLauchlan, and  
638 Cohen (2006). Briefly, a 50  $\mu$ l kinase reaction mix was prepared at 4 °C by the addition of 5  $\mu$ l  
639 of 10x reaction buffer (500 mM MOPS pH 7; 1 M NaCl; 10 mM EGTA; 10 mM DTT; 1mg/ml

640 BSA; 100 mM MgCl<sub>2</sub>), 5  $\mu$ l kemptide (1mM), 5  $\mu$ l purified PKA holoenzyme. A test run using  
641 known activating ligands (Bachmaier et al. 2019) was carried out and the kinase would then  
642 be diluted in 1x reaction buffer, in order to work within the linear range of the assay. The  
643 Ligands were diluted in 30 $\mu$ l H<sub>2</sub>O prior to addition. After temperature equilibration to 30°C, the  
644 kinase reaction was started by addition of 5  $\mu$ l 1mM ATP spiked with [ $\gamma$  32P] ATP to give 200-  
645 400 cpm/pmole. The reaction was stopped after 10 min by pipetting 40  $\mu$ l onto a 2x2cm p81-  
646 phosphocellulose paper and immediate immersion into 75 mM phosphoric acid.  
647 Measurements were carried out in triplicates. Dose response curve fitting was performed with  
648 Graphpad® prism's non-linear regression for calculation of half activation constants EC<sub>50</sub> and  
649 95% confidence interval.

650

#### 651 **Protein expression and purification for ligand binding studies**

652 N-terminally truncated *T. brucei* PKAR(199-499) and *T. cruzi* PKAR(200-503) were cloned into  
653 pETDuet1 (Novagen) with a N-terminal 6xHis-tag. TbPKAR(199-499) mutants 6 and 7 (for  
654 sequences see Table 2) were generated by site-directed mutagenesis and cloned into  
655 pETDuet1. N-terminally truncated *L. donovani* PKAR(200-502) was fused to a Sumo\_Ubiquitin  
656 Tag in a pET\_Sumo vector (ThermoFisher). Refolded (RfAPO) and native (N) protein samples  
657 were subjected to nano differential scanning fluorimetry (nanoDSF), whereas for isothermal  
658 titration calorimetry (ITC), only refolded protein was used. Native and refolded proteins were  
659 prepared as reported by Bachmaier et al. (2019) with the following modifications: native protein  
660 (N) eluted from affinity chromatography (Ni-NTA column) was dialyzed overnight and then  
661 directly probed for thermal stability using nanoDSF. Purification of LdPKAR1(200-502) by Ni-  
662 NTA affinity chromatography was followed by SenP2 protease mediated cleavage of the N-  
663 terminal Sumo tag during dialysis of the protein in 50mM Hepes pH 7.5 and 50mM NaCl (buffer  
664 B). After denaturation of TbPKAR(199-499) mutants 6 and 7, refolding occurred in a dialysis  
665 bag in presence of 1mM cAMP or 1mM cIMP, respectively. To mutant 7, additionally 6.5 moles



666 of cIMP per mole of refolded protein were added before ITC measurements. Final elution of all  
667 proteins after Size Exclusion Chromatography (SEC) was in either 50mM HEPES pH 7.5, 50  
668 mM NaCl, and 1% DMSO (buffer A) or 50mM HEPES pH 7.5 and 50 mM NaCl (buffer B).  
669 Preparation of cAMP-free human PKAR1 $\alpha$  was performed according to Buechler, Herberg, and  
670 Taylor (1993).

671

### 672 **Isothermal titration calorimetry (ITC)**

673 ITC measurements were carried out on a MicroCal PEAQ-ITC (Malvern) instrument. Refolded  
674 proteins were diluted to 10-20  $\mu$ M in buffer A or B. 100-200  $\mu$ M ligand were diluted in the same  
675 buffer as the protein and DMSO concentration of protein and ligand samples was adjusted as  
676 accurately as possible. As we observed that the molar ratio N decreased with time after final  
677 purification, we did all ITC experiments within a day to avoid precipitation of the protein. 2-4  $\mu$ l  
678 of ligand were injected in a series of 13-19 injections into the protein sample at 298K. The  
679 Differential Power (DP) between reference and sample cell was maintained at 8-10  $\mu$ cal s<sup>-1</sup> in  
680 all experiments. Data analysis was performed with the MicroCal PEAQ-ITC software applying  
681 a model with one binding site.

682

### 683 **Thermal shift analysis using Nano Differentiation Scanning Fluorimetry (nanoDSF)**

684 For nano differential scanning fluorimetry (nanoDSF), a Prometheus NT.48 (Nanotemper  
685 Technologies, Munich) equipped with high sensitivity glass capillaries (PR-C006, Nanotemper)  
686 was used. The technique allows label-free monitoring of protein melting temperatures ( $T_m$ ).  
687 Upon heating 10 $\mu$ l of protein sample per capillary from 15° to 90°, at a rate of 1-2°C per minute,  
688 intrinsic fluorescence at 330 and 350nm ( $F_{330}/F_{350}$ ) was recorded and the ratio of both or only  
689 the fluorescence at 330nm was plotted as function of temperature. The melting temperature  
690 ( $T_m$ ) was calculated from the first derivative of the curve, using the instrument's built-in  
691 software. Native (N) and refolded (RfAPO) protein preparations of TbPKAR(199-499),  
692 TbPKAR(199-499) mutant 6 and 7, and LdPKAR1(200-502) were subjected to nanoDSF

693 before and after incubation in 1mM of ligand(s). Accurate protein refolding was assumed when  
694 the melting temperature ( $T_m$ ) of refolded and native samples, both loaded with an excess of 1  
695 mM ligand, presented close matching values.

696

### 697 **Circular dichroism spectroscopy**

698 For circular dichroism (CD) spectroscopy, native and refolded TbPKAR(199-499) samples  
699 from mutant 6 were prepared as described above with the following modifications: Refolding  
700 occurred in presence of 1mM inosine and 1mM cAMP, followed by a SEC on a Superdex 200  
701 Increase 10/20 GL column (GE Healthcare) and elution in CD buffer (20mM NaPi), free of  
702 chlorine. To ensure complete buffer change, the refolded protein was subsequently passed  
703 over a PD10 column (Ge Healthcare) and again eluted in CD buffer. Similarly, native protein  
704 was passed twice over PD10 columns with elution in CD buffer. Proteins were diluted to  $2\mu\text{M}$   
705 ( $0.1\text{mAU}$  absorbance) and incubated with  $10\mu\text{M}$  inosine and  $10\mu\text{M}$  cAMP before  
706 measurement. The CD spectra were recorded using a Jasco J-815-150S spectropolarimeter  
707 (Jasco®, Tokyo, Japan) connected to a PTC 343 peltier set up to maintain the system at a  
708 constant temperature of  $20^\circ\text{C}$ . The protein (sample volume=in  $200\mu\text{L}$ ) was inserted into a  
709 rectangular quartz cell of 0.1 cm path length and the UV spectra recorded by averaging 20  
710 scans in the wavelength of 185-260 nm. The CD signal was recorded in a window of -7 to 10  
711 mdeg. The identification of the peaks in the spectra related to  $\alpha$ -helices (193 nm) and  $\beta$ -sheet  
712 (208 and 222 nm) enrichment were performed according to Greenfield and Fasman (1969).

713

### 714 **Crystallization, X-ray diffraction data collection and structure determination of ligand** 715 **bound PKARs**

716 Protein purification for crystallization of TbPKAR(199-499), TbPKAR(199-499) mutant 6 and  
717 TcPKAR(200-503) was performed as described in Bachmaier et al. (2019) with the following  
718 modifications: Native protein eluted from a Ni-NTA column was cleaved by TEV protease for  
719 removal of the N-terminal 6xHis tag and then subjected to SEC. Protein freshly eluted from the

720 Superdex 200 10/300 GL column was concentrated to at least 10 mg ml<sup>-1</sup> and, in order to  
721 ensure homogeneous ligand binding, incubated with either 1mM inosine (TbPKAR(199-499)  
722 and TcPKAR(200-503)) or 1mM cAMP (TbPKAR(199-499) mutant 6). Crystals grew within 7-  
723 10 days using sitting drops (100-500 nL) crystalizing via the vapor diffusion method (Davies  
724 and Segal 1971). Crystals of TbPKAR(199-499) were obtained in 50 mM Tris pH 8.0, 4% MPD,  
725 0.2 M ammonium sulfate, 32% PEG 3350 at 4°C. Crystals of TcPKAR(200-503) were obtained  
726 in 20% PEG 3350, 0.2M Magnesium acetate at 4°C. Crystals of TbPKAR(199-499) mutant 6  
727 were obtained in 50 mM Tris pH 8.0, 0.2 mM Magnesium Chloride, 30% PEG 3350 at 4°C.  
728 Prior to flash cooling in liquid nitrogen, the crystals were briefly soaked in a mother liquor  
729 solution made of the reservoir buffer and 40% (v/v) of ethylene glycol. The X-ray diffraction  
730 data were collected at the Swiss Light Source beamline PXIII and on a Bruker D8 venture  
731 Metaljet system, at 100K. The collected data were processed using XDS and scaled using  
732 XSCALE (Kabsch 2010; Kabsch 2012). The structure of TbPKAR(199-499) with inosine was  
733 solved using the Sulphur SAD (Single-wavelength Anomalous Diffraction) phasing method  
734 (Doutch et al. 2012). All other structures were solved by Molecular Replacement (MR) (McCoy  
735 2007) using the structure of TbPKAR + inosine as a search model in the software Phaser as  
736 implemented in PHENIX (Liebschner et al. 2019; Adams et al. 2010). All the MR solutions  
737 presented a TFZ score (Translation Function Z-score) > 8 indicating correct solutions. The  
738 molecular models of the proteins were built using the 2Fo-Fc electron density map while the  
739 ligands were built using the difference map. The final structure was achieved by iterative cycles  
740 of manual building in Coot (Emsley et al. 2010) and refinement using PHENIX. Data collection  
741 and refinement statistics are summarized in Supplementary Table 1.

742

### 743 **In silico docking of nucleosides to TbPKAR**

744 In silico docking was performed using the software Glide (Friesner et al. 2004) as implemented  
745 in Maestro (Schrödinger®). Ligands were built manually and prepared using LigPrep  
746 (Schrödinger®). Ionization states and tautomers were not considered during ligand  
747 preparation. Stereoisomers had their chirality determined from the 3D structure (max. 32 per

748 ligand). The docking mode chosen was SP (Standard Precision). Chain B of TbPKAR (PDB:  
749 6FLO) was chosen as a template for docking, since it presented a better overall electron  
750 density. For docking of inosine and guanosine to the A-site of TbPKAR the grid constrains  
751 used were E311 and water 96 (Match at least = 2). For docking of adenosine, the K293  
752 conformer was changed to reach a hydrogen bond with the N7 of the purine ring. The grid  
753 restrains used were E311, K293 (Match at least = 2). For docking to the B-site the chosen grid  
754 constraints were A444(N), G432(N), E435 and water 273 (Match at least = 2) for all three  
755 nucleosides. Poses were analysed by visual inspection and ranked according to Glide G-score  
756 (GG), a mathematical prediction of Gibbs Free Energy.

757

#### 758 **Mass spectrometry analysis of ligands bound to TbPKAR *in vivo***

759 The TbPKAR ORF was N-terminally fused to a 6xHis tag by PCR and cloned into the pLEW82  
760 expression vector and transfected into MITat1.2SM (single marker) blood stream form (BSF)  
761 cells and EATRO11252T7 insect stage form (PCF) cells, both of which expressed T7  
762 polymerase and tetracycline repressor. Cell culture was exactly as reported before for BSF  
763 (Bachmaier et al. 2019) and PCF (Schenk et al. 2021). Transfected MiTat1.2SM blood stream  
764 forms were kept under constant selection with 1  $\mu\text{g/ml}$  G418 and 2.5  $\mu\text{g/ml}$  Bleomycin.  
765 Transfected EATRO11252T7 PCF cells were cultured under constant selection with 10  $\mu\text{g/ml}$   
766 G418, 25  $\mu\text{g/ml}$  hygromycin and 2.5  $\mu\text{g/ml}$  bleomycin. Selected clones were induced with 1  
767  $\mu\text{g/ml}$  tetracycline for 24 hours. The cells were harvested by centrifugation (1400 g for 10 min),  
768 washed once with PBS and then detergent lysed in Ni-NTA binding buffer. The soluble fraction  
769 was incubated with magnetic Ni-NTA beads for 1 hour, followed by quick single washes in Ni-  
770 NTA binding buffer, Ni-NTA wash buffer, Streptactin wash buffer (50 mM  $\text{NaH}_2\text{PO}_4$  pH 7.4, 150  
771 mM NaCl) and finally MS-Grade  $\text{H}_2\text{O}$ . The beads were suspended in MS-grade water and  
772 boiled at 95°C for 5 minutes. Beads and denatured protein precipitate were removed by  
773 centrifugation at 10,000g for 10 min. The supernatant was then transferred to a fresh tube and  
774 stored at -20°C until analysis. For LC-ESI-MS, the samples were chromatographed by a

775 Dionex Ultimate 3000 HPLC system with a flow of 0.15 ml/min over an Interchim Uptisphere  
776 120Å 3HDO C18 column (150 x 2 mm), while maintaining the column temperature at 30 °C.  
777 Elution was performed with buffer A (2 mM HCOONH<sub>4</sub> in H<sub>2</sub>O, pH 5.5) and buffer B (2 mM  
778 HCOONH<sub>4</sub> in H<sub>2</sub>O/MeCN 20/80, pH 5.5), with a linear gradient from 0% to 15% buffer B in 45  
779 min. The elution was monitored at 260 nm (Dionex Ultimate 3000 Diode Array Detector). The  
780 chromatographic eluent was directly injected into the ion source of a Thermo Finnigan LTQ  
781 Orbitrap XL without prior splitting. Ions were scanned by use of a positive polarity mode over  
782 a full-scan range of m/z 80-500 with a resolution of 30000. Parameters of the mass  
783 spectrometer were tuned with a freshly mixed aqueous solution of inosine (5 μM). The  
784 synthetic <sup>13</sup>C<sub>5</sub>-labeled internal isotope standards with an isotope enrichment of >99% were  
785 procured from Omicron Biochemicals Inc. The quantification of nucleosides was carried out,  
786 as described in Traube et al. (2019), with the following amounts of the corresponding isotope  
787 labelled internal standards: 256.8 fmol [<sup>13</sup>C<sub>5</sub>]-inosine, 152.8 fmol [<sup>13</sup>C<sub>5</sub>]-guanosine, 662.8 fmol  
788 [<sup>13</sup>C<sub>5</sub>]-adenosine.

789 **References**

- 790 Adams, Paul D, Pavel V Afonine, Gábor Bunkóczi, Vincent B Chen, Ian W Davis, Nathaniel  
791 Echols, Jeffrey J Headd, L-W Hung, Gary J Kapral, and Ralf W Grosse-Kunstleve.  
792 2010. "PHENIX: a comprehensive Python-based system for macromolecular structure  
793 solution." *Acta Crystallographica Section D: Biological Crystallography* 66 (2):213-  
794 221.
- 795 Akimoto, M., E. T. McNicholl, A. Ramkisson, K. Moleschi, S. S. Taylor, and G. Melacini.  
796 2015. "Mapping the Free Energy Landscape of PKA Inhibition and Activation: A  
797 Double-Conformational Selection Model for the Tandem cAMP-Binding Domains of  
798 PKA RIalpha." *PLoS Biol* 13 (11):e1002305. doi: 10.1371/journal.pbio.1002305.
- 799 Bachmaier, S., G. Giacomelli, E. Calvo-Alvarez, L. R. Vieira, J. Van Den Abbeele, A.  
800 Aristodemou, E. Lorentzen, M. K. Gould, A. Brennand, J. W. Dupuy, I. Forne, A.  
801 Imhof, M. Bramkamp, D. Salmon, B. Rotureau, and M. Boshart. 2022. "A multi-  
802 adenylate cyclase regulator at the flagellar tip controls African trypanosome  
803 transmission." *Nat Commun* 13 (1):5445. doi: 10.1038/s41467-022-33108-z.
- 804 Bachmaier, S., M. K. Gould, E. Polatoglou, R. Omelianczyk, A. E. Brennand, M. A. Aloraini,  
805 J. C. Munday, D. Horn, M. Boshart, and H. P. de Koning. 2023. "Novel kinetoplastid-  
806 specific cAMP binding proteins identified by RNAi screening for cAMP resistance in  
807 *Trypanosoma brucei*." *Front Cell Infect Microbiol* 13:1204707. doi:  
808 10.3389/fcimb.2023.1204707.
- 809 Bachmaier, S., Y. Volpato Santos, S. Kramer, G. B. Githure, T. Klockner, J. Pepperl, C. Baums,  
810 R. Schenk, F. Schwede, H. G. Genieser, J. W. Dupuy, I. Forne, A. Imhof, J. Basquin,  
811 E. Lorentzen, and M. Boshart. 2019. "Nucleoside analogue activators of cyclic AMP-  
812 independent protein kinase A of *Trypanosoma*." *Nat Commun* 10 (1):1421. doi:  
813 10.1038/s41467-019-09338-z.
- 814 Bachmaier, S., R. Witztum, P. Tsigankov, R. Koren, M. Boshart, and D. Zilberstein. 2016.  
815 "Protein kinase A signaling during bidirectional axenic differentiation in *Leishmania*."  
816 *Int J Parasitol* 46 (2):75-82. doi: 10.1016/j.ijpara.2015.09.003.
- 817 Bachmaier, Sabine, and Michael Boshart. 2013. "Kinetoplastid AGC Kinases." In *Protein*  
818 *Phosphorylation in Parasites*, 99-122.
- 819 Baker, N., C. M. C. Catta-Preta, R. Neish, J. Sadlova, B. Powell, E. V. C. Alves-Ferreira, V.  
820 Geoghegan, J. B. T. Carnielli, K. Newling, C. Hughes, B. Vojtkova, J. Anand, A. Mihut,  
821 P. B. Walrad, L. G. Wilson, J. W. Pitchford, P. Volf, and J. C. Mottram. 2021.  
822 "Systematic functional analysis of *Leishmania* protein kinases identifies regulators of  
823 differentiation or survival." *Nat Commun* 12 (1):1244. doi: 10.1038/s41467-021-  
824 21360-8.
- 825 Baker, S. A., and J. Rutter. 2023. "Metabolites as signalling molecules." *Nat Rev Mol Cell Biol*  
826 24 (5):355-374. doi: 10.1038/s41580-022-00572-w.
- 827 Banerjee, C., and D. Sarkar. 2001. "The cAMP-binding proteins of *Leishmania* are not the  
828 regulatory subunits of cAMP-dependent protein kinase." *Comp Biochem Physiol B*  
829 *Biochem Mol Biol* 130 (2):217-26. doi: 10.1016/s1096-4959(01)00232-9.
- 830 Bennett, B. D., E. H. Kimball, M. Gao, R. Osterhout, S. J. Van Dien, and J. D. Rabinowitz.  
831 2009. "Absolute metabolite concentrations and implied enzyme active site occupancy  
832 in *Escherichia coli*." *Nat Chem Biol* 5 (8):593-9. doi: 10.1038/nchembio.186.
- 833 Berman, H. M., L. F. Ten Eyck, D. S. Goodsell, N. M. Haste, A. Kornev, and S. S. Taylor.  
834 2005. "The cAMP binding domain: an ancient signaling module." *Proc Natl Acad Sci*  
835 *USA* 102 (1):45-50. doi: 10.1073/pnas.0408579102.
- 836 Bhattacharya, A., A. Biswas, and P. K. Das. 2012. "Identification of a protein kinase A  
837 regulatory subunit from *Leishmania* having importance in metacyclogenesis through



- 838 induction of autophagy." *Mol Microbiol* 83 (3):548-64. doi: 10.1111/j.1365-  
839 2958.2011.07950.x.
- 840 Billington, K., C. Halliday, R. Madden, P. Dyer, A. R. Barker, F. F. Moreira-Leite, M.  
841 Carrington, S. Vaughan, C. Hertz-Fowler, S. Dean, J. D. Sunter, R. J. Wheeler, and K.  
842 Gull. 2023. "Genome-wide subcellular protein map for the flagellate parasite  
843 *Trypanosoma brucei*." *Nat Microbiol* 8 (3):533-547. doi: 10.1038/s41564-022-01295-  
844 6.
- 845 Boccaletto, P., M. A. Machnicka, E. Purta, P. Piatkowski, B. Baginski, T. K. Wirecki, V. de  
846 Crecy-Lagard, R. Ross, P. A. Limbach, A. Kotter, M. Helm, and J. M. Bujnicki. 2018.  
847 "MODOMICS: a database of RNA modification pathways. 2017 update." *Nucleic*  
848 *Acids Res* 46 (D1):D303-D307. doi: 10.1093/nar/gkx1030.
- 849 Boccaletto, P., F. Stefaniak, A. Ray, A. Cappannini, S. Mukherjee, E. Purta, M. Kurkowska, N.  
850 Shirvanizadeh, E. Destefanis, P. Groza, G. Avsar, A. Romitelli, P. Pir, E. Dassi, S. G.  
851 Conticello, F. Aguilo, and J. M. Bujnicki. 2022. "MODOMICS: a database of RNA  
852 modification pathways. 2021 update." *Nucleic Acids Res* 50 (D1):D231-D235. doi:  
853 10.1093/nar/gkab1083.
- 854 Bubis, J., J. C. Martinez, M. Calabokis, J. Ferreira, C. E. Sanz-Rodriguez, V. Navas, J. L.  
855 Escalona, Y. Guo, and S. S. Taylor. 2018. "The gene product of a *Trypanosoma*  
856 *equiperdum* ortholog of the cAMP-dependent protein kinase regulatory subunit is a  
857 monomeric protein that is not capable of binding cyclic nucleotides." *Biochimie*  
858 146:166-180. doi: 10.1016/j.biochi.2017.12.010.
- 859 Buechler, Y. J., F. W. Herberg, and S. S. Taylor. 1993. "Regulation-defective mutants of type  
860 I cAMP-dependent protein kinase. Consequences of replacing arginine 94 and arginine  
861 95." *J Biol Chem* 268 (22):16495-503.
- 862 Buxton, I. L., and L. L. Brunton. 1983. "Compartments of cyclic AMP and protein kinase in  
863 mammalian cardiomyocytes." *J Biol Chem* 258 (17):10233-9.
- 864 Byun, J. A., M. Akimoto, B. VanSchouwen, T. S. Lazarou, S. S. Taylor, and G. Melacini. 2020.  
865 "Allosteric pluripotency as revealed by protein kinase A." *Sci Adv* 6 (25):eabb1250.  
866 doi: 10.1126/sciadv.abb1250.
- 867 Byun, J. A., K. Van, J. Huang, P. Henning, E. Franz, M. Akimoto, F. W. Herberg, C. Kim, and  
868 G. Melacini. 2020. "Mechanism of allosteric inhibition in the *Plasmodium falciparum*  
869 cGMP-dependent protein kinase." *J Biol Chem* 295 (25):8480-8491. doi:  
870 10.1074/jbc.RA120.013070.
- 871 Byun, J. A., B. VanSchouwen, M. Akimoto, and G. Melacini. 2020. "Allosteric inhibition  
872 explained through conformational ensembles sampling distinct "mixed" states."  
873 *Comput Struct Biotechnol J* 18:3803-3818. doi: 10.1016/j.csbj.2020.10.026.
- 874 Canaves, J. M., and S. S. Taylor. 2002. "Classification and phylogenetic analysis of the cAMP-  
875 dependent protein kinase regulatory subunit family." *J Mol Evol* 54 (1):17-29. doi:  
876 10.1007/s00239-001-0013-1.
- 877 Cayla, M., Y. R. Nievas, K. R. Matthews, and J. C. Mottram. 2022. "Distinguishing functions  
878 of trypanosomatid protein kinases." *Trends Parasitol* 38 (11):950-961. doi:  
879 10.1016/j.pt.2022.08.009.
- 880 Cho-Chung, Y. S., T. Clair, P. Tagliaferri, S. Ally, D. Katsaros, G. Tortora, L. Neckers, T. L.  
881 Avery, G. W. Crabtree, and R. K. Robins. 1989. "Site-selective cyclic AMP analogs as  
882 new biological tools in growth control, differentiation, and proto-oncogene regulation."  
883 *Cancer Invest* 7 (2):161-77. doi: 10.3109/07357908909038282.
- 884 Choi, J., W. H. Jung, and J. W. Kronstad. 2015. "The cAMP/protein kinase A signaling pathway  
885 in pathogenic basidiomycete fungi: Connections with iron homeostasis." *J Microbiol*  
886 53 (9):579-87. doi: 10.1007/s12275-015-5247-5.

- 887 Corbin, J. D., D. OGREID, J. P. MILLER, R. H. SUVA, B. JASTORFF, and S. O. DOSKELAND. 1986.  
888 "Studies of cGMP analog specificity and function of the two intrasubunit binding sites  
889 of cGMP-dependent protein kinase." *J Biol Chem* 261 (3):1208-14.
- 890 Davenport, A. P., S. P. ALEXANDER, J. L. SHARMAN, A. J. PAWSON, H. E. BENSON, A. E. MONAGHAN,  
891 W. C. LIEW, C. P. MPAMHANGA, T. I. BONNER, R. R. NEUBIG, J. P. PIN, M. SPEDDING, and  
892 A. J. HARMAR. 2013. "International Union of Basic and Clinical Pharmacology.  
893 LXXXVIII. G protein-coupled receptor list: recommendations for new pairings with  
894 cognate ligands." *Pharmacol Rev* 65 (3):967-86. doi: 10.1124/pr.112.007179.
- 895 DAVIES, DAVID R, and DM SEGAL. 1971. "[25] Protein crystallization: Micro techniques  
896 involving vapor diffusion." In *Methods in enzymology*, 266-269. Elsevier.
- 897 DILLER, T. C., MADHUSUDAN, N. H. XUONG, and S. S. TAYLOR. 2001. "Molecular basis for  
898 regulatory subunit diversity in cAMP-dependent protein kinase: crystal structure of the  
899 type II beta regulatory subunit." *Structure* 9 (1):73-82. doi: 10.1016/s0969-  
900 2126(00)00556-6.
- 901 DOSTMANN, W. R., and S. S. TAYLOR. 1991. "Identifying the molecular switches that determine  
902 whether (Rp)-cAMPS functions as an antagonist or an agonist in the activation of  
903 cAMP-dependent protein kinase I." *Biochemistry* 30 (35):8710-6. doi:  
904 10.1021/bi00099a032.
- 905 DOSTMANN, W. R., S. S. TAYLOR, H. G. GENIESER, B. JASTORFF, S. O. DOSKELAND, and D. OGREID.  
906 1990. "Probing the cyclic nucleotide binding sites of cAMP-dependent protein kinases  
907 I and II with analogs of adenosine 3',5'-cyclic phosphorothioates." *J Biol Chem* 265  
908 (18):10484-91.
- 909 DOUTCH, J., M. A. HOUGH, S. S. HASNAIN, and R. W. STRANGE. 2012. "Challenges of sulfur SAD  
910 phasing as a routine method in macromolecular crystallography." *J Synchrotron Radiat*  
911 19 (Pt 1):19-29. doi: 10.1107/S0909049511049004.
- 912 DUNIN-HORKAWICZ, S., A. CZERWONIEC, M. J. GAJDA, M. FEDER, H. GROSJEAN, and J. M. BUJNICKI.  
913 2006. "MODOMICS: a database of RNA modification pathways." *Nucleic Acids Res*  
914 34 (Database issue):D145-9. doi: 10.1093/nar/gkj084.
- 915 EMSLEY, P., B. LOHKAMP, W. G. SCOTT, and K. COWTAN. 2010. "Features and development of  
916 Coot." *Acta Crystallogr D Biol Crystallogr* 66 (Pt 4):486-501. doi:  
917 10.1107/S0907444910007493.
- 918 FRIESNER, R. A., J. L. BANKS, R. B. MURPHY, T. A. HALGREN, J. J. KLICIC, D. T. MAINZ, M. P.  
919 REPASKY, E. H. KNOLL, M. SHELLEY, J. K. PERRY, D. E. SHAW, P. FRANCIS, and P. S. SHENKIN.  
920 2004. "Glide: a new approach for rapid, accurate docking and scoring. 1. Method and  
921 assessment of docking accuracy." *J Med Chem* 47 (7):1739-49. doi:  
922 10.1021/jm0306430.
- 923 GAUSDAL, G., A. WERGELAND, J. SKAVLAND, E. NGUYEN, F. PENDINO, N. ROUHEE, E. MCCORMACK,  
924 L. HERFINDAL, R. KLEPPE, U. HAVEMANN, F. SCHWEDÉ, O. BRUSERUD, B. T. GJERTSEN, M.  
925 LANOTTE, E. SEGAL-BENDIRDJIAN, and S. O. DOSKELAND. 2013. "Cyclic AMP can promote  
926 APL progression and protect myeloid leukemia cells against anthracycline-induced  
927 apoptosis." *Cell Death Dis* 4 (2):e516. doi: 10.1038/cddis.2013.39.
- 928 GREENFIELD, N., and G. D. FASMAN. 1969. "Computed circular dichroism spectra for the  
929 evaluation of protein conformation." *Biochemistry* 8 (10):4108-16. doi:  
930 10.1021/bi00838a031.
- 931 HASTE, N. M., H. TALABANI, A. DOO, A. MERCKX, G. LANGSLEY, and S. S. TAYLOR. 2012. "Exploring  
932 the Plasmodium falciparum cyclic-adenosine monophosphate (cAMP)-dependent  
933 protein kinase (PfPKA) as a therapeutic target." *Microbes Infect* 14 (10):838-50. doi:  
934 10.1016/j.micinf.2012.05.004.
- 935 HASTIE, C. J., H. J. McLAUCHLAN, and P. COHEN. 2006. "Assay of protein kinases using  
936 radiolabeled ATP: a protocol." *Nat Protoc* 1 (2):968-71. doi: 10.1038/nprot.2006.149.



- 937 Haushalter, K. J., D. E. Casteel, A. Raffener, E. Stefan, H. H. Patel, and S. S. Taylor. 2018.  
938 "Phosphorylation of protein kinase A (PKA) regulatory subunit RIalpha by protein  
939 kinase G (PKG) primes PKA for catalytic activity in cells." *J Biol Chem* 293 (12):4411-  
940 4421. doi: 10.1074/jbc.M117.809988.
- 941 Herberg, F. W., S. S. Taylor, and W. R. Dostmann. 1996. "Active site mutations define the  
942 pathway for the cooperative activation of cAMP-dependent protein kinase."  
943 *Biochemistry* 35 (9):2934-42. doi: 10.1021/bi951647c.
- 944 Hitz, E., N. Wiedemar, A. Passecker, B. A. S. Graca, C. Scheurer, S. Wittlin, N. M. B.  
945 Brancucci, I. Vakonakis, P. Maser, and T. S. Voss. 2021. "The 3-phosphoinositide-  
946 dependent protein kinase 1 is an essential upstream activator of protein kinase A in  
947 malaria parasites." *PLoS Biol* 19 (12):e3001483. doi: 10.1371/journal.pbio.3001483.
- 948 Ho, S. N., H. D. Hunt, R. M. Horton, J. K. Pullen, and L. R. Pease. 1989. "Site-directed  
949 mutagenesis by overlap extension using the polymerase chain reaction." *Gene* 77  
950 (1):51-9. doi: 10.1016/0378-1119(89)90358-2.
- 951 Huang, G. Y., O. O. Gerlits, M. P. Blakeley, B. Sankaran, A. Y. Kovalevsky, and C. Kim. 2014.  
952 "Neutron diffraction reveals hydrogen bonds critical for cGMP-selective activation:  
953 insights for cGMP-dependent protein kinase agonist design." *Biochemistry* 53  
954 (43):6725-7. doi: 10.1021/bi501012v.
- 955 Huang, G. Y., J. J. Kim, A. S. Reger, R. Lorenz, E. W. Moon, C. Zhao, D. E. Casteel, D.  
956 Bertinetti, B. Vanschouwen, R. Selvaratnam, J. W. Pflugrath, B. Sankaran, G. Melacini,  
957 F. W. Herberg, and C. Kim. 2014. "Structural basis for cyclic-nucleotide selectivity and  
958 cGMP-selective activation of PKG I." *Structure* 22 (1):116-24. doi:  
959 10.1016/j.str.2013.09.021.
- 960 Huang, H., L. M. Weiss, F. Nagajyothi, H. B. Tanowitz, M. Wittner, G. A. Orr, and Y. Bao.  
961 2006. "Molecular cloning and characterization of the protein kinase A regulatory  
962 subunit of *Trypanosoma cruzi*." *Mol Biochem Parasitol* 149 (2):242-5. doi:  
963 10.1016/j.molbiopara.2006.05.008.
- 964 Huseby, S., G. Gausdal, T. J. Keen, E. Kjaerland, C. Krakstad, L. Myhren, K. Bronstad, C.  
965 Kunick, F. Schwede, H. G. Genieser, R. Kleppe, and S. O. Doskeland. 2011. "Cyclic  
966 AMP induces IPC leukemia cell apoptosis via CRE-and CDK-dependent Bim  
967 transcription." *Cell Death Dis* 2 (12):e237. doi: 10.1038/cddis.2011.124.
- 968 Jia, Y., J. B. Marq, H. Bisio, D. Jacot, C. Mueller, L. Yu, J. Choudhary, M. Brochet, and D.  
969 Soldati-Favre. 2017. "Crosstalk between PKA and PKG controls pH-dependent host  
970 cell egress of *Toxoplasma gondii*." *EMBO J* 36 (21):3250-3267. doi:  
971 10.15252/embj.201796794.
- 972 Kabsch, W. 2012. "XSCALE."
- 973 Kabsch, Wolfgang. 2010. "XDS." *Acta Crystallographica Section D* 66 (2):125-132. doi:  
974 doi:10.1107/S0907444909047337.
- 975 Kannan, N., J. Wu, G. S. Anand, S. Yooseph, A. F. Neuwald, J. C. Venter, and S. S. Taylor.  
976 2007. "Evolution of allostery in the cyclic nucleotide binding module." *Genome Biol* 8  
977 (12):R264. doi: 10.1186/gb-2007-8-12-r264.
- 978 Khamina, M., K. Martinez Pomier, M. Akimoto, B. VanSchouwen, and G. Melacini. 2022.  
979 "Non-Canonical Allostery in Cyclic Nucleotide Dependent Kinases." *J Mol Biol* 434  
980 (17):167584. doi: 10.1016/j.jmb.2022.167584.
- 981 Kim, C., C. Y. Cheng, S. A. Saldanha, and S. S. Taylor. 2007. "PKA-I holoenzyme structure  
982 reveals a mechanism for cAMP-dependent activation." *Cell* 130 (6):1032-43. doi:  
983 10.1016/j.cell.2007.07.018.
- 984 Kim, C., and R. Sharma. 2021. "Cyclic nucleotide selectivity of protein kinase G isozymes."  
985 *Protein Sci* 30 (2):316-327. doi: 10.1002/pro.4008.

- 986 Kim, C., N. H. Xuong, and S. S. Taylor. 2005. "Crystal structure of a complex between the  
987 catalytic and regulatory (RI $\alpha$ ) subunits of PKA." *Science* 307 (5710):690-6. doi:  
988 10.1126/science.1104607.
- 989 Kim, D. H., F. Achcar, R. Breitling, K. E. Burgess, and M. P. Barrett. 2015. "LC-MS-based  
990 absolute metabolite quantification: application to metabolic flux measurement in  
991 trypanosomes." *Metabolomics* 11 (6):1721-1732. doi: 10.1007/s11306-015-0827-2.
- 992 Kim, J. S., K. T. Lee, M. H. Lee, E. Cheong, and Y. S. Bahn. 2021. "Adenylyl Cyclase and  
993 Protein Kinase A Play Redundant and Distinct Roles in Growth, Differentiation,  
994 Antifungal Drug Resistance, and Pathogenicity of *Candida auris*." *mBio* 12  
995 (5):e0272921. doi: 10.1128/mBio.02729-21.
- 996 Kurokawa, H., K. Kato, T. Iwanaga, T. Sugi, A. Sudo, K. Kobayashi, H. Gong, H. Takemae,  
997 F. C. Recueno, T. Horimoto, and H. Akashi. 2011. "Identification of *Toxoplasma*  
998 *gondii* cAMP dependent protein kinase and its role in the tachyzoite growth." *PLoS*  
999 *One* 6 (7):e22492. doi: 10.1371/journal.pone.0022492.
- 1000 Lee, S. J., B. Lodder, Y. Chen, T. Patriarchi, L. Tian, and B. L. Sabatini. 2021. "Cell-type-  
1001 specific asynchronous modulation of PKA by dopamine in learning." *Nature* 590  
1002 (7846):451-456. doi: 10.1038/s41586-020-03050-5.
- 1003 Liebschner, D., P. V. Afonine, M. L. Baker, G. Bunkoczi, V. B. Chen, T. I. Croll, B. Hintze, L.  
1004 W. Hung, S. Jain, A. J. McCoy, N. W. Moriarty, R. D. Oeffner, B. K. Poon, M. G.  
1005 Prisant, R. J. Read, J. S. Richardson, D. C. Richardson, M. D. Sammito, O. V. Sobolev,  
1006 D. H. Stockwell, T. C. Terwilliger, A. G. Urzhumtsev, L. L. Videau, C. J. Williams, and  
1007 P. D. Adams. 2019. "Macromolecular structure determination using X-rays, neutrons  
1008 and electrons: recent developments in Phenix." *Acta Crystallogr D Struct Biol* 75 (Pt  
1009 10):861-877. doi: 10.1107/S2059798319011471.
- 1010 Littler, D. R., H. E. Bullen, K. L. Harvey, T. Beddoe, B. S. Crabb, J. Rossjohn, and P. R. Gilson.  
1011 2016. "Disrupting the Allosteric Interaction between the *Plasmodium falciparum*  
1012 cAMP-dependent Kinase and Its Regulatory Subunit." *J Biol Chem* 291 (49):25375-  
1013 25386. doi: 10.1074/jbc.M116.750174.
- 1014 Lorenz, R., D. Bertinetti, and F. W. Herberg. 2017. "cAMP-Dependent Protein Kinase and  
1015 cGMP-Dependent Protein Kinase as Cyclic Nucleotide Effectors." *Handb Exp*  
1016 *Pharmacol* 238:105-122. doi: 10.1007/164\_2015\_36.
- 1017 Lorenz, R., E. W. Moon, J. J. Kim, S. H. Schmidt, B. Sankaran, I. V. Pavlidis, C. Kim, and F.  
1018 W. Herberg. 2017. "Mutations of PKA cyclic nucleotide-binding domains reveal novel  
1019 aspects of cyclic nucleotide selectivity." *Biochem J* 474 (14):2389-2403. doi:  
1020 10.1042/BCJ20160969.
- 1021 Malmstrom, R. D., A. P. Kornev, S. S. Taylor, and R. E. Amaro. 2015. "Allostery through the  
1022 computational microscope: cAMP activation of a canonical signalling domain." *Nat*  
1023 *Commun* 6:7588. doi: 10.1038/ncomms8588.
- 1024 Matthews, K. R. 2015. "25 years of African trypanosome research: From description to  
1025 molecular dissection and new drug discovery." *Mol Biochem Parasitol* 200 (1-2):30-  
1026 40. doi: 10.1016/j.molbiopara.2015.01.006.
- 1027 Matthews, K. R. 2021. "Trypanosome Signaling-Quorum Sensing." *Annu Rev Microbiol*  
1028 75:495-514. doi: 10.1146/annurev-micro-020321-115246.
- 1029 McCoy, Airlie J. 2007. "Solving structures of protein complexes by molecular replacement  
1030 with Phaser." *Acta Crystallographica Section D: Biological Crystallography* 63 (1):32-  
1031 41.
- 1032 Mohanty, S., E. J. Kennedy, F. W. Herberg, R. Hui, S. S. Taylor, G. Langsley, and N. Kannan.  
1033 2015. "Structural and evolutionary divergence of cyclic nucleotide binding domains in  
1034 eukaryotic pathogens: Implications for drug design." *Biochim Biophys Acta* 1854 (10  
1035 Pt B):1575-85. doi: 10.1016/j.bbapap.2015.03.012.

- 1036 Moll, D., S. Schweinsberg, C. Hammann, and F. W. Herberg. 2007. "Comparative  
1037 thermodynamic analysis of cyclic nucleotide binding to protein kinase A." *Biol Chem*  
1038 388 (2):163-72. doi: 10.1515/BC.2007.018.
- 1039 Mony, B. M., P. MacGregor, A. Ivens, F. Rojas, A. Cowton, J. Young, D. Horn, and K.  
1040 Matthews. 2014. "Genome-wide dissection of the quorum sensing signalling pathway  
1041 in *Trypanosoma brucei*." *Nature* 505 (7485):681-685. doi: 10.1038/nature12864.
- 1042 Musheshe, N., M. Schmidt, and M. Zaccolo. 2018. "cAMP: From Long-Range Second  
1043 Messenger to Nanodomain Signalling." *Trends Pharmacol Sci* 39 (2):209-222. doi:  
1044 10.1016/j.tips.2017.11.006.
- 1045 Niesen, Frank H., Helena Berglund, and Masoud Vedadi. 2007. "The use of differential  
1046 scanning fluorimetry to detect ligand interactions that promote protein stability."  
1047 *Nature Protocols* 2 (9):2212-2221. doi: 10.1038/nprot.2007.321.
- 1048 Oberholzer, M., G. Langousis, H. T. Nguyen, E. A. Saada, M. M. Shimogawa, Z. O. Jonsson,  
1049 S. M. Nguyen, J. A. Wohlschlegel, and K. L. Hill. 2011. "Independent analysis of the  
1050 flagellum surface and matrix proteomes provides insight into flagellum signaling in  
1051 mammalian-infectious *Trypanosoma brucei*." *Mol Cell Proteomics* 10 (10):M111  
1052 010538. doi: 10.1074/mcp.M111.010538.
- 1053 Oberholzer, M., M. A. Lopez, B. T. McLelland, and K. L. Hill. 2010. "Social motility in african  
1054 trypanosomes." *PLoS Pathog* 6 (1):e1000739. doi: 10.1371/journal.ppat.1000739.
- 1055 Ogreid, D., R. Ekanger, R. H. Suva, J. P. Miller, and S. O. Doskeland. 1989. "Comparison of  
1056 the two classes of binding sites (A and B) of type I and type II cyclic-AMP-dependent  
1057 protein kinases by using cyclic nucleotide analogs." *Eur J Biochem* 181 (1):19-31. doi:  
1058 10.1111/j.1432-1033.1989.tb14689.x.
- 1059 Ooi, C. P., and P. Bastin. 2013. "More than meets the eye: understanding *Trypanosoma brucei*  
1060 morphology in the tsetse." *Front Cell Infect Microbiol* 3:71. doi:  
1061 10.3389/fcimb.2013.00071.
- 1062 Paolucci, E., and M. Zaccolo. 2023. "Compartmentalised cAMP signalling in the primary  
1063 cilium." *Front Physiol* 14:1187134. doi: 10.3389/fphys.2023.1187134.
- 1064 Passner, J. M., and T. A. Steitz. 1997. "The structure of a CAP-DNA complex having two  
1065 cAMP molecules bound to each monomer." *Proc Natl Acad Sci U S A* 94 (7):2843-7.  
1066 doi: 10.1073/pnas.94.7.2843.
- 1067 Perrin, A. J., A. Patel, C. Flueck, M. J. Blackman, and D. A. Baker. 2020. "cAMP signalling  
1068 and its role in host cell invasion by malaria parasites." *Curr Opin Microbiol* 58:69-74.  
1069 doi: 10.1016/j.mib.2020.09.003.
- 1070 Rehmann, H., A. Wittinghofer, and J. L. Bos. 2007. "Capturing cyclic nucleotides in action:  
1071 snapshots from crystallographic studies." *Nat Rev Mol Cell Biol* 8 (1):63-73. doi:  
1072 10.1038/nrm2082.
- 1073 Rico-Jimenez, M., G. Ceballos-Perez, C. Gomez-Linan, and A. M. Estevez. 2021. "An RNA-  
1074 binding protein complex regulates the purine-dependent expression of a nucleobase  
1075 transporter in trypanosomes." *Nucleic Acids Res* 49 (7):3814-3825. doi:  
1076 10.1093/nar/gkab181.
- 1077 Rinaldi, J., J. Wu, J. Yang, C. Y. Ralston, B. Sankaran, S. Moreno, and S. S. Taylor. 2010.  
1078 "Structure of yeast regulatory subunit: a glimpse into the evolution of PKA signaling."  
1079 *Structure* 18 (11):1471-82. doi: 10.1016/j.str.2010.08.013.
- 1080 Salmon, D., S. Bachmaier, C. Krumbholz, M. Kador, J. A. Gossmann, P. Uzureau, E. Pays, and  
1081 M. Boshart. 2012. "Cytokinesis of *Trypanosoma brucei* bloodstream forms depends on  
1082 expression of adenylyl cyclases of the ESAG4 or ESAG4-like subfamily." *Mol*  
1083 *Microbiol* 84 (2):225-42. doi: 10.1111/j.1365-2958.2012.08013.x.
- 1084 Salmon, D., G. Vanwalleghem, Y. Morias, J. Denoeud, C. Krumbholz, F. Lhomme, S.  
1085 Bachmaier, M. Kador, J. Gossmann, F. B. Dias, G. De Muylder, P. Uzureau, S. Magez,  
1086 M. Moser, P. De Baetselier, J. Van Den Abbeele, A. Beschin, M. Boshart, and E. Pays.

- 1087 2012. "Adenylate cyclases of *Trypanosoma brucei* inhibit the innate immune response  
1088 of the host." *Science* 337 (6093):463-6. doi: 10.1126/science.1222753.
- 1089 Schenk, R., S. Bachmaier, F. Bringaud, and M. Boshart. 2021. "Efficient flavinylation of  
1090 glycosomal fumarate reductase by its own ApbE domain in *Trypanosoma brucei*."  
1091 *FEBS J.* doi: 10.1111/febs.15812.
- 1092 Schwede, F., E. Maronde, H. Genieser, and B. Jastorff. 2000. "Cyclic nucleotide analogs as  
1093 biochemical tools and prospective drugs." *Pharmacol Ther* 87 (2-3):199-226. doi:  
1094 10.1016/s0163-7258(00)00051-6.
- 1095 Shabb, J. B., B. D. Buzzeo, L. Ng, and J. D. Corbin. 1991. "Mutating protein kinase cAMP-  
1096 binding sites into cGMP-binding sites. Mechanism of cGMP selectivity." *J Biol Chem*  
1097 266 (36):24320-6.
- 1098 Shabb, J. B., L. Ng, and J. D. Corbin. 1990. "One amino acid change produces a high affinity  
1099 cGMP-binding site in cAMP-dependent protein kinase." *J Biol Chem* 265 (27):16031-  
1100 4.
- 1101 Su, Y., W. R. Dostmann, F. W. Herberg, K. Durick, N. H. Xuong, L. Ten Eyck, S. S. Taylor,  
1102 and K. I. Varughese. 1995. "Regulatory subunit of protein kinase A: structure of  
1103 deletion mutant with cAMP binding domains." *Science* 269 (5225):807-13. doi:  
1104 10.1126/science.7638597.
- 1105 Taylor, S. S., R. Ilouz, P. Zhang, and A. P. Kornev. 2012. "Assembly of allosteric  
1106 macromolecular switches: lessons from PKA." *Nat Rev Mol Cell Biol* 13 (10):646-58.  
1107 doi: 10.1038/nrm3432.
- 1108 Taylor, S. S., J. Wu, J. G. H. Bruystens, J. C. Del Rio, T. W. Lu, A. P. Kornev, and L. F. Ten  
1109 Eyck. 2021. "From structure to the dynamic regulation of a molecular switch: A journey  
1110 over 3 decades." *J Biol Chem* 296:100746. doi: 10.1016/j.jbc.2021.100746.
- 1111 Toh, J. Y., A. Nkouawa, S. R. Sanchez, H. Shi, N. G. Kolev, and C. Tschudi. 2021.  
1112 "Identification of positive and negative regulators in the stepwise developmental  
1113 progression towards infectivity in *Trypanosoma brucei*." *Sci Rep* 11 (1):5755. doi:  
1114 10.1038/s41598-021-85225-2.
- 1115 Traube, F. R., S. Schiffers, K. Iwan, S. Kellner, F. Spada, M. Muller, and T. Carell. 2019.  
1116 "Isotope-dilution mass spectrometry for exact quantification of noncanonical DNA  
1117 nucleosides." *Nat Protoc* 14 (1):283-312. doi: 10.1038/s41596-018-0094-6.
- 1118 Uboldi, A. D., M. L. Wilde, E. A. McRae, R. J. Stewart, L. F. Dagley, L. Yang, N. J. Katris, S.  
1119 V. Hapuarachchi, M. J. Coffey, A. M. Lehane, C. Y. Botte, R. F. Waller, A. I. Webb,  
1120 M. J. McConville, and C. J. Tonkin. 2018. "Protein kinase A negatively regulates Ca<sup>2+</sup>  
1121 signalling in *Toxoplasma gondii*." *PLoS Biol* 16 (9):e2005642. doi:  
1122 10.1371/journal.pbio.2005642.
- 1123 Vaidyanathan, P. P., B. Zinshteyn, M. K. Thompson, and W. V. Gilbert. 2014. "Protein kinase  
1124 A regulates gene-specific translational adaptation in differentiating yeast." *RNA* 20  
1125 (6):912-22. doi: 10.1261/rna.044552.114.
- 1126 Walsh, D. A., J. P. Perkins, and E. G. Krebs. 1968. "An adenosine 3',5'-monophosphate-  
1127 dependant protein kinase from rabbit skeletal muscle." *J Biol Chem* 243 (13):3763-5.
- 1128 Walter, R. D. 1978. "Multiple protein kinases from *Trypanosoma gambiense*." *Hoppe Seylers*  
1129 *Z Physiol Chem* 359 (5):601-6. doi: 10.1515/bchm.1978.359.1.601.
- 1130 Weber, I. T., J. B. Shabb, and J. D. Corbin. 1989. "Predicted structures of the cGMP binding  
1131 domains of the cGMP-dependent protein kinase: a key alanine/threonine difference in  
1132 evolutionary divergence of cAMP and cGMP binding sites." *Biochemistry* 28  
1133 (14):6122-7. doi: 10.1021/bi00440a059.
- 1134 Wu, J., S. Brown, N. H. Xuong, and S. S. Taylor. 2004. "RIalpha subunit of PKA: a cAMP-  
1135 free structure reveals a hydrophobic capping mechanism for docking cAMP into site  
1136 B." *Structure* 12 (6):1057-65. doi: 10.1016/j.str.2004.03.022.



1137 Zaccolo, M., A. Zerio, and M. J. Lobo. 2021. "Subcellular Organization of the cAMP Signaling  
1138 Pathway." *Pharmacol Rev* 73 (1):278-309. doi: 10.1124/pharmrev.120.000086.  
1139 Zagotta, W. N., N. B. Olivier, K. D. Black, E. C. Young, R. Olson, and E. Gouaux. 2003.  
1140 "Structural basis for modulation and agonist specificity of HCN pacemaker channels."  
1141 *Nature* 425 (6954):200-5. doi: 10.1038/nature01922.

1142

1143

1144

#### 1145 **Data availability**

1146

1147 The coordinates of the crystal structures of *T. cruzi* PKAR bound to inosine, *T. brucei* PKAR  
1148 bound to inosine and *T. brucei* PKAR (mutant 6) bound to cAMP and inosine have been  
1149 deposited in the Protein Data Bank under the accession codes 6HYI, 6FLO, 6H4G,  
1150 respectively. Genome sequence and annotation information was obtained from TritrypDB  
1151 (<http://www.tritrypdb.org>). Results from a search of the MODOMICS database (Boccaletto et  
1152 al. 2022) to identify nucleoside analogues identified in living organisms is provided as  
1153 supplementary file 1. The source data underlying figures, tables, and Supplementary Figures  
1154 are provided as Source Data file.

1155

1156

#### 1157 **Description of Additional Supplementary Files**

1158 File Name: Supplementary Data 1

1159 Description: Results of searching the mass spectrometry data set (Fig. 6, S7) for nucleosides  
1160 matches in the MODOMICS (<https://iimcb.genesilico.pl/modomics/>) RNA modifications  
1161 database. Red cross: peak/mass not detected. Red: peak Rf/mass: detected but not significant  
1162 over background. Green mass: peak Rf/mass: detected but not confirmed.

1163

1164 File Name: Supplementary File 2

1165 Description: List of primers used in this study

1166

1167 File Name: Supplementary Movie 1

1168 Description: Alignment between TcPKAR (PDB: 6HYI, light blue) and TbPKAR (PDB:6FLO,  
1169 chain B, light gray) displaying an RMSD of 0.909 Å calculated by PyMOL. Inosine is displayed  
1170 in green and magenta in TbPKAR and TcPKAR, respectively.

1171

1172 File Name: Supplementary Movie 2

1173 Description: Alignment between A-site of PKAR1a (PDB: 1RGS, gray, aa: 152-225) and A-site  
1174 from mutant 6 (PDB: 6H4G, light green, aa: 259-332). In mammalian PKAR, cAMP binds in  
1175 the *syn*-conformation, while in Mutant 6 it binds in the *anti*-conformation. Of particular note is  
1176 Cys278 in TbPKAR mutant 6, which is significantly displaced to the newly inserted R318.  
1177 Hydrogen bonds < 3Å are shown as black dashes.

1178

1179 File Name: Supplementary Movie 3

1180 Description: Sphere representation of the B-site from TbPKAR (PDB:6FLO, chain B, aa: 378  
1181 to 490) showing residues Y484, Y485 and K488 in the αD helix in purple, V443 in green,  
1182 inosine in blue and the rest of the protein in yellow. V443 is sandwiched between the alpha-D  
1183 helix and the beta barrel, taking part in hydrophobic contacts to both sides.

1184

1185 File Name: Supplementary Movie 4

1186 Description: Surface representation of the B-site from TbPKAR (PDB:6FLO, chain B, aa: 378  
1187 to 490) showing an inosine molecule (blue spheres) locked inside the protein with no access  
1188 to solvent. The αD helix (N481 to end) is depicted in dark purple.

1207  
1208

**Supplementary Table 1: Data collection and refinement statistics for the crystal structures**

|                                    | <i>T.brucei</i> PKAR<br>(inosine) | <i>T.brucei</i> PKAR:<br>E311A,T318R,V319A<br>(cAMP – siteA<br>inosine - siteB) | <i>T.cruzi</i> PKAR<br>(inosine) |
|------------------------------------|-----------------------------------|---------------------------------------------------------------------------------|----------------------------------|
| PDB                                | 6FLO                              | 6H4G                                                                            | 6HYI                             |
| Cell dimensions                    |                                   |                                                                                 |                                  |
| a, b, c (Å)                        | 67.46, 71.55, 122.82              | 64.67, 71.20, 121.40                                                            | 40.74, 88.53, 46.02              |
| $\alpha, \beta, \gamma$ (°)        | 90, 90, 90                        | 90, 90, 90                                                                      | 90, 98.28, 90                    |
| Data collection                    |                                   |                                                                                 |                                  |
| Resolution Range (Å)               | 49.08 - 2.14<br>(2.22 - 2.14)     | 30.21 - 2.14<br>(2.22 - 2.14)                                                   | 44.26 - 1.40<br>(1.45 - 1.40)    |
| Space group                        | P 21 21 21                        | P 21 21 21                                                                      | P 1 21 1                         |
| X-ray wavelength (Å)               | 2.075                             | 1.34                                                                            | 0.9792                           |
| Unique reflections                 | 30009 (1997)                      | 31336 (3027)                                                                    | 63354 (6238)                     |
| Reflections used for R-free        | 1998 (119)                        | 2000 (194)                                                                      | 3536 (340)                       |
| Multiplicity                       | 50                                | 3.7                                                                             | 6.5                              |
| Completeness (%)                   | 97.4                              | 98.9                                                                            | 99.3                             |
| Mean I/ $\sigma$ (I)               | 25.7 (1.0)                        | 10.4 (1.2)                                                                      | 11.7 (1.0)                       |
| Copies per ASU                     | 2                                 | 2                                                                               | 1                                |
| R <sub>merge</sub>                 | 0.15 (2.03)                       | 0.20 (1.78)                                                                     | 0.069 (1.70)                     |
| CC1/2                              | 99.5 (49.1)                       | 99.5 (47.2)                                                                     | 99.7 (48.2)                      |
| Refinement statistics              |                                   |                                                                                 |                                  |
| R <sub>work</sub> (%)              | 0.2354 (0.5243)                   | 0.2304 (0.3318)                                                                 | 0.1803 (0.3538)                  |
| R <sub>free</sub> (%)              | 0.2676 (0.4982)                   | 0.2987 (0.3907)                                                                 | 0.2011 (0.3614)                  |
| Average B factor (Å <sup>2</sup> ) |                                   |                                                                                 |                                  |
| Protein atoms                      | 34.04                             | 21.66                                                                           | 24.26                            |
| Solvent atoms                      | 37.72                             | 25.34                                                                           | 38.09                            |
| Ligand atoms                       | 33.36                             | 18.06                                                                           | 18.57                            |
| Ramachandran plot (%)              |                                   |                                                                                 |                                  |
| Favored/Allowed                    | 98/2                              | 99/1                                                                            | 98/2                             |
| Outliers                           | 0                                 | 0                                                                               | 0                                |

1209  
1210  
1211

\*Values in parentheses are for highest-resolution shell.

**Supplementary Table 2: Binding parameters from ITC measurements**

1212

| PKAR subunit                                                                   | Ligand               | K <sub>D</sub> [nM] <sup>1</sup> | Molar ratio |
|--------------------------------------------------------------------------------|----------------------|----------------------------------|-------------|
| human PKAR1α                                                                   | cAMP                 | 23 ± 15                          | 1.6 ± 0.3   |
|                                                                                | Inosine <sup>3</sup> | >10 <sup>7</sup>                 |             |
| TbPKAR(199-499)                                                                | Inosine              | 18 ± 7                           | 0.9 ± 0.2   |
|                                                                                | Guanosine            | 150 ± 51                         | 1.0 ± 0.1   |
|                                                                                | Adenosine            | 825 ± 321                        | 0.8 ± 0.1   |
|                                                                                | cAMP <sup>2,3</sup>  | >10 <sup>7</sup>                 |             |
| LdPKAR1(200-502)                                                               | Inosine              | 59 ± 17                          | 1.6 ± 0.4   |
|                                                                                | Guanosine            | 173 ± 58                         | 1.5 ± 0.3   |
|                                                                                | Adenosine            | 1157 ± 226                       | 2.0 ± 0.1   |
|                                                                                | cAMP <sup>3</sup>    | >10 <sup>7</sup>                 |             |
| TbPKAR(199-499)<br>E311A, T318R,<br>V319A<br>(mutant 6)                        | Inosine              | 18 ± 10                          | 0.5 ± 0.1   |
|                                                                                | Guanosine            | 6 ± 3                            | 0.7 ± 0.1   |
|                                                                                | Adenosine            | 1100 ± 200                       | 0.6 ± 0.1   |
| TbPKAR(199-499)<br>E435A, N442R,<br>V443A<br>(mutant 7)                        | Inosine              | 9 ± 4                            | 0.6 ± 0.1   |
|                                                                                | Guanosine            | 221 ± 27                         | 0.7 ± 0.1   |
|                                                                                | Adenosine            | 82 ± 11                          | 0.6 ± 0.1   |
| TbPKAR(199-499)<br>E311A, T318R,<br>V319A<br><b>Y484A, Y485A</b><br>(mutant 8) | Inosine              | 1476 ± 125                       | 0.6 ± 0.1   |

1213  
1214  
1215  
1216  
1217

<sup>1</sup> mean ± SD of ≥ three independent measurements

<sup>2</sup> taken from Bachmaier et al. 2019

<sup>3</sup> technical limit of MicroCal PeaQ ITC - interpreted as no binding



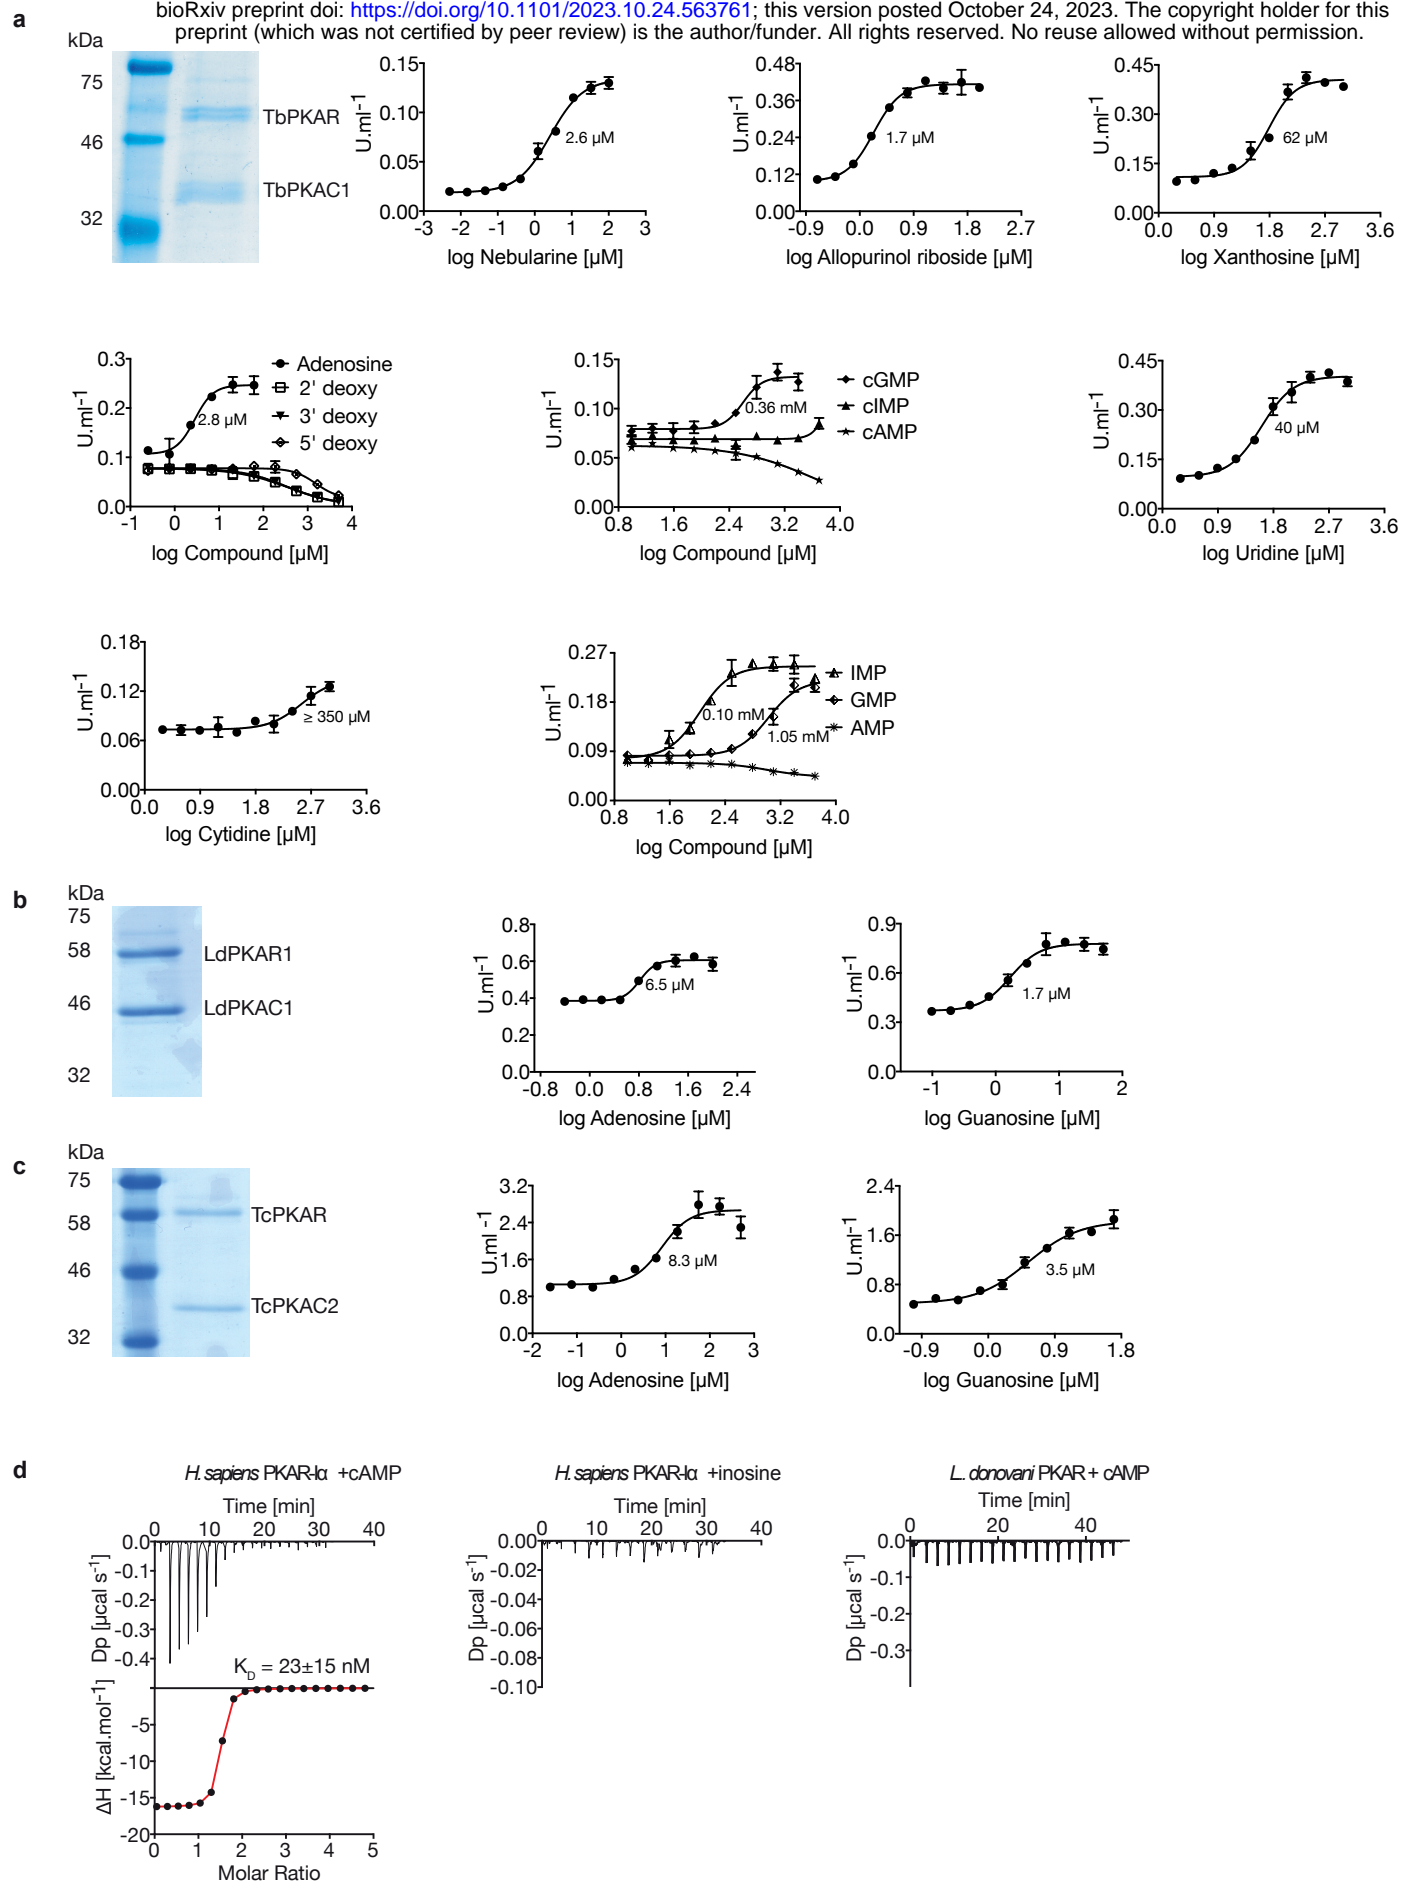

### Supplementary Figure 1. Kinetoplastid PKA activation.

**a** Representative dose-response curves for activation of *T. brucei* PKAR-PKAC1 holoenzyme by compounds (structural formula of some in Fig. 1a). The calculated  $EC_{50}$  values (taken from Table 1) are displayed next to the curve, error bars indicate SD of technical triplicates. Purity of recombinant TbPKA (6xHis-TbPKAR/strep-TbPKAC1) was confirmed by SDS-PAGE (left). **b, c** as in A for LdPKA (6xHis-LdPKAR1/strep-LdPKAC1) and TcPKA (6xHis-TcPKAR/strep-TcPKAC2). Purity of recombinant proteins was confirmed by SDS-PAGE (left). **d** Binding isotherms of refolded APO *H. sapiens* PKAR1 $\alpha$ (1-381) in response to cAMP (left) and inosine (centre). On the right, binding isotherm for *L. donovani* PKAR1(200-502) in response to cAMP. Data representation as in Fig. 1d, the calculated  $K_D$  value for *H. sapiens* PKAR1 $\alpha$ (1-381) binding of cAMP (mean  $\pm$  SD) is taken from Supplementary Table 2.

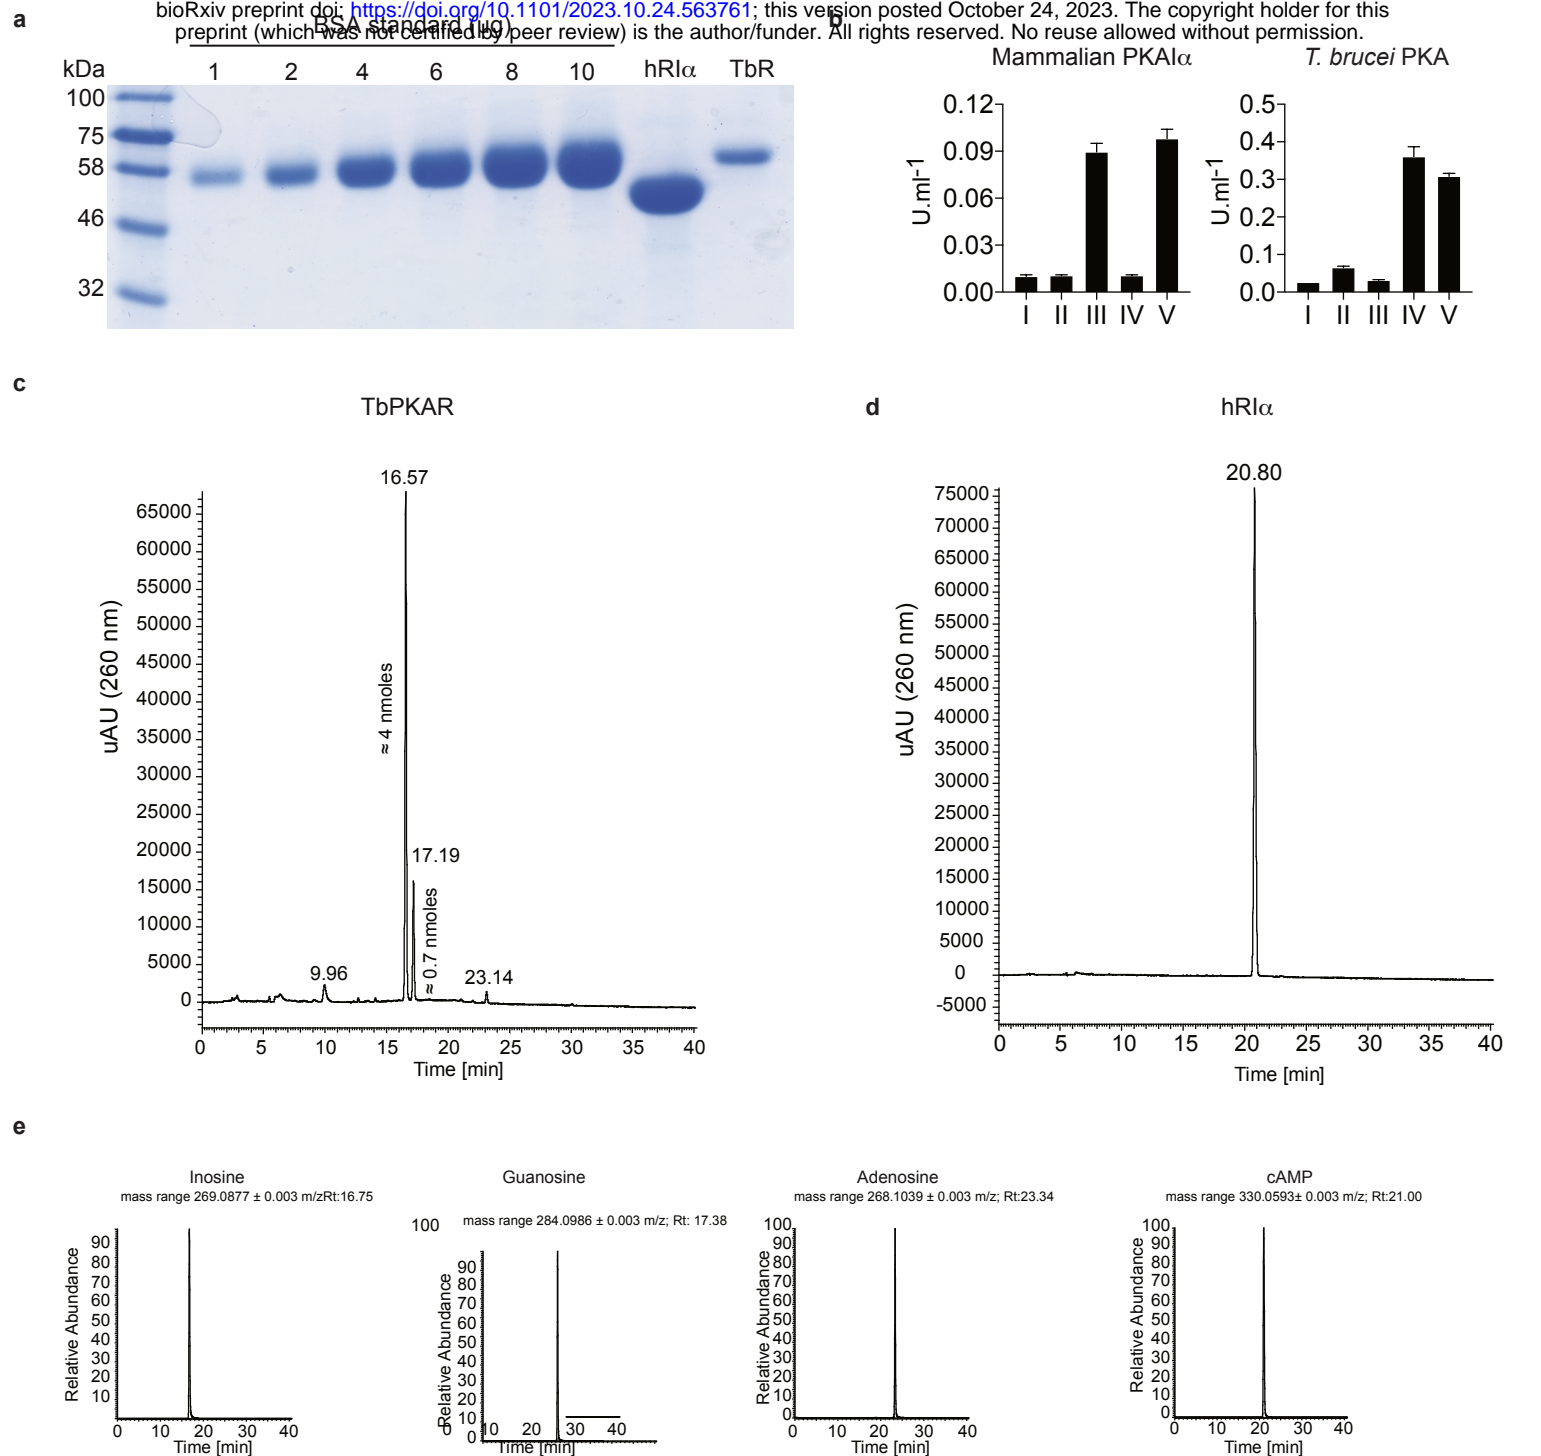

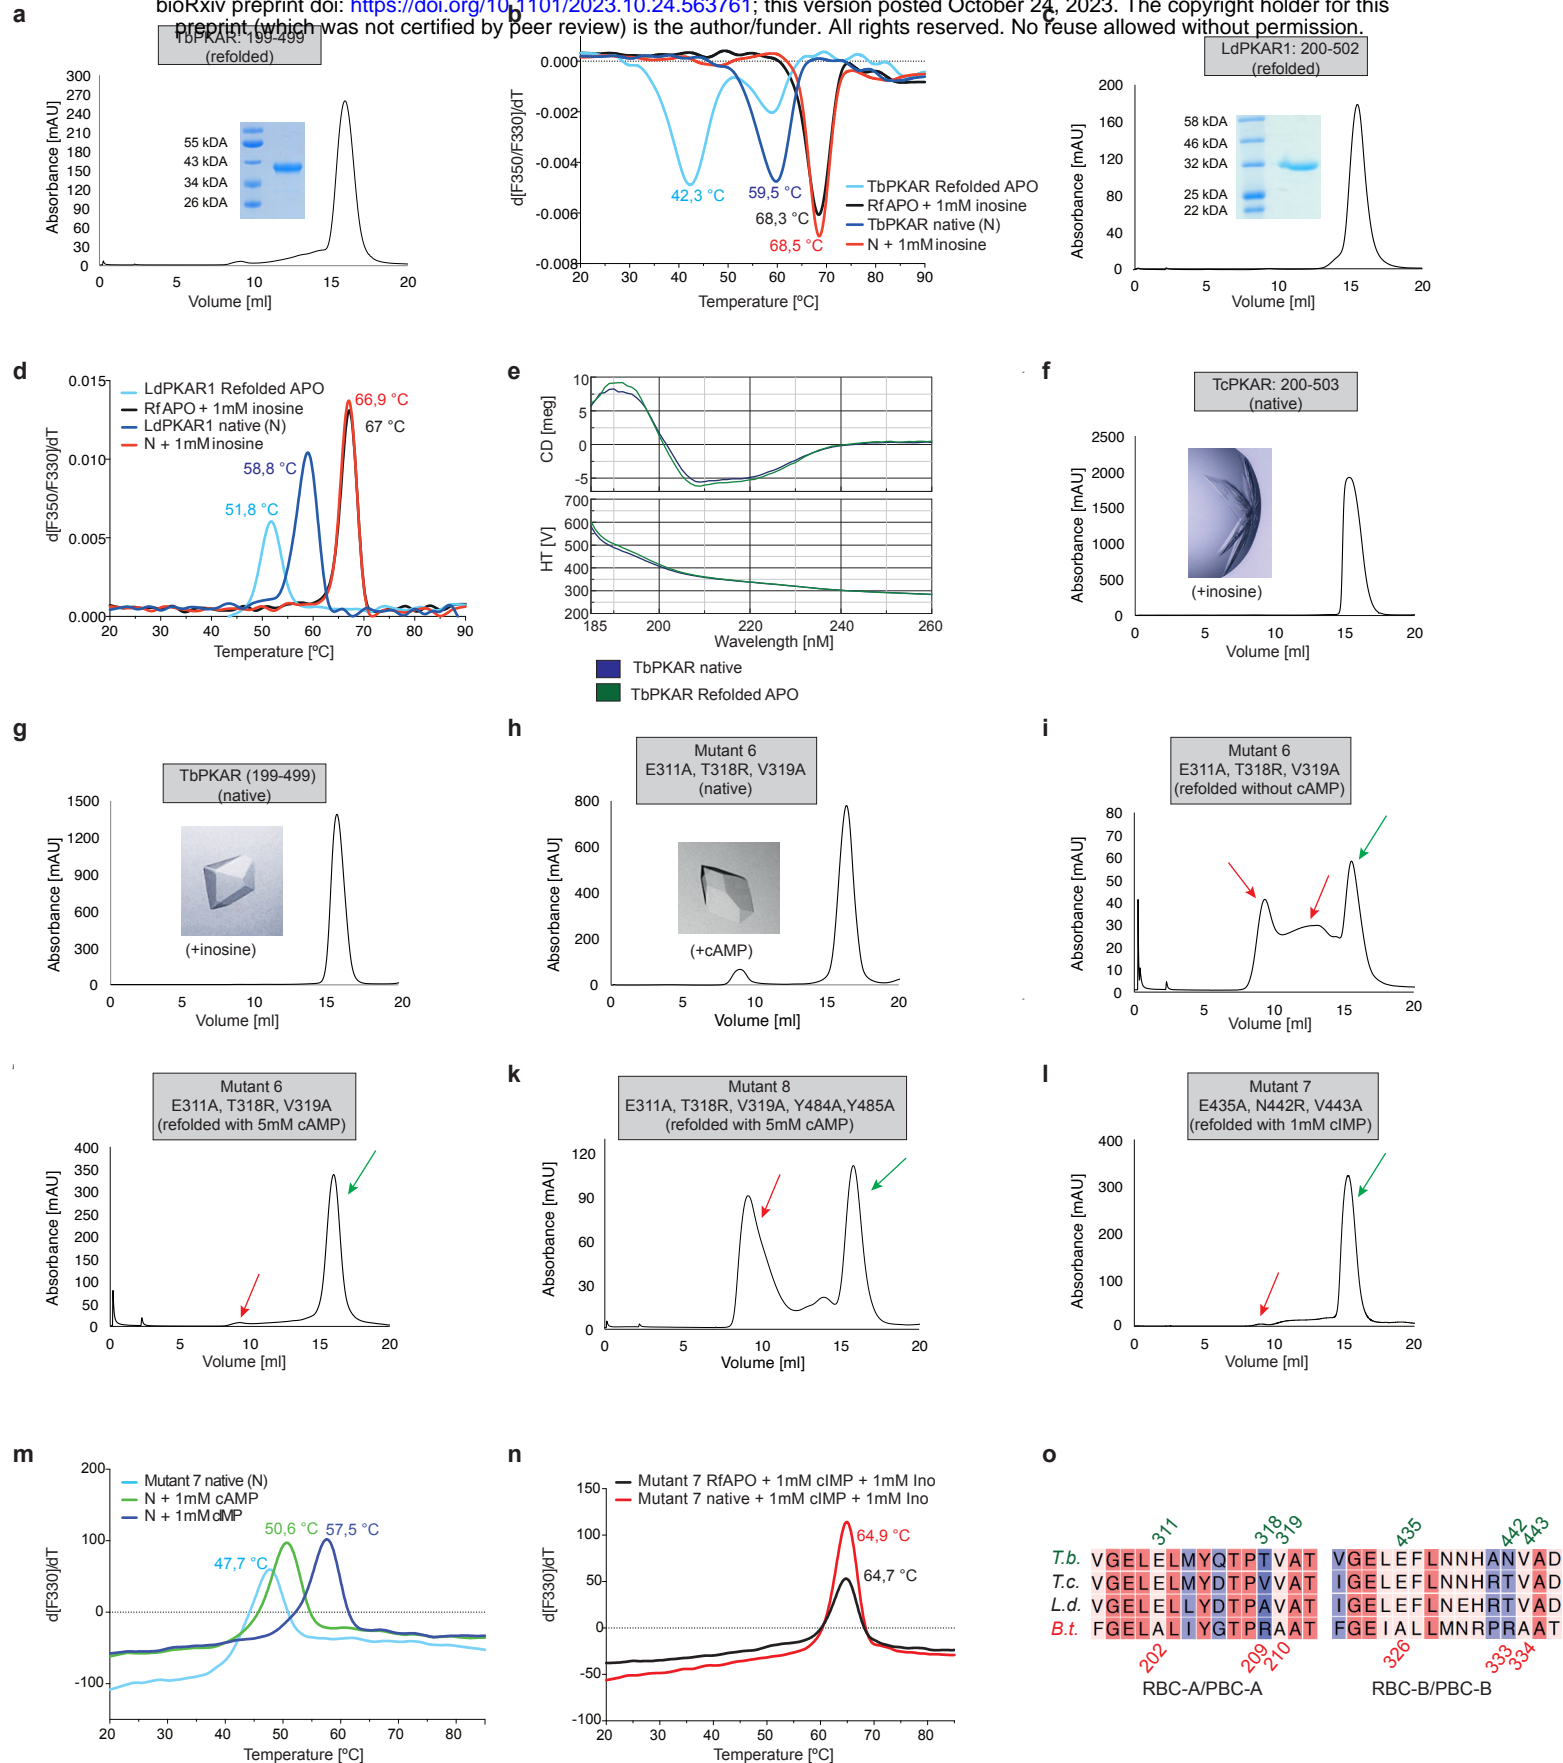

### Supplementary Figure 3. Protein purification and quality controls for ITC and crystallization experiments

**a, c** Size Exclusion Chromatogram (SEC) of refolded APO TbPKAR(199-499) and LdPKAR1(200-502), respectively, used for ITC. Purity and expected molecular mass of protein samples are confirmed by SDS-PAGE (inset). **b** Thermal denaturation profiles (nanoDSF) of refolded APO (RfAPO) and native (N) *T. brucei* PKAR(199-499) with and without ligands. **d** Same as b for LdPKAR1(200-502) in absence or upon addition of 1mM inosine. **e** Circular dichroism spectra (average of 20 scans) of TbPKAR mutant 6 native (dark blue) and refolded APO (green) preparations. **f-h** Size exclusion chromatograms of purified TcPKAR(200-503), TbPKAR(199-499) and TbPKAR mutant 6, as indicated. Ligands added for co-crystallization are given next to the image of a representative crystal. **i-j** Same as A for TbPKAR mutant 6 refolded without cAMP (i) and with 5 mM cAMP (j). Green arrows indicate protein monomers, red arrows indicate aggregated or misfolded protein. **k** Same as A for TbPKAR mutant 8. **l** Same as A for TbPKAR mutant 7 refolded in presence of 1mM cIMP. **m** Thermal denaturation profiles (nanoDSF) of native (N) TbPKAR mutant 7 in absence (light blue) and upon incubation with 1mM cAMP (green) or 1mM cIMP (dark blue). **n** Same as M for native TbPKAR mutant 7 (red) and refolded APO TbPKAR mutant 7(RfAPO, black) in presence of 1mM cIMP and 1mM inosine. **o** Sequence alignment of RBC-A/PBC-A(left) and RBC-B/PBC-B (right) motifs within CNB-A (left) and CNB-B (right) of PKAR from *T. brucei* (*T.b.*), *T. cruzi* (*T.c.*), *L. donovani* (*L.d.*) and *B. taurus* (*B.t.*). Numbering refers to sequence of *T. brucei* (top, green) and *B. taurus* (bottom, red). Degree of sequence conservation is indicated in a colour code from red (high conservation) to blue (low conservation).

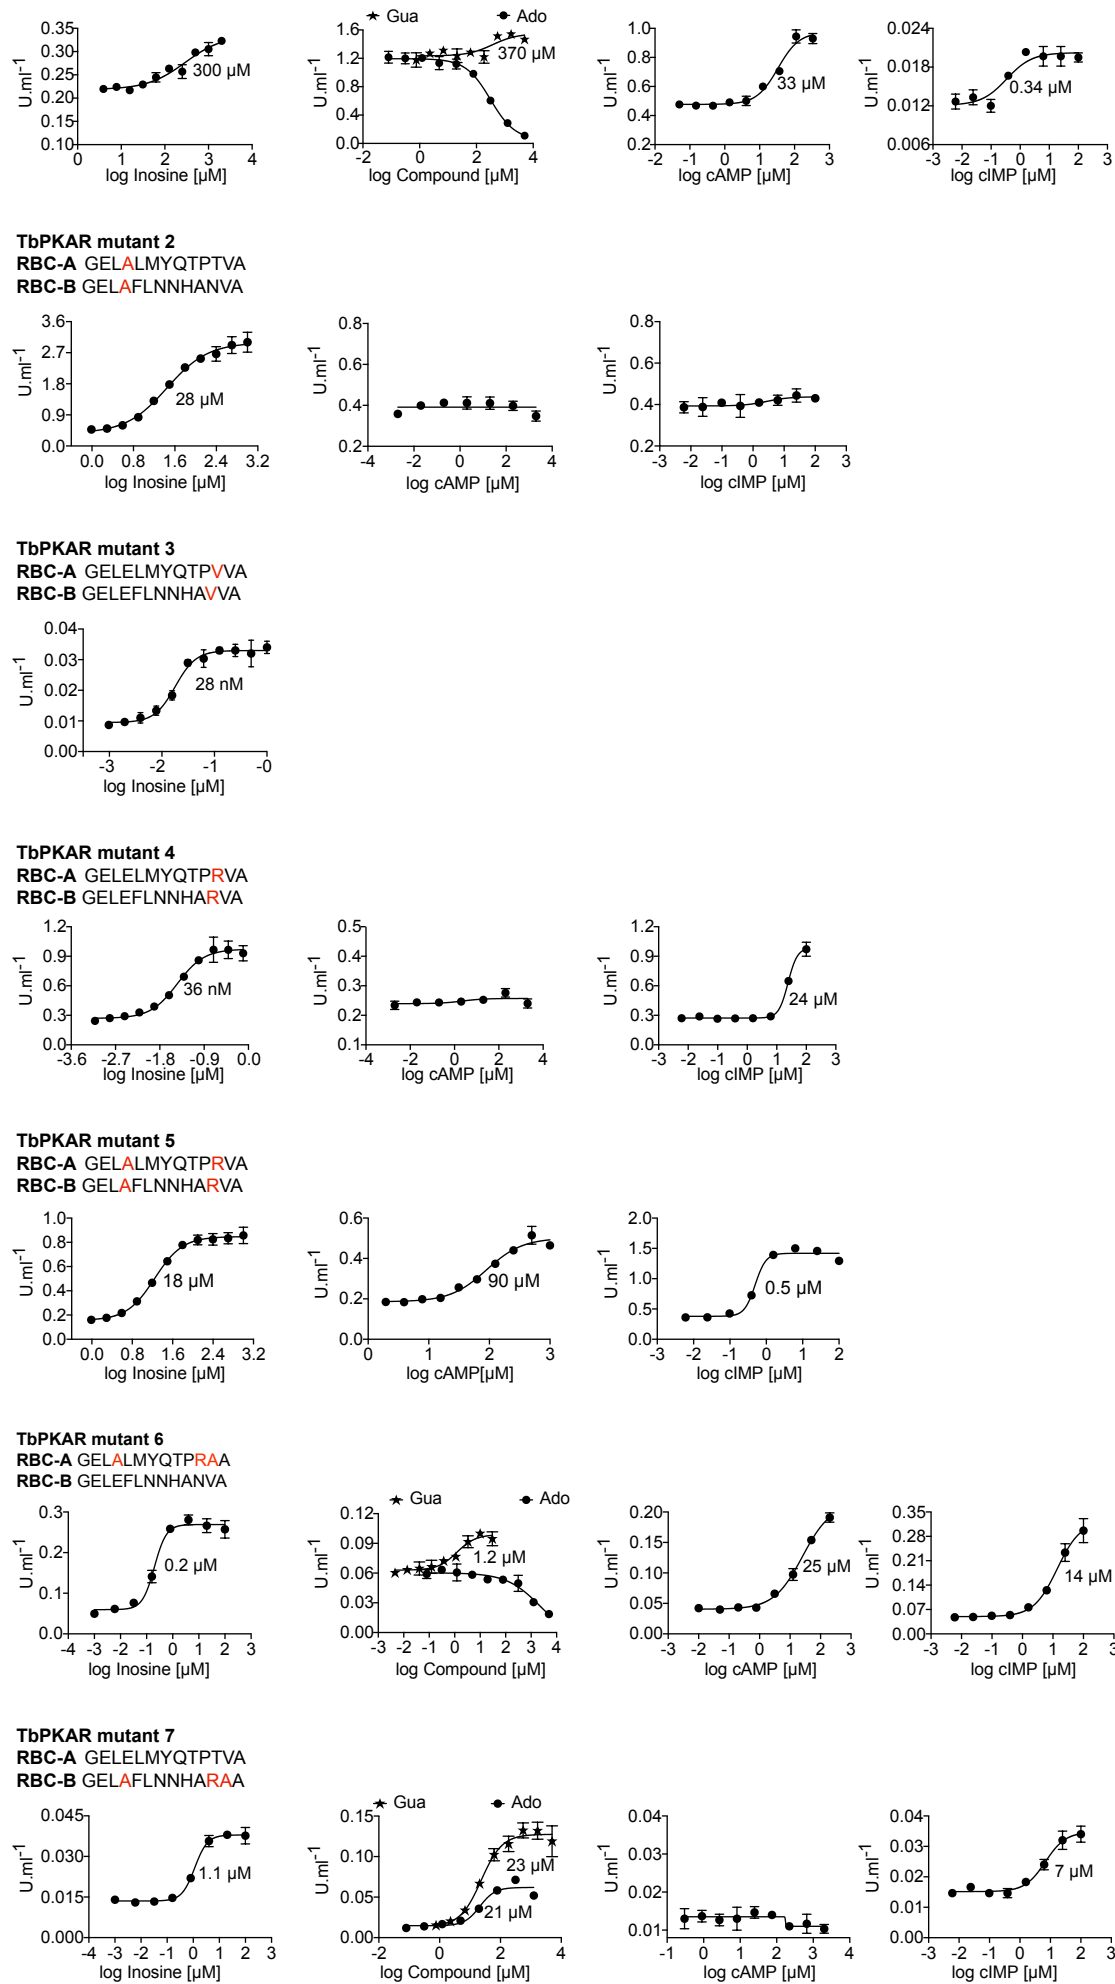

**Supplementary Figure 4. Activation of mutant TbPKA holoenzymes by different ligands.**

Representative dose-response curves for activation of *T. brucei* PKA holoenzyme mutants 1-7 by purine nucleosides and cyclic nucleotides as in Fig. 1a. The sequences of RBC-A and RBC-B of mutants 1-7 are placed above the graphs with mutated amino acids highlighted in red. Calculated EC<sub>50</sub> values are taken from Table 2.

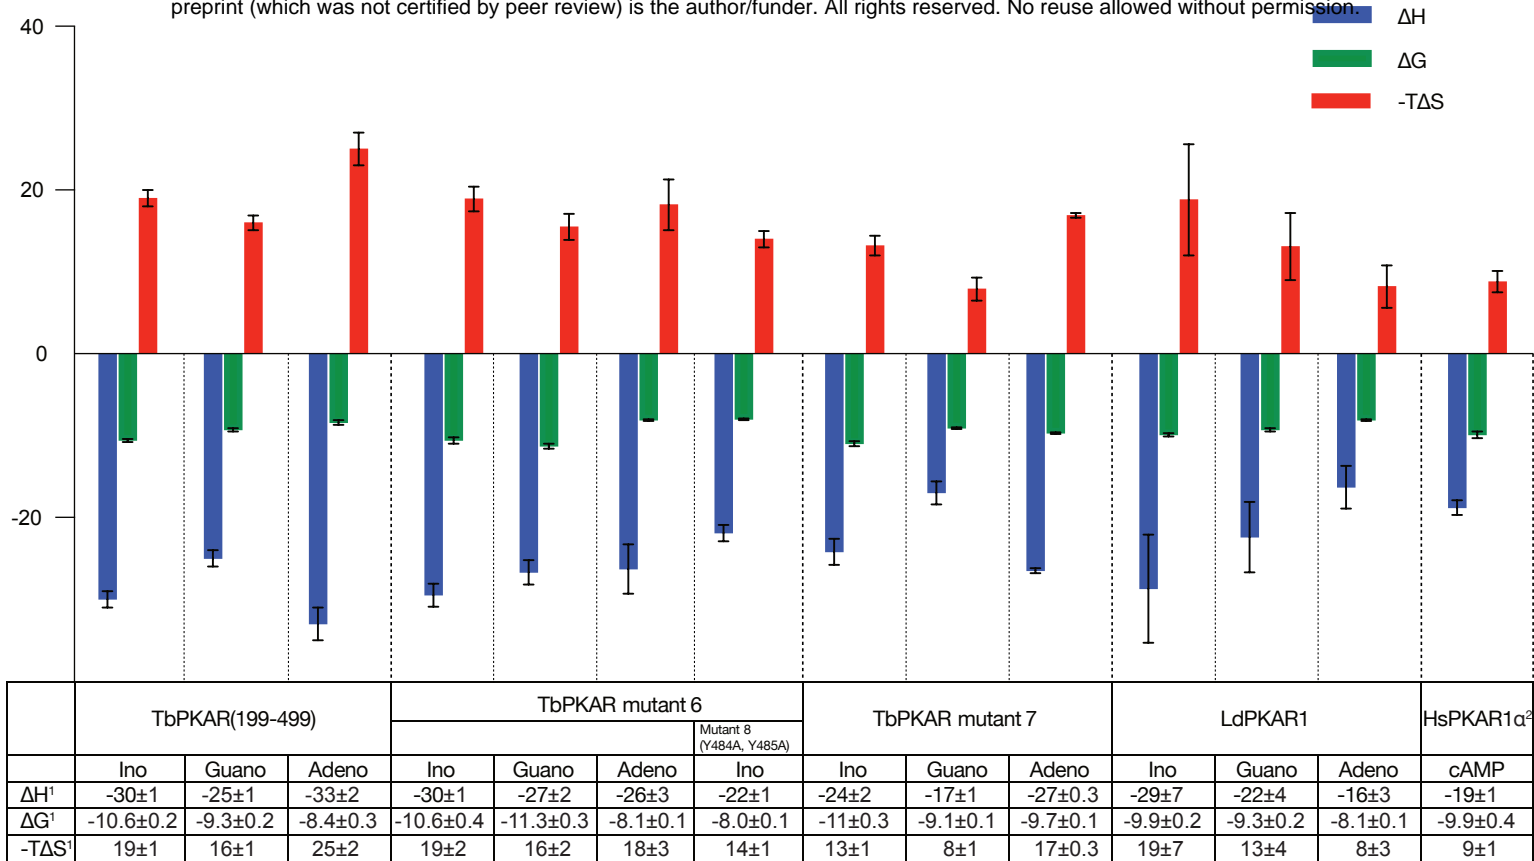

<sup>1</sup> mean ± SD of ≥ 3 independent measurements

<sup>2</sup> taken from Bachmaier et al. 2019

**Supplementary Figure 5. Thermodynamic signatures of ligand binding from ITC experiments.**

Direct comparison of the thermodynamic signatures from all ITC experiments summarized in Supplementary Table 2. Binding enthalpy is shown in green (ΔH), Gibbs free energy in blue (ΔG) and entropy in red (-TΔS).

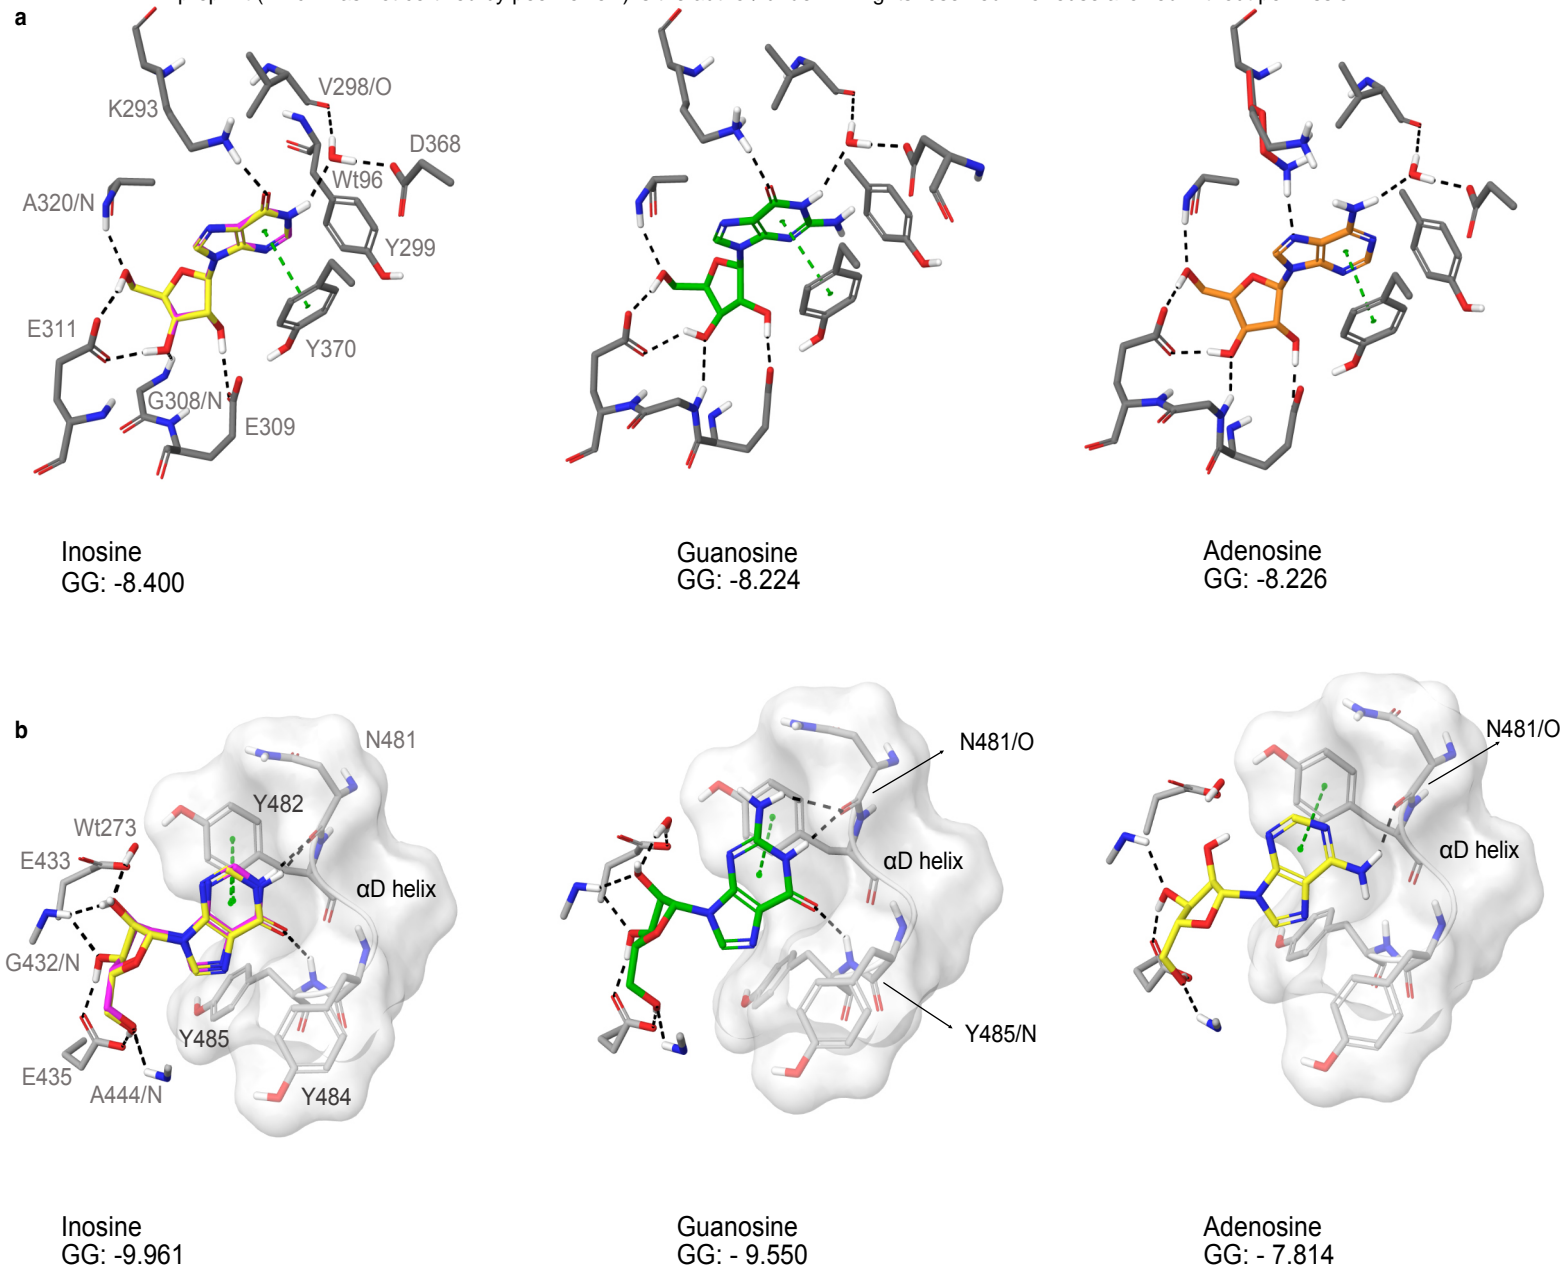

**Supplementary Figure 6. Docking of nucleosides to A and B site of TbPKAR.**

**a** Purine nucleosides (guanosine and adenosine) were docked into site A in the *T. brucei* PKAR crystal structure (PDB: 6FLO, chain B,) using GLIDE (Friesner et al., 2004), as implemented in Maestro (Schrödinger™). Best poses were chosen according to the Glide G score (GG), given in the figure. **b** Same as A for site B.

As a control, re-docking of inosine (magenta) was performed for comparison with the ligand in the crystal structures (yellow). RMSD values are 0.035 Å for site A and 0.036 Å for site B.



PCF wild type

Inosine

Guanosine

Adenosine

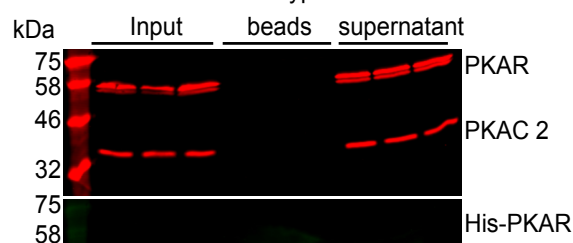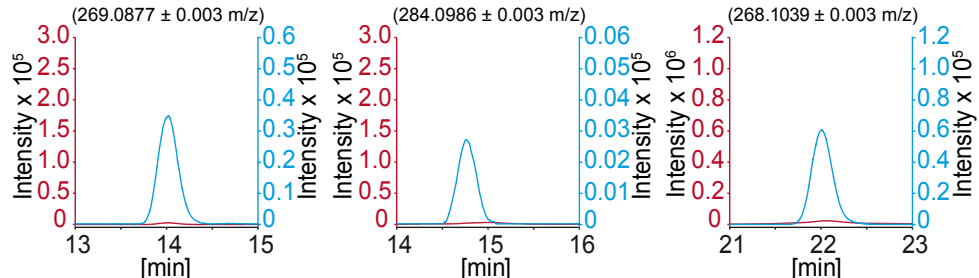

PCF HisPKAR

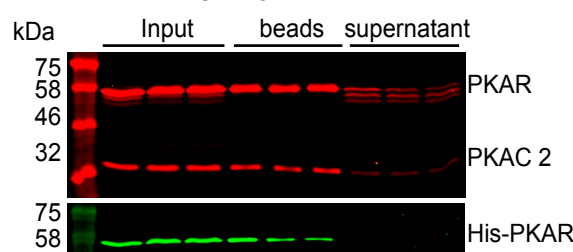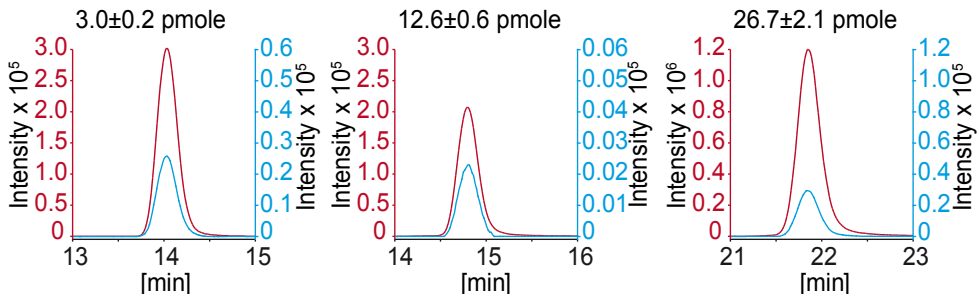

— Nucleoside — <sup>13</sup>C<sub>5</sub>-Nucleoside

**b**

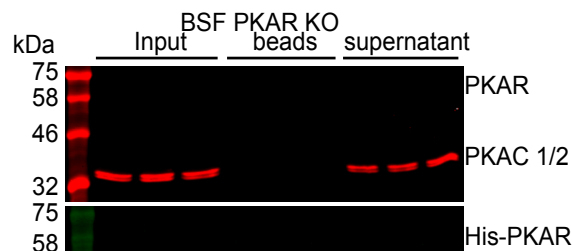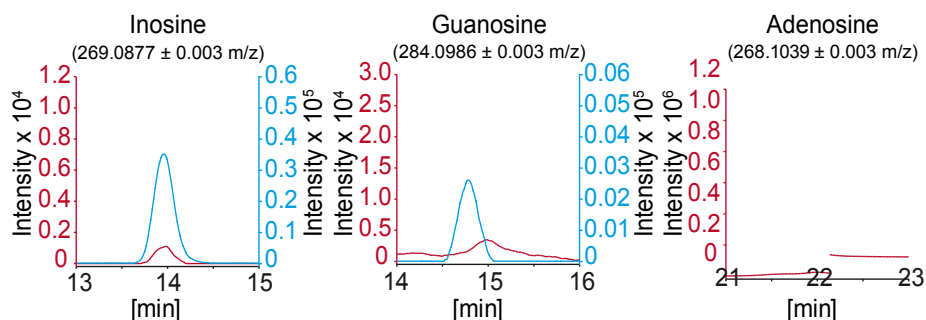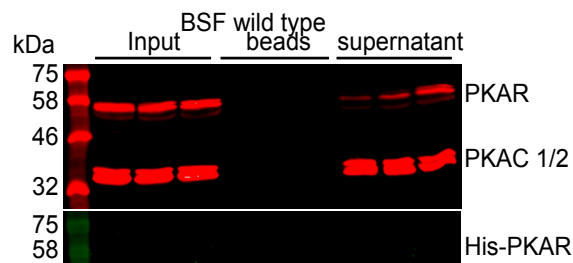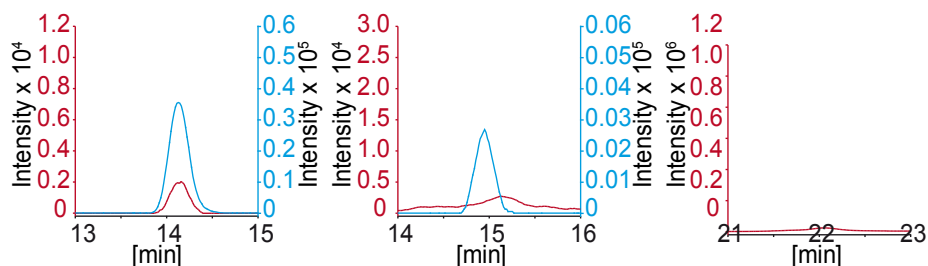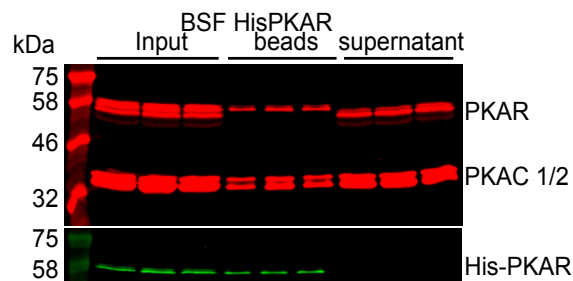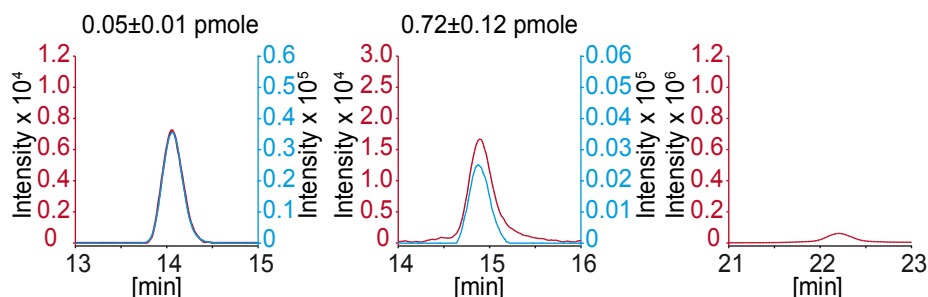

— Nucleoside — <sup>13</sup>C<sub>5</sub>-Nucleoside

**Supplementary Figure 7. HPLC-MS quantification of ligands bound to TbPKAR in parasite lysates.**

The left panels show western analysis of soluble fraction from lysed parasites expressing tagged TbPKAR or of control parasites (input), pulled down beads and supernatants (all in triplicate). Anti-PKAR, anti-PKAC1/2 and anti-His antibodies were used. Bound ligands were released by boiling of Ni-NTA beads in water and the aqueous fraction subjected to HPLC-MS analysis. Graphs on the right show chromatograms for the selected mass  $[M+H]^+$  0.003 m/z (given in parenthesis) for inosine, guanosine and adenosine (all red coloured), and the matched stable isotope labelled internal standards (all blue coloured). Where peak quantification was in the linear range of the standard curves,  $m \pm SD$  pmole of nucleoside per biological replicate of  $8 \times 10^8$  or  $2 \times 10^8$  cells is given for PCF or BSF, respectively (same values in Fig. 6). For graphical reasons the MS-signals were smoothed by Boxcar algorithm. **a** Procyclic stage (PCF) *T. brucei* strain EATRO1125 wild type cells and cells expressing His-TbPKAR, as indicated. Nucleoside amounts pulled down from wild type PCF were in the range of blanks. **b** Same as A for bloodstream stage *T. brucei* MITat 1.2 single marker  $\Delta tbpkar/\Delta tbpkar$  cells, wild type cells and cells expressing His-TbPKAR, as indicated. Only trace amounts of adenosine were detected.
